# Supplementary material for: Genome-wide association meta-analyses and fine-mapping elucidate pathways influencing albuminuria
Source: Springer Nature journal article supplement (doi:10.1038/s41467-019-11576-0), 2019-09-11
Supplement: MOESM2 [file 41467_2019_11576_MOESM2_ESM.pdf › 41467_2019_11576_MOESM2_ESM.pdf]

**Genome-wide association meta-analyses and fine-mapping elucidate pathways  
influencing albuminuria**

Teumer *et al.*

SUPPLEMENTARY INFORMATION

## Table of Contents

**SUPPLEMENTARY NOTE 1: EXTENDED ACKNOWLEDGEMENTS**

**SUPPLEMENTARY FIGURE 1: WORKFLOW OF THE PROJECT**

**SUPPLEMENTARY FIGURE 2: REGIONAL ASSOCIATION PLOTS FOR LOCI IDENTIFIED IN TRANS-ETHNIC GWAS META-ANALYSIS OF UACR**

**SUPPLEMENTARY FIGURE 3: EXPECTED NUMBER OF DISCOVERIES AT INCREASING GWAS DISCOVERY SAMPLE SIZES.**

**SUPPLEMENTARY FIGURE 4: REGIONAL ASSOCIATION PLOTS FOR LOCI IDENTIFIED IN TRANS-ETHNIC GWAS META-ANALYSIS OF UACR AMONG INDIVIDUALS WITH DIABETES**

**SUPPLEMENTARY FIGURE 5: MANHATTAN PLOTS FOR ALL SECONDARY GWAS META-ANALYSES**

**SUPPLEMENTARY FIGURE 6: QQ PLOTS PLOTS FOR ALL GWAS META-ANALYSES**

**SUPPLEMENTARY FIGURE 7: ENRICHMENT ANALYSIS RESULTS FOR PHYSIOLOGICAL SYSTEM WHERE UACR-ASSOCIATED GENES ARE HIGHLY EXPRESSED**

**SUPPLEMENTARY FIGURE 8: CO-LOCALIZATION OF UACR-ASSOCIATION SIGNALS WITH GENE EXPRESSION IN CIS ACROSS 47 HUMAN TISSUES**

**SUPPLEMENTARY FIGURE 9: THE *DROSOPHILA OAF* AND *PRKCI* ARE BOTH REQUIRED FOR NEPHROCYTE FUNCTION AND *PRKCI*-RNAI AFFECTS SLIT DIAPHRAGM FORMATION**

**SUPPLEMENTARY TABLE 1: ASSOCIATION RESULTS OF THE UACR GENETIC RISK SCORE QUARTILES WITH MICROALBUMINURIA IN THE UKBB**

**SUPPLEMENTARY TABLE 2: ASSOCIATION RESULTS OF THE GENETIC RISK SCORE (GRS) ANALYSES OF UACR AND IT'S RISK FACTORS**

**SUPPLEMENTARY TABLE 3: EVIDENCE FOR ADDITIONAL CANDIDATE CAUSAL GENES AT UACR-ASSOCIATED VARIANTS**

**SUPPLEMENTARY TABLE 4: RESULTS OF THE TRANS-EQTL ANALYSIS**

**SUPPLEMENTARY TABLE 5: CO-LOCALIZATION RESULTS OF UACR ASSOCIATION SIGNALS WITH THOSE FROM ASSOCIATIONS WITH PLASMA PROTEIN LEVELS**

**REFERENCES**

## Supplementary Note 1: Extended acknowledgements

The Genotype-Tissue Expression (GTEx) Project<sup>1</sup> was supported by the Common Fund of the Office of the Director of the National Institutes of Health, and by NCI, NHGRI, NHLBI, NIDA, NIMH, and NINDS.

Variant annotation was supported by software resources provided via the Caché Campus program of the InterSystems GmbH to Alexander Teumer.

Data on coronary artery disease have been contributed by CARDIoGRAMplusC4D investigators and have been downloaded from [www.CARDIOGRAMPLUSC4D.ORG](http://www.CARDIOGRAMPLUSC4D.ORG).

The MEGASTROKE project received funding from sources specified at <http://www.megastroke.org/acknowledgments.html>. The complete list of all MEGASTROKE contributors is provided at the end of the Acknowledgements.

### *Study-specific acknowledgements and funding sources*

- AA-DHS** NIH R01 DK071891 (Barry I. Freedman, PI); NIH R01 NS075107 (Barry I. Freedman, PI).
- ADVANCE** ADVANCE genomic sub-studies were supported by grants from the Ministry of Science and Innovation from the Quebec Government, from Genome Quebec, from the Consortium Québécois du Médicament, from the Canadian Institutes of Health Research and from Medpharmgene, OPTITHERA Inc and Les Laboratoires Servier.
- AGES** This study has been funded by NIA contract N01-AG-12100 and HHSN271201200022C with contributions from NEI, NIDCD and NHLBI, the NIA Intramural Research Program, Hjartavernd (the Icelandic Heart Association), and the Althingi (the Icelandic Parliament). The study is approved by the Icelandic National Bioethics Committee, VSN: 00-063. The researchers thank the participants for their willingness to participate in the study.
- Amish** We thank the Amish research volunteers for their long-standing partnership in research, and the research staff at the Amish Research Clinic for their work and dedication. The Amish contribution was supported by NIH grants R01 AG18728, R01 HL088119, U01 GM074518, U01 HL072515, U01 HL084756, and NIH K12RR023250, and P30 DK072488. Additional support was provided by the University of Maryland General Clinical Research Center, grant M01 RR 16500, the Baltimore Veterans Administration Medical Center Geriatrics Research, and the Paul Beeson Physician Faculty Scholars in Aging Program.
- ARIC** The Atherosclerosis Risk in Communities study has been funded in whole or in part with Federal funds from the National Heart, Lung, and Blood Institute, National Institutes of Health, Department of Health and Human Services (contract numbers HHSN268201700001I, HHSN268201700002I, HHSN268201700003I, HHSN268201700004I and HHSN268201700005I), R01HL087641, R01HL086694; National Human Genome Research Institute contract U01HG004402; and National Institutes of Health contract HHSN268200625226C. The authors thank the staff and participants of the ARIC study for their important contributions. Infrastructure was partly supported by Grant Number UL1RR025005, a component of the National Institutes of Health and NIH Roadmap for Medical Research. The work of Anna Köttgen was supported by a Heisenberg Professorship (KO 3598/3-1) as well as CRC 1140 Projektnummer 246781735 and CRC 992 of the German Research Foundation.

- CHRIS** Full acknowledgements for the CHRIS study are reported at <http://translational-medicine.biomedcentral.com/articles/10.1186/s12967-015-0704-9#Declarations>. The CHRIS study was funded by the Department of Innovation, Research, and University of the Autonomous Province of Bolzano-South Tyrol.
- CHS** Cardiovascular Health Study: This CHS research was supported by NHLBI contracts HHSN268201200036C, HHSN268200800007C, HHSN268201800001C, HHSN268200960009C, N01HC55222, N01HC85079, N01HC85080, N01HC85081, N01HC85082, N01HC85083, N01HC85086; and NHLBI grants U01HL080295, R01HL087652, R01HL105756, R01HL103612, R01HL120393, R01HL085251, and U01HL130114 with additional contribution from the National Institute of Neurological Disorders and Stroke (NINDS). Additional support was provided through R01AG023629 from the National Institute on Aging (NIA). A full list of principal CHS investigators and institutions can be found at CHSNHLBI.org. The provision of genotyping data was supported in part by the National Center for Advancing Translational Sciences, CTSI grant UL1TR001881, and the National Institute of Diabetes and Digestive and Kidney Disease Diabetes Research Center (DRC) grant DK063491 to the Southern California Diabetes Endocrinology Research Center. The content is solely the responsibility of the authors and does not necessarily represent the official views of the National Institutes of Health.
- DECODE** The study was funded by deCODE Genetics/Amgen inc. We thank the study subjects for their valuable participation and our colleagues, who contributed to data collection, sample handling, and genotyping.
- DIACORE** Cohort recruiting and management was funded by the KfH Stiftung Präventivmedizin e.V. (Carsten A. Böger). Genome-wide genotyping was funded by the Else Kröner-Fresenius-Stiftung (2012\_A147), the KfH Stiftung Präventivmedizin and the University Hospital Regensburg. Data analysis was funded by the Else Kröner-Fresenius Stiftung (2012\_A147) and by the DFG with grant number BO 3815/4-1. The work of Iris M. Heid and Carsten A. Böger was supported by DFG CRC 1350/C6 and DFG BO 3815/4-1.
- ESTHER** The ESTHER study was funded by the Saarland state Ministry for Social Affairs, Health, Women and Family Affairs (Saarbrücken, Germany), the Baden-Württemberg state Ministry of Science, Research and Arts (Stuttgart, Germany), the Federal Ministry of Education and Research (Berlin, Germany) and the Federal Ministry of Family Affairs, Senior Citizens, Women and Youth (Berlin, Germany).
- FHS** The Framingham Heart Study is supported by HHSN268201500001.
- FINCAVAS** The Finnish Cardiovascular Study (FINCAVAS) has been financially supported by the Competitive Research Funding of the Tampere University Hospital (Grant 9M048 and 9N035), the Finnish Cultural Foundation, the Finnish Foundation for Cardiovascular Research, the Emil Aaltonen Foundation, Finland, the Tampere Tuberculosis Foundation, and EU Horizon 2020 (grant 755320 for TAXINOMISIS). The authors thank the staff of the Department of Clinical Physiology for collecting the exercise test data.
- GCKD** The GCKD study was funded by the German Ministry of Research and Education (Bundesministerium für Bildung und Forschung, BMBF) and by the Foundation KfH Stiftung Präventivmedizin. Unregistered grants to support the study were provided by Bayer, Fresenius Medical Care and Amgen. Genotyping was supported by Bayer Pharma AG. Uromodulin measurements in GCKD were supported by the Swiss National Centre of Competence in Research Kidney Control of Homeostasis program and the Swiss National Science Foundation grant 31003A\_169850. The work of Matthias Wuttke was supported by DFG CRC 1140 and the Else Kroener Fresenius Forschungskolleg NAKSYS. The work of Yong Li was supported by DFG KO 3598/4-1.



The work of Anselm Hoppmann was partly supported by NIDDK R01 DK087635-09.

#### **Generation R**

The Generation R Study is conducted by the Erasmus Medical Center in close collaboration with the School of Law and Faculty of Social Sciences of the Erasmus University Rotterdam, the Municipal Health Service Rotterdam area, Rotterdam, the Rotterdam Homecare Foundation, Rotterdam and the Stichting Trombosedienst & Artsenlaboratorium Rijnmond (STAR-MDC), Rotterdam. We acknowledge the contribution of children and parents, general practitioners, hospitals, midwives and pharmacies in Rotterdam. The generation and management of GWAS genotype data for the Generation R Study was done at the Genetic Laboratory of the Department of Internal Medicine, Erasmus MC, the Netherlands. We would like to thank Karol Estrada, Dr. Tobias A. Knoch, Anis Abuseiris, Luc V. de Zeeuw, and Rob de Graaf, for their help in creating GRIMP, BigGRID, MediGRID, and Services@MediGRID/D-Grid, [funded by the German Bundesministerium fuer Forschung und Technology; grants 01 AK 803 A-H, 01 IG 07015 G] for access to their grid computing resources. We thank Pascal Arp, Mila Jhamai, Marijn Verkerk, Manoushka Ganesh, Lizbeth Herrera and Marjolein Peters for their help in creating, managing and QC of the GWAS database. The general design of Generation R Study is made possible by financial support from the Erasmus MC, University Medical Center, Rotterdam, the Netherlands Organization for Health Research and Development (ZonMw) and the Ministry of Health, Welfare and Sport. Fernando Rivadeneira received additional funding from the Netherlands Organization for Health Research and Development (VIDI 016. 136. 367). This project received additional funding from the European Union's Horizon 2020 research and innovation programme under grant agreements No 633595 (DynaHEALTH) and No 733206 (LifeCycle).

#### **JHS**

JHS acknowledgement. The Jackson Heart Study (JHS) is supported and conducted in collaboration with Jackson State University (HHSN268201800013I), Tougaloo College (HHSN268201800014I), the Mississippi State Department of Health (HHSN268201800015I) and the University of Mississippi Medical Center (HHSN268201800010I, HHSN268201800011I and HHSN268201800012I) contracts from the National Heart, Lung, and Blood Institute (NHLBI) and the National Institute for Minority Health and Health Disparities (NIMHD). The authors also wish to thank the staffs and participants of the JHS. James G. Wilson is supported by U54GM115428 from the National Institute of General Medical Sciences. Laura M. Raffield is supported by T32 HL129982.

JHS disclaimer. The views expressed in this manuscript are those of the authors and do not necessarily represent the views of the National Heart, Lung, and Blood Institute; the National Institutes of Health; or the U.S. Department of Health and Human Services.

#### **KORA**

The KORA research platform (KORA, Cooperative Health Research in the Region of Augsburg) was initiated and financed by the Helmholtz Zentrum München - German Research Center for Environmental Health, which is funded by the German Federal Ministry of Education (BMBF) and Research and by the State of Bavaria. Furthermore, KORA research was supported within the Munich Center of Health Sciences (MC Health), Ludwig-Maximilians-Universität, as part of LMUinnovativ. Statistical KORA analyses were supported by DFG BO-3815/4-1 (to Carsten A. Böger) and BMBF 01ER1206 and 01ER1507 (to Iris M. Heid) and by University of Regensburg.

#### **LIFE-Adult, LIFE-Child**

LIFE-Adult and LIFE-Child are funded by the Leipzig Research Center for Civilization Diseases (LIFE). LIFE is an organizational unit affiliated to the Medical Faculty of the University of Leipzig. LIFE is funded by means of the European Union, by the European Regional Development Fund (ERDF) and by funds of the Free State of

Saxony within the framework of the excellence initiative.

**Lifelines**

The Lifelines Cohort Study, and generation and management of GWAS genotype data for the Lifelines Cohort Study is supported by the Netherlands Organization of Scientific Research NWO (grant 175.010.2007.006), the Economic Structure Enhancing Fund (FES) of the Dutch government, the Ministry of Economic Affairs, the Ministry of Education, Culture and Science, the Ministry for Health, Welfare and Sports, the Northern Netherlands Collaboration of Provinces (SNN), the Province of Groningen, University Medical Center Groningen, the University of Groningen, Dutch Kidney Foundation and Dutch Diabetes Research Foundation. The authors wish to acknowledge the services of the Lifelines Cohort Study, the contributing research centers delivering data to Lifelines, and all the study participants.

**Living-biobank**

The genotyping was funded by the Agency for Science, Technology and Research, Singapore (<https://www.a-star.edu.sg/>), and by Merck Sharp & Dohme Corp., Whitehouse Station, NJ USA (<http://www.merck.com>). The participants were from the MEC study (funded by the Biomedical Research Council (BMRC 03/1/27/18/216), National Medical Research Council (0838/2004), National Research Foundation (through BMRC 05/1/21/19/425 and 11/1/21/19/678), Ministry of Health, Singapore, National University of Singapore and National University Health System, Singapore), and The SH2012 study (funded by the Ministry of Health, Singapore, National University of Singapore and National University Health System, Singapore).

**MESA**

MESA and the MESA SHARe project are conducted and supported by the National Heart, Lung, and Blood Institute (NHLBI) in collaboration with MESA investigators. Support for MESA is provided by contracts HHSN268201500003I, N01-HC-95159, N01-HC-95160, N01-HC-95161, N01-HC-95162, N01-HC-95163, N01-HC-95164, N01-HC-95165, N01-HC-95166, N01-HC-95167, N01-HC-95168, N01-HC-95169, UL1-TR-000040, UL1-TR-001079, UL1-TR-001420, UL1-TR-001881, and DK063491. MESA Family is conducted and supported by the National Heart, Lung, and Blood Institute (NHLBI) in collaboration with MESA investigators. Support is provided by grants and contracts R01HL071051, R01HL071205, R01HL071250, R01HL071251, R01HL071258, R01HL071259, by the National Center for Research Resources, Grant UL1RR033176, and the National Center for Advancing Translational Sciences, Grant UL1TR001881. This publication was developed under a STAR research assistance agreement, No. RD831697 (MESA Air), awarded by the U.S Environmental protection Agency. It has not been formally reviewed by the EPA. The views expressed in this document are solely those of the authors and the EPA does not endorse any products or commercial services mentioned in this publication.

**MICROS**

We thank all study participants, all primary care practitioners, and the personnel of the Hospital of Silandro (Department of Laboratory Medicine) for their participation and collaboration in the research project. The study was supported by the Ministry of Health and Department of Educational Assistance, University and Research of the Autonomous Province of Bolzano, the South Tyrolean Sparkasse Foundation, and the European Union framework program 6 EUROSPAN project (contract no. LSHG-CT-2006-018947).

**MyCode (Geisinger)**

We would like to acknowledge the participants, staff, and our colleagues associated with the Geisinger MyCode Community Health Initiative. We also thank the staff of the PACDC of Geisinger for assistance with the phenotypic data, and the staff of the Biomedical & Translational Informatics and Kidney Health Research Institute.

**NEO**

The authors of the NEO study thank all individuals who participated in the Netherlands Epidemiology in Obesity study, all participating general practitioners

for inviting eligible participants and all research nurses for collection of the data. We thank the NEO study group, Pat van Beelen, Petra Noordijk and Ingeborg de Jonge for the coordination, lab and data management of the NEO study. The genotyping in the NEO study was supported by the Centre National de Génotypage (Paris, France), headed by Jean-Francois Deleuze. The NEO study is supported by the participating Departments, the Division and the Board of Directors of the Leiden University Medical Center, and by the Leiden University, Research Profile Area Vascular and Regenerative Medicine. Dennis Mook-Kanamori is supported by Dutch Science Organization (ZonMW-VENI Grant 916.14.023).

**PIVUS** The PIVUS study was supported by Wellcome Trust grants WT098017, WT064890, WT090532, Uppsala University, Uppsala University Hospital, the Swedish Research Council and the Swedish Heart-Lung Foundation. Cecilia M. Lindgren is supported by the Li Ka Shing Foundation, WT-SSI/John Fell funds and by the NIHR Biomedical Research Centre, Oxford, by Widenlife and NIH (5P50HD028138-27). Johan Ärnlöv was supported by The Swedish Research Council, Swedish Heart-Lung Foundation, Dalarna University and Uppsala University

**POPGEN** The PopGen 2.0 network was supported by a grant from the German Ministry for Education and Research (01EY1103). Sandra Freitag-Wolf was supported by German Research Foundation, Clusters of Excellence 306, Inflammation at Interfaces.

**PREVEND** The Prevention of Renal and Vascular Endstage Disease Study (PREVEND) genetics is supported by the Dutch Kidney Foundation (Grant E033), the EU project grant GENEURE (FP-6 LSHM CT 2006 037697), the National Institutes of Health (grant LM010098), the Netherlands organization for health research and development (NWO VENI grant 916.761.70), and the Dutch Inter University Cardiology Institute Netherlands (ICIN). Niek Verweij was supported by NWO VENI grant 016.186.125.

**RS** The Rotterdam Study (RS) has been approved by the Medical Ethics Committee of the Erasmus MC (registration number MEC 02.1015) and by the Dutch Ministry of Health, Welfare and Sport (Population Screening Act WBO, license number 1071272-159521-PG). The RS has been entered into the Netherlands National Trial Register (NTR; [www.trialregister.nl](http://www.trialregister.nl)) and into the WHO International Clinical Trials Registry Platform (ICTRP; [www.who.int/ictrp/network/primary/en/](http://www.who.int/ictrp/network/primary/en/)) under shared catalogue number NTR6831. All participants provided written informed consent to participate in the study and to have their information obtained from treating physicians. The generation and management of GWAS genotype data for the RS (RS I, RS II, RS III) was executed by the Human Genotyping Facility of the Genetic Laboratory of the Department of Internal Medicine, Erasmus MC, Rotterdam, The Netherlands. The GWAS datasets are supported by the Netherlands Organisation of Scientific Research NWO Investments (nr. 175.010.2005.011, 911-03-012), the Genetic Laboratory of the Department of Internal Medicine, Erasmus MC, the Research Institute for Diseases in the Elderly (014-93-015; RIDE2), the Netherlands Genomics Initiative (NGI)/Netherlands Organisation for Scientific Research (NWO) Netherlands Consortium for Healthy Aging (NCHA), project nr. 050-060-810. We thank Pascal Arp, Mila Jhamai, Marijn Verkerk, Lizbeth Herrera and Marjolein Peters, MSc, and Carolina Medina-Gomez, MSc, for their help in creating the GWAS database, and Karol Estrada, PhD, Yurii Aulchenko, PhD, and Carolina Medina-Gomez, MSc, for the creation and analysis of imputed data. The RS is funded by Erasmus Medical Center and Erasmus University, Rotterdam, Netherlands Organization for the Health Research and Development (ZonMw), the Research Institute for Diseases in the Elderly (RIDE), the Ministry of Education, Culture and Science, the Ministry for Health, Welfare and Sports, the European Commission (DG XII), and the Municipality of Rotterdam. The authors are grateful to the study participants, the staff from the RS and the participating general

practitioners and pharmacists.

- SCES** The Singapore Chinese Eye Study (SCES) was supported by grants from the National Medical Research Council (STaR/0003/2008), the Singapore Bio Imaging Consortium (C-011/2006) and the Biomedical Research Council (08/1/35/19/550). The Genome Institute of Singapore provided services for genotyping.
- SHIP/SHIP-Trend** SHIP is part of the Community Medicine Research net of the University of Greifswald, Germany, which is funded by the Federal Ministry of Education and Research (grants no. 01ZZ9603, 01ZZ0103, and 01ZZ0403), the Ministry of Cultural Affairs as well as the Social Ministry of the Federal State of Mecklenburg-West Pomerania, and the network 'Greifswald Approach to Individualized Medicine (GANI\_MED)' funded by the Federal Ministry of Education and Research (grant 03IS2061A). Genome-wide data have been supported by the Federal Ministry of Education and Research (grant no. 03ZIK012) and a joint grant from Siemens Healthineers, Erlangen, Germany and the Federal State of Mecklenburg- West Pomerania. The University of Greifswald is a member of the Caché Campus program of the InterSystems GmbH.
- SiMES** The Singapore Malay Eye Study (SiMES) was funded by the National Medical Research Council (NMRC 0796/2003 and NMRC/STaR/0003/2008) and Biomedical Research Council (BMRC, 09/1/35/19/616). The Genome Institute of Singapore provided services for genotyping.
- SINDI** The Singapore Indian Eye Study (SINDI) was funded by grants from the Biomedical Research Council of Singapore (BMRC 09/1/35/19/616 and 08/1/35/19/550), and the National Medical Research Council of Singapore (NMRC/STaR/0003/2008). The Genome Institute of Singapore provided services for genotyping.
- SKIPOGH** The SKIPOGH study was supported by a Swiss national science foundation grant (FN33CM30-124087 and FN33CM30-140331), by the Swiss National Centres of Competence in Research Kidney and TransCure.
- Sorbs** This work was supported by grants from the German Research Foundation (SFB-1052 "Obesity mechanisms" A01, B03, SPP 1629 TO 718/2- 1), from the German Diabetes Association, from the DHFD (Diabetes Hilfs- und Forschungsfonds Deutschland) and from IFB Adiposity Diseases (AD2-060E, AD2-06E95, AD2-06E99). IFB Adiposity Diseases is supported by the Federal Ministry of Education and Research (BMBF), Germany, FKZ: 01EO1501.
- SP2** The Singapore Prospective Study Program (SP2) were supported by the individual research grant and clinician scientist award schemes from the National Medical Research Council (NMRC) and the Biomedical Research Council (BMRC) of Singapore. The Genome Institute of Singapore provided services for genotyping.
- ULSAM** The ULSAM study was supported by Wellcome Trust grants WT098017, WT064890, WT090532, Uppsala University, Uppsala University Hospital, the Swedish Research Council and the Swedish Heart-Lung Foundation. Johan Ärnlöv was supported by The Swedish Research Council, Swedish Heart-Lung Foundation, Dalarna University and Uppsala University.
- Vanderbilt** Otis Wilson & Adriana Hung were also supported by the Vanderbilt Center for Kidney Disease and Division of Nephrology & Hypertension. Ayush Giri is supported by the Building Interdisciplinary Research Careers in Women's Health career development program's 2K12HD043483-17 (PI: Katherine E Hartmann).
- Veterans Affairs** This work was supported by the Department Veterans Affairs MVP grant BX003360 (Hung). Ayush Giri, and Adriana M. Hung were supported by BX003360 and CX000982. This research is based on data from the Million Veteran Program, Office of Research and Development, Veterans Health Administration. Phecodes creation

was supported using resources and facilities of the VA Informatics and Computing Infrastructure (VINCI), VA HSR RES 13-457.

**Functional studies** T.H. was supported by a grant from the Deutsche Forschungsgemeinschaft (DFG) (HE 7456/3-1).

### **Lifelines Cohort Study: group author genetics acknowledgement**

Behrooz Z Alizadeh (1), H Marika Boezen (1), Lude Franke (2), Pim van der Harst (3), Gerjan Navis (4), Marianne G. Rots (5), Morris Swertz (2), Bruce HR Wolffenbuttel (6), Cisca Wijmenga (2)

- (1) Department of Epidemiology, University of Groningen, University Medical Center Groningen, The Netherlands
- (2) Department of Genetics, University of Groningen, University Medical Center Groningen, The Netherlands
- (3) Department of Cardiology, University of Groningen, University Medical Center Groningen, The Netherlands
- (4) Department of Internal Medicine, Division of Nephrology, University of Groningen, University Medical Center Groningen, The Netherlands
- (5) Department of Pathology and Medical Biology, University of Groningen, University Medical Center Groningen, The Netherlands
- (6) Department of Endocrinology, University of Groningen, University Medical Center Groningen, The Netherlands

### **Million Veteran Program: consortium acknowledgement**

#### **MVP Executive Committee**

- Co-Chair: J. Michael Gaziano, M.D., M.P.H.
- Co-Chair: Rachel Ramoni, D.M.D., Sc.D.
- Jim Breeling, M.D. (ex-officio)
- Kyong-Mi Chang, M.D.
- Grant Huang, Ph.D.
- Sumitra Muralidhar, Ph.D.
- Christopher J. O'Donnell, M.D., M.P.H.
- Philip S. Tsao, Ph.D.

#### **MVP Program Office**

- Sumitra Muralidhar, Ph.D.
- Jennifer Moser, Ph.D.

#### **MVP Recruitment/Enrollment**

- Recruitment/Enrollment Director/Deputy Director, Boston – Stacey B. Whitbourne, Ph.D.; Jessica V. Brewer, M.P.H.
- MVP Coordinating Centers
  - Clinical Epidemiology Research Center (CERC), West Haven – John Concato, M.D., M.P.H.
  - Cooperative Studies Program Clinical Research Pharmacy Coordinating Center, Albuquerque - Stuart Warren, J.D., Pharm D.; Dean P. Argyres, M.S.
  - Genomics Coordinating Center, Palo Alto – Philip S. Tsao, Ph.D.
  - Massachusetts Veterans Epidemiology Research Information Center (MAVERIC), Boston - J. Michael Gaziano, M.D., M.P.H.
  - MVP Information Center, Canandaigua – Brady Stephens, M.S.
- Core Biorepository, Boston – Mary T. Brophy M.D., M.P.H.; Donald E. Humphries, Ph.D.
- MVP Informatics, Boston – Nhan Do, M.D.; Shahpoor Shayan

- Data Operations/Analytics, Boston – Xuan-Mai T. Nguyen, Ph.D.

### **MVP Science**

- Genomics - Christopher J. O'Donnell, M.D., M.P.H.; Saiju Pyarajan Ph.D.; Philip S. Tsao, Ph.D.
- Phenomics - Kelly Cho, M.P.H, Ph.D.
- Data and Computational Sciences – Saiju Pyarajan, Ph.D.
- Statistical Genetics – Elizabeth Hauser, Ph.D.; Yan Sun, Ph.D.; Hongyu Zhao, Ph.D.

### **MVP Local Site Investigators**

- Atlanta VA Medical Center (Peter Wilson)
- Bay Pines VA Healthcare System (Rachel McArdle)
- Birmingham VA Medical Center (Louis Dellitalia)
- Cincinnati VA Medical Center (John Harley)
- Clement J. Zablocki VA Medical Center (Jeffrey Whittle)
- Durham VA Medical Center (Jean Beckham)
- Edith Nourse Rogers Memorial Veterans Hospital (John Wells)
- Edward Hines, Jr. VA Medical Center (Salvador Gutierrez)
- Fayetteville VA Medical Center (Gretchen Gibson)
- VA Health Care Upstate New York (Laurence Kaminsky)
- New Mexico VA Health Care System (Gerardo Villareal)
- VA Boston Healthcare System (Scott Kinlay)
- VA Western New York Healthcare System (Junzhe Xu)
- Ralph H. Johnson VA Medical Center (Mark Hamner)
- Wm. Jennings Bryan Dorn VA Medical Center (Kathlyn Sue Haddock)
- VA North Texas Health Care System (Sujata Bhushan)
- Hampton VA Medical Center (Pran Iruvanti)
- Hunter Holmes McGuire VA Medical Center (Michael Godschalk)
- Iowa City VA Health Care System (Zuhair Ballas)
- Jack C. Montgomery VA Medical Center (Malcolm Buford)
- James A. Haley Veterans' Hospital (Stephen Mastorides)
- Louisville VA Medical Center (Jon Klein)
- Manchester VA Medical Center (Nora Ratcliffe)
- Miami VA Health Care System (Hermes Florez)
- Michael E. DeBakey VA Medical Center (Alan Swann)
- Minneapolis VA Health Care System (Maureen Murdoch)
- N. FL/S. GA Veterans Health System (Peruvemba Sriram)
- Northport VA Medical Center (Shing Shing Yeh)
- Overton Brooks VA Medical Center (Ronald Washburn)
- Philadelphia VA Medical Center (Darshana Jhala)
- Phoenix VA Health Care System (Samuel Aguayo)
- Portland VA Medical Center (David Cohen)
- Providence VA Medical Center (Satish Sharma)
- Richard Roudebush VA Medical Center (John Callaghan)
- Salem VA Medical Center (Kris Ann Oursler)
- San Francisco VA Health Care System (Mary Whooley)
- South Texas Veterans Health Care System (Sunil Ahuja)
- Southeast Louisiana Veterans Health Care System (Amparo Gutierrez)
- Current as of 19-JUL-2018
- Southern Arizona VA Health Care System (Ronald Schiffman)
- Sioux Falls VA Health Care System (Jennifer Greco)
- St. Louis VA Health Care System (Michael Rauchman)
- Syracuse VA Medical Center (Richard Servatius)
- VA Eastern Kansas Health Care System (Mary Oehlert)

- VA Greater Los Angeles Health Care System (Agnes Wallbom)
- VA Loma Linda Healthcare System (Ronald Fernando)
- VA Long Beach Healthcare System (Timothy Morgan)
- VA Maine Healthcare System (Todd Stapley)
- VA New York Harbor Healthcare System (Scott Sherman)
- VA Pacific Islands Health Care System (Gwenevere Anderson)
- VA Palo Alto Health Care System (Philip Tsao)
- VA Pittsburgh Health Care System (Elif Sonel)
- VA Puget Sound Health Care System (Edward Boyko)
- VA Salt Lake City Health Care System (Laurence Meyer)
- VA San Diego Healthcare System (Samir Gupta)
- VA Southern Nevada Healthcare System (Joseph Fayad)
- VA Tennessee Valley Healthcare System (Adriana Hung)
- Washington DC VA Medical Center (Jack Lichy)
- W.G. (Bill) Hefner VA Medical Center (Robin Hurley)
- White River Junction VA Medical Center (Brooks Robey)
- William S. Middleton Memorial Veterans Hospital (Robert Striker)

## MEGASTROKE CONSORTIUM

Rainer Malik <sup>1</sup>, Ganesh Chauhan <sup>2</sup>, Matthew Traylor <sup>3</sup>, Muralidharan Sargurupremraj <sup>4,5</sup>, Yukinori Okada <sup>6,7,8</sup>, Aniket Mishra <sup>4,5</sup>, Loes Rutten-Jacobs <sup>3</sup>, Anne-Katrin Giese <sup>9</sup>, Sander W van der Laan <sup>10</sup>, Solveig Gretarsdottir <sup>11</sup>, Christopher D Anderson <sup>12,13,14,14</sup>, Michael Chong <sup>15</sup>, Hieab HH Adams <sup>16,17</sup>, Tetsuro Ago <sup>18</sup>, Peter Almgren <sup>19</sup>, Philippe Amouyel <sup>20,21</sup>, Hakan Ay <sup>22,13</sup>, Traci M Bartz <sup>23</sup>, Oscar R Benavente <sup>24</sup>, Steve Bevan <sup>25</sup>, Giorgio B Boncoraglio <sup>26</sup>, Robert D Brown, Jr. <sup>27</sup>, Adam S Butterworth <sup>28,29</sup>, Caty Carrera <sup>30,31</sup>, Cara L Carty <sup>32,33</sup>, Daniel I Chasman <sup>34,35</sup>, Wei-Min Chen <sup>36</sup>, John W Cole <sup>37</sup>, Adolfo Correa <sup>38</sup>, Ioana Cotlarciuc <sup>39</sup>, Carlos Cruchaga <sup>40,41</sup>, John Danesh <sup>28,42,43,44</sup>, Paul IW de Bakker <sup>45,46</sup>, Anita L DeStefano <sup>47,48</sup>, Marcel den Hoed <sup>49</sup>, Qing Duan <sup>50</sup>, Stefan T Engelter <sup>51,52</sup>, Guido J Falcone <sup>53,54</sup>, Rebecca F Gottesman <sup>55</sup>, Raji P Grewal <sup>56</sup>, Vilmundur Gudnason <sup>57,58</sup>, Stefan Gustafsson <sup>59</sup>, Jeffrey Haessler <sup>60</sup>, Tamara B Harris <sup>61</sup>, Ahamad Hassan <sup>62</sup>, Aki S Havulinna <sup>63,64</sup>, Susan R Heckbert <sup>65</sup>, Elizabeth G Holliday <sup>66,67</sup>, George Howard <sup>68</sup>, Fang-Chi Hsu <sup>69</sup>, Hyacinth I Hyacinth <sup>70</sup>, M Arfan Ikram <sup>16</sup>, Erik Ingelsson <sup>71,72</sup>, Marguerite R Irvin <sup>73</sup>, Xueqiu Jian <sup>74</sup>, Jordi Jiménez-Conde <sup>75</sup>, Julie A Johnson <sup>76,77</sup>, J Wouter Jukema <sup>78</sup>, Masahiro Kanai <sup>6,7,79</sup>, Keith L Keene <sup>80,81</sup>, Brett M Kissela <sup>82</sup>, Dawn O Kleindorfer <sup>82</sup>, Charles Kooperberg <sup>60</sup>, Michiaki Kubo <sup>83</sup>, Leslie A Lange <sup>84</sup>, Carl D Langefeld <sup>85</sup>, Claudia Langenberg <sup>86</sup>, Lenore J Launer <sup>87</sup>, Jin-Moo Lee <sup>88</sup>, Robin Lemmens <sup>89,90</sup>, Didier Leys <sup>91</sup>, Cathryn M Lewis <sup>92,93</sup>, Wei-Yu Lin <sup>28,94</sup>, Arne G Lindgren <sup>95,96</sup>, Erik Lorentzen <sup>97</sup>, Patrik K Magnusson <sup>98</sup>, Jane Maguire <sup>99</sup>, Ani Manichaikul <sup>36</sup>, Patrick F McArdle <sup>100</sup>, James F Meschia <sup>101</sup>, Braxton D Mitchell <sup>100,102</sup>, Thomas H Mosley <sup>103,104</sup>, Michael A Nalls <sup>105,106</sup>, Toshiharu Ninomiya <sup>107</sup>, Martin J O'Donnell <sup>15,108</sup>, Bruce M Psaty <sup>109,110,111,112</sup>, Sara L Pulit <sup>113,45</sup>, Kristiina Rannikmäe <sup>114,115</sup>, Alexander P Reiner <sup>65,116</sup>, Kathryn M Rexrode <sup>117</sup>, Kenneth Rice <sup>118</sup>, Stephen S Rich <sup>36</sup>, Paul M Ridker <sup>34,35</sup>, Natalia S Rost <sup>9,13</sup>, Peter M Rothwell <sup>119</sup>, Jerome I Rotter <sup>120,121</sup>, Tatjana Rundek <sup>122</sup>, Ralph L Sacco <sup>122</sup>, Saori Sakaue <sup>7,123</sup>, Michele M Sale <sup>124</sup>, Veikko Salomaa <sup>63</sup>, Bishwa R Sapkota <sup>125</sup>, Reinhold Schmidt <sup>126</sup>, Carsten O Schmidt <sup>127</sup>, Ulf Schminke <sup>128</sup>, Pankaj Sharma <sup>39</sup>, Agnieszka Slowik <sup>129</sup>, Cathie LM Sudlow <sup>114,115</sup>, Christian Tanislav <sup>130</sup>, Turgut Tatlisumak <sup>131,132</sup>, Kent D Taylor <sup>120,121</sup>, Vincent NS Thijs <sup>133,134</sup>, Gudmar Thorleifsson <sup>11</sup>, Unnur Thorsteinsdottir <sup>11</sup>, Steffen Tiedt <sup>1</sup>, Stella Trompet <sup>135</sup>, Christophe Tzourio <sup>5,136,137</sup>, Cornelia M van Duijn <sup>138,139</sup>, Matthew Walters <sup>140</sup>, Nicholas J Wareham <sup>86</sup>, Sylvia Wassertheil-Smoller <sup>141</sup>, James G Wilson <sup>142</sup>, Kerri L Wiggins <sup>109</sup>, Qiong Yang <sup>47</sup>, Salim Yusuf <sup>15</sup>, Najaf Amin <sup>16</sup>, Hugo S Aparicio <sup>185,48</sup>, Donna K Arnett <sup>186</sup>, John Attia <sup>187</sup>, Alexa S Beiser <sup>47,48</sup>, Claudine Berr <sup>188</sup>, Julie E Buring <sup>34,35</sup>, Mariana Bustamante <sup>189</sup>, Valeria Caso <sup>190</sup>, Yu-Ching Cheng <sup>191</sup>, Seung Hoan Choi <sup>192,48</sup>, Ayesha Chowhan <sup>185,48</sup>, Natalia Cullell <sup>31</sup>, Jean-François Dartigues <sup>193,194</sup>, Hossein Delavaran <sup>95,96</sup>, Pilar Delgado <sup>195</sup>, Marcus Dörr <sup>196,197</sup>, Gunnar Engström <sup>19</sup>, Ian Ford <sup>198</sup>, Wander S Gurpreet <sup>199</sup>, Anders Hamsten <sup>200,201</sup>, Laura Heitsch <sup>202</sup>, Atsushi Hozawa <sup>203</sup>, Laura Ibanez <sup>204</sup>, Andreea Ilinca <sup>95,96</sup>, Martin Ingelsson <sup>205</sup>, Motoki Iwasaki <sup>206</sup>, Rebecca D Jackson <sup>207</sup>, Katarina Jood <sup>208</sup>, Pekka Jousilahti <sup>63</sup>, Sara Kaffashian <sup>4,5</sup>, Lalit Kalra <sup>209</sup>, Masahiro Kamouchi <sup>210</sup>, Takanari Kitazono <sup>211</sup>, Olafur Kjartansson <sup>212</sup>, Manja

Kloss <sup>213</sup>, Peter J Koudstaal <sup>214</sup>, Jerzy Krupinski <sup>215</sup>, Daniel L Labovitz <sup>216</sup>, Cathy C Laurie <sup>118</sup>, Christopher R Levi <sup>217</sup>, Linxin Li <sup>218</sup>, Lars Lind <sup>219</sup>, Cecilia M Lindgren <sup>220,221</sup>, Vasileios Lioutas <sup>222,48</sup>, Yong Mei Liu <sup>223</sup>, Oscar L Lopez <sup>224</sup>, Hirata Makoto <sup>225</sup>, Nicolas Martinez-Majander <sup>172</sup>, Koichi Matsuda <sup>225</sup>, Naoko Minegishi <sup>203</sup>, Joan Montaner <sup>226</sup>, Andrew P Morris <sup>227,228</sup>, Elena Muiño <sup>31</sup>, Martina Müller-Nurasyid <sup>229,230,231</sup>, Bo Norrving <sup>95,96</sup>, Soichi Ogishima <sup>203</sup>, Eugenio A Parati <sup>232</sup>, Leema Reddy Peddareddygar <sup>56</sup>, Nancy L Pedersen <sup>98,233</sup>, Joanna Pera <sup>129</sup>, Markus Perola <sup>63,234</sup>, Alessandro Pezzini <sup>235</sup>, Silvana Pileggi <sup>236</sup>, Raquel Rabionet <sup>237</sup>, Iolanda Ribalena <sup>30</sup>, Marta Ribasés <sup>238</sup>, Jose R Romero <sup>185,48</sup>, Jaume Roquer <sup>239,240</sup>, Anthony G Rudd <sup>241,242</sup>, Antti-Pekka Sarin <sup>243,244</sup>, Ralhan Sarju <sup>199</sup>, Chloe Sarnowski <sup>47,48</sup>, Makoto Sasaki <sup>245</sup>, Claudia L Satizabal <sup>185,48</sup>, Mamoru Satoh <sup>245</sup>, Naveed Sattar <sup>246</sup>, Norie Sawada <sup>206</sup>, Gerli Sibolt <sup>172</sup>, Ásgeir Sigurdsson <sup>247</sup>, Albert Smith <sup>248</sup>, Kenji Sobue <sup>245</sup>, Carolina Soriano-Tárraga <sup>240</sup>, Tara Stanne <sup>249</sup>, O Colin Stine <sup>250</sup>, David J Stott <sup>251</sup>, Konstantin Strauch <sup>229,252</sup>, Takako Takai <sup>203</sup>, Hideo Tanaka <sup>253,254</sup>, Kozo Tanno <sup>245</sup>, Alexander Teumer <sup>255</sup>, Liisa Tomppo <sup>172</sup>, Nuria P Torres-Aguila <sup>31</sup>, Emmanuel Touze <sup>256,257</sup>, Shoichiro Tsugane <sup>206</sup>, Andre G Uitterlinden <sup>258</sup>, Einar M Valdimarsson <sup>259</sup>, Sven J van der Lee <sup>16</sup>, Henry Völzke <sup>255</sup>, Kenji Wakai <sup>253</sup>, David Weir <sup>260</sup>, Stephen R Williams <sup>261</sup>, Charles DA Wolfe <sup>241,242</sup>, Quenna Wong <sup>118</sup>, Huichun Xu <sup>191</sup>, Taiki Yamaji <sup>206</sup>, Dharambir K Sanghera <sup>125,169,170</sup>, Olle Melander <sup>19</sup>, Christina Jern <sup>171</sup>, Daniel Strbian <sup>172,173</sup>, Israel Fernandez-Cadenas <sup>31,30</sup>, W T Longstreth, Jr <sup>174,65</sup>, Arndt Rolfs <sup>175</sup>, Jun Hata <sup>107</sup>, Daniel Woo <sup>82</sup>, Jonathan Rosand <sup>12,13,14</sup>, Guillaume Pare <sup>15</sup>, Jemma C Hopewell <sup>176</sup>, Danish Saleheen <sup>177</sup>, Kari Stefansson <sup>11,178</sup>, Bradford B Worrall <sup>179</sup>, Steven J Kittner <sup>37</sup>, Sudha Seshadri <sup>180,48</sup>, Myriam Fornage <sup>74,181</sup>, Hugh S Markus <sup>3</sup>, Joanna MM Howson <sup>28</sup>, Yoichiro Kamatani <sup>6,182</sup>, Stephanie Debette <sup>4,5</sup>, Martin Dichgans <sup>1,183,184</sup>

1 Institute for Stroke and Dementia Research (ISD), University Hospital, LMU Munich, Munich, Germany

2 Centre for Brain Research, Indian Institute of Science, Bangalore, India

3 Stroke Research Group, Division of Clinical Neurosciences, University of Cambridge, UK

4 INSERM U1219 Bordeaux Population Health Research Center, Bordeaux, France

5 University of Bordeaux, Bordeaux, France

6 Laboratory for Statistical Analysis, RIKEN Center for Integrative Medical Sciences, Yokohama, Japan

7 Department of Statistical Genetics, Osaka University Graduate School of Medicine, Osaka, Japan

8 Laboratory of Statistical Immunology, Immunology Frontier Research Center (WPI-IFReC), Osaka University, Suita, Japan.

9 Department of Neurology, Massachusetts General Hospital, Harvard Medical School, Boston, MA, USA

10 Laboratory of Experimental Cardiology, Division of Heart and Lungs, University Medical Center Utrecht, University of Utrecht, Utrecht, Netherlands

11 deCODE genetics/AMGEN inc, Reykjavik, Iceland

12 Center for Genomic Medicine, Massachusetts General Hospital (MGH), Boston, MA, USA

13 J. Philip Kistler Stroke Research Center, Department of Neurology, MGH, Boston, MA, USA

14 Program in Medical and Population Genetics, Broad Institute, Cambridge, MA, USA

15 Population Health Research Institute, McMaster University, Hamilton, Canada

16 Department of Epidemiology, Erasmus University Medical Center, Rotterdam, Netherlands

17 Department of Radiology and Nuclear Medicine, Erasmus University Medical Center, Rotterdam, Netherlands

18 Department of Medicine and Clinical Science, Graduate School of Medical Sciences, Kyushu University, Fukuoka, Japan

19 Department of Clinical Sciences, Lund University, Malmö, Sweden

20 Univ. Lille, Inserm, Institut Pasteur de Lille, LabEx DISTALZ-UMR1167, Risk factors and molecular determinants of aging-related diseases, F-59000 Lille, France

21 Centre Hosp. Univ Lille, Epidemiology and Public Health Department, F-59000 Lille, France

22 AA Martinos Center for Biomedical Imaging, Department of Radiology, Massachusetts General Hospital, Harvard Medical School, Boston, MA, USA

23 Cardiovascular Health Research Unit, Departments of Biostatistics and Medicine, University of Washington, Seattle, WA, USA

24 Division of Neurology, Faculty of Medicine, Brain Research Center, University of British Columbia, Vancouver, Canada

25 School of Life Science, University of Lincoln, Lincoln, UK

26 Department of Cerebrovascular Diseases, Fondazione IRCCS Istituto Neurologico "Carlo Besta", Milano, Italy

27 Department of Neurology, Mayo Clinic Rochester, Rochester, MN, USA

28 MRC/BHF Cardiovascular Epidemiology Unit, Department of Public Health and Primary Care, University of Cambridge, Cambridge, UK

29 The National Institute for Health Research Blood and Transplant Research Unit in Donor Health and Genomics, University of Cambridge, UK

30 Neurovascular Research Laboratory, Vall d'Hebron Institut of Research, Neurology and Medicine Departments-Universitat Autònoma de Barcelona, Vall d'Hebrón Hospital, Barcelona, Spain

31 Stroke Pharmacogenomics and Genetics, Fundacio Docència i Recerca MutuaTerrassa, Terrassa, Spain

32 Children's Research Institute, Children's National Medical Center, Washington, DC, USA

33 Center for Translational Science, George Washington University, Washington, DC, USA

34 Division of Preventive Medicine, Brigham and Women's Hospital, Boston, MA, USA

35 Harvard Medical School, Boston, MA, USA

36 Center for Public Health Genomics, Department of Public Health Sciences, University of Virginia, Charlottesville, VA, USA

37 Department of Neurology, University of Maryland School of Medicine and Baltimore VAMC, Baltimore, MD, USA

38 Departments of Medicine, Pediatrics and Population Health Science, University of Mississippi Medical Center, Jackson, MS, USA

39 Institute of Cardiovascular Research, Royal Holloway University of London, UK & Ashford and St Peters Hospital, Surrey UK

40 Department of Psychiatry, The Hope Center Program on Protein Aggregation and Neurodegeneration (HPAN), Washington University, School of Medicine, St. Louis, MO, USA

41 Department of Developmental Biology, Washington University School of Medicine, St. Louis, MO, USA

42 NIHR Blood and Transplant Research Unit in Donor Health and Genomics, Department of Public Health and Primary Care, University of Cambridge, Cambridge, UK

43 Wellcome Trust Sanger Institute, Wellcome Trust Genome Campus, Hinxton, Cambridge, UK

44 British Heart Foundation, Cambridge Centre of Excellence, Department of Medicine, University of Cambridge, Cambridge, UK

45 Department of Medical Genetics, University Medical Center Utrecht, Utrecht, Netherlands

46 Department of Epidemiology, Julius Center for Health Sciences and Primary Care, University Medical Center Utrecht, Utrecht, Netherlands

47 Boston University School of Public Health, Boston, MA, USA



48 Framingham Heart Study, Framingham, MA, USA  
49 Department of Immunology, Genetics and Pathology and Science for Life Laboratory, Uppsala University, Uppsala, Sweden  
50 Department of Genetics, University of North Carolina, Chapel Hill, NC, USA  
51 Department of Neurology and Stroke Center, Basel University Hospital, Switzerland  
52 Neurorehabilitation Unit, University and University Center for Medicine of Aging and Rehabilitation Basel, Felix Platter Hospital, Basel, Switzerland  
53 Department of Neurology, Yale University School of Medicine, New Haven, CT, USA  
54 Program in Medical and Population Genetics, The Broad Institute of Harvard and MIT, Cambridge, MA, USA  
55 Department of Neurology, Johns Hopkins University School of Medicine, Baltimore, MD, USA  
56 Neuroscience Institute, SF Medical Center, Trenton, NJ, USA  
57 Icelandic Heart Association Research Institute, Kopavogur, Iceland  
58 University of Iceland, Faculty of Medicine, Reykjavik, Iceland  
59 Department of Medical Sciences, Molecular Epidemiology and Science for Life Laboratory, Uppsala University, Uppsala, Sweden  
60 Division of Public Health Sciences, Fred Hutchinson Cancer Research Center, Seattle, WA, USA  
61 Laboratory of Epidemiology and Population Science, National Institute on Aging, National Institutes of Health, Bethesda, MD, USA  
62 Department of Neurology, Leeds General Infirmary, Leeds Teaching Hospitals NHS Trust, Leeds, UK  
63 National Institute for Health and Welfare, Helsinki, Finland  
64 FIMM - Institute for Molecular Medicine Finland, Helsinki, Finland  
65 Department of Epidemiology, University of Washington, Seattle, WA, USA  
66 Public Health Stream, Hunter Medical Research Institute, New Lambton, Australia  
67 Faculty of Health and Medicine, University of Newcastle, Newcastle, Australia  
68 School of Public Health, University of Alabama at Birmingham, Birmingham, AL, USA  
69 Department of Biostatistical Sciences, Wake Forest School of Medicine, Winston-Salem, NC, USA  
70 Aflac Cancer and Blood Disorder Center, Department of Pediatrics, Emory University School of Medicine, Atlanta, GA, USA  
71 Department of Medicine, Division of Cardiovascular Medicine, Stanford University School of Medicine, CA, USA  
72 Department of Medical Sciences, Molecular Epidemiology and Science for Life Laboratory, Uppsala University, Uppsala, Sweden  
73 Epidemiology, School of Public Health, University of Alabama at Birmingham, USA  
74 Brown Foundation Institute of Molecular Medicine, University of Texas Health Science Center at Houston, Houston, TX, USA  
75 Neurovascular Research Group (NEUVAS), Neurology Department, Institut Hospital del Mar d'Investigació Mèdica, Universitat Autònoma de Barcelona, Barcelona, Spain  
76 Department of Pharmacotherapy and Translational Research and Center for Pharmacogenomics, University of Florida, College of Pharmacy, Gainesville, FL, USA  
77 Division of Cardiovascular Medicine, College of Medicine, University of Florida, Gainesville, FL, USA  
78 Department of Cardiology, Leiden University Medical Center, Leiden, the Netherlands  
79 Program in Bioinformatics and Integrative Genomics, Harvard Medical School, Boston, MA, USA  
80 Department of Biology, East Carolina University, Greenville, NC, USA  
81 Center for Health Disparities, East Carolina University, Greenville, NC, USA  
82 University of Cincinnati College of Medicine, Cincinnati, OH, USA  
83 RIKEN Center for Integrative Medical Sciences, Yokohama, Japan  
84 Department of Medicine, University of Colorado Denver, Anschutz Medical Campus, Aurora, CO, USA  
85 Center for Public Health Genomics and Department of Biostatistical Sciences, Wake Forest School of Medicine, Winston-Salem, NC, USA  
86 MRC Epidemiology Unit, University of Cambridge School of Clinical Medicine, Institute of Metabolic Science, Cambridge Biomedical Campus, Cambridge, UK  
87 Intramural Research Program, National Institute on Aging, National Institutes of Health, Bethesda, MD, USA  
88 Department of Neurology, Radiology, and Biomedical Engineering, Washington University School of Medicine, St. Louis, MO, USA  
89 KU Leuven – University of Leuven, Department of Neurosciences, Experimental Neurology, Leuven, Belgium  
90 VIB Center for Brain & Disease Research, University Hospitals Leuven, Department of Neurology, Leuven, Belgium  
91 Univ.-Lille, INSERM U 1171. CHU Lille. Lille, France  
92 Department of Medical and Molecular Genetics, King's College London, London, UK  
93 SGDP Centre, Institute of Psychiatry, Psychology & Neuroscience, King's College London, London, UK  
94 Northern Institute for Cancer Research, Paul O'Gorman Building, Newcastle University, Newcastle, UK  
95 Department of Clinical Sciences Lund, Neurology, Lund University, Lund, Sweden  
96 Department of Neurology and Rehabilitation Medicine, Skåne University Hospital, Lund, Sweden  
97 Bioinformatics Core Facility, University of Gothenburg, Gothenburg, Sweden  
98 Department of Medical Epidemiology and Biostatistics, Karolinska Institutet, Stockholm, Sweden  
99 University of Technology Sydney, Faculty of Health, Ultimo, Australia  
100 Department of Medicine, University of Maryland School of Medicine, MD, USA  
101 Department of Neurology, Mayo Clinic, Jacksonville, FL, USA  
102 Geriatrics Research and Education Clinical Center, Baltimore Veterans Administration Medical Center, Baltimore, MD, USA  
103 Division of Geriatrics, School of Medicine, University of Mississippi Medical Center, Jackson, MS, USA  
104 Memory Impairment and Neurodegenerative Dementia Center, University of Mississippi Medical Center, Jackson, MS, USA  
105 Laboratory of Neurogenetics, National Institute on Aging, National Institutes of Health, Bethesda, MD, USA  
106 Data Tecnica International, Glen Echo MD, USA  
107 Department of Epidemiology and Public Health, Graduate School of Medical Sciences, Kyushu University, Fukuoka, Japan  
108 Clinical Research Facility, Department of Medicine, NUI Galway, Galway, Ireland  
109 Cardiovascular Health Research Unit, Department of Medicine, University of Washington, Seattle, WA, USA  
110 Department of Epidemiology, University of Washington, Seattle, WA  
111 Department of Health Services, University of Washington, Seattle, WA, USA  
112 Kaiser Permanente Washington Health Research Institute, Seattle, WA, USA  
113 Brain Center Rudolf Magnus, Department of Neurology, University Medical Center Utrecht, Utrecht, The Netherlands  
114 Usher Institute of Population Health Sciences and Informatics, University of Edinburgh, Edinburgh, UK  
115 Centre for Clinical Brain Sciences, University of Edinburgh, Edinburgh, UK  
116 Fred Hutchinson Cancer Research Center, University of Washington, Seattle, WA, USA  
117 Department of Medicine, Brigham and Women's Hospital, Boston, MA, USA  
118 Department of Biostatistics, University of Washington, Seattle, WA, USA  
119 Nuffield Department of Clinical Neurosciences, University of Oxford, UK  
120 Institute for Translational Genomics and Population Sciences, Los Angeles Biomedical Research Institute at Harbor-UCLA Medical Center, Torrance, CA, USA  
121 Division of Genomic Outcomes, Department of Pediatrics, Harbor-UCLA Medical Center, Torrance, CA, USA  
122 Department of Neurology, Miller School of Medicine, University of Miami, Miami, FL, USA  
123 Department of Allergy and Rheumatology, Graduate School of Medicine, the University of Tokyo, Tokyo, Japan  
124 Center for Public Health Genomics, University of Virginia, Charlottesville, VA, USA  
125 Department of Pediatrics, College of Medicine, University of Oklahoma Health Sciences Center, Oklahoma City, OK, USA  
126 Department of Neurology, Medical University of Graz, Graz, Austria  
127 University Medicine Greifswald, Institute for Community Medicine, SHIP-KEF, Greifswald, Germany  
128 University Medicine Greifswald, Department of Neurology, Greifswald, Germany  
129 Department of Neurology, Jagiellonian University, Krakow, Poland

130 Department of Neurology, Justus Liebig University, Giessen, Germany  
131 Department of Clinical Neurosciences/Neurology, Institute of Neuroscience and Physiology, Sahlgrenska Academy at University of Gothenburg, Gothenburg, Sweden  
132 Sahlgrenska University Hospital, Gothenburg, Sweden  
133 Stroke Division, Florey Institute of Neuroscience and Mental Health, University of Melbourne, Heidelberg, Australia  
134 Austin Health, Department of Neurology, Heidelberg, Australia  
135 Department of Internal Medicine, Section Gerontology and Geriatrics, Leiden University Medical Center, Leiden, the Netherlands  
136 INSERM U1219, Bordeaux, France  
137 Department of Public Health, Bordeaux University Hospital, Bordeaux, France  
138 Genetic Epidemiology Unit, Department of Epidemiology, Erasmus University Medical Center Rotterdam, Netherlands  
139 Center for Medical Systems Biology, Leiden, Netherlands  
140 School of Medicine, Dentistry and Nursing at the University of Glasgow, Glasgow, UK  
141 Department of Epidemiology and Population Health, Albert Einstein College of Medicine, NY, USA  
142 Department of Physiology and Biophysics, University of Mississippi Medical Center, Jackson, MS, USA  
143 A full list of members and affiliations appears in the Supplementary Note  
144 Department of Human Genetics, McGill University, Montreal, Canada  
145 Department of Pathophysiology, Institute of Biomedicine and Translation Medicine, University of Tartu, Tartu, Estonia  
146 Department of Cardiac Surgery, Tartu University Hospital, Tartu, Estonia  
147 Clinical Gene Networks AB, Stockholm, Sweden  
148 Department of Genetics and Genomic Sciences, The Icahn Institute for Genomics and Multiscale Biology Icahn School of Medicine at Mount Sinai, New York, NY, USA  
149 Department of Pathophysiology, Institute of Biomedicine and Translation Medicine, University of Tartu, Biomedikum, Tartu, Estonia  
150 Integrated Cardio Metabolic Centre, Department of Medicine, Karolinska Institutet, Karolinska Universitetssjukhuset, Huddinge, Sweden.  
151 Clinical Gene Networks AB, Stockholm, Sweden  
152 Sorbonne Universités, UPMC Univ. Paris 06, INSERM, UMR\_S 1166, Team Genomics & Pathophysiology of Cardiovascular Diseases, Paris, France  
153 ICAN Institute for Cardiometabolism and Nutrition, Paris, France  
154 Department of Biomedical Engineering, University of Virginia, Charlottesville, VA, USA  
155 Group Health Research Institute, Group Health Cooperative, Seattle, WA, USA  
156 Seattle Epidemiologic Research and Information Center, VA Office of Research and Development, Seattle, WA, USA  
157 Cardiovascular Research Center, Massachusetts General Hospital, Boston, MA, USA  
158 Department of Medical Research, Bærum Hospital, Vestre Viken Hospital Trust, Gjøttum, Norway  
159 Saw Swee Hock School of Public Health, National University of Singapore and National University Health System, Singapore  
160 National Heart and Lung Institute, Imperial College London, London, UK  
161 Department of Gene Diagnostics and Therapeutics, Research Institute, National Center for Global Health and Medicine, Tokyo, Japan  
162 Department of Epidemiology, Tulane University School of Public Health and Tropical Medicine, New Orleans, LA, USA  
163 Department of Cardiology, University Medical Center Groningen, University of Groningen, Netherlands  
164 MRC-PHE Centre for Environment and Health, School of Public Health, Department of Epidemiology and Biostatistics, Imperial College London, London, UK  
165 Department of Epidemiology and Biostatistics, Imperial College London, London, UK  
166 Department of Cardiology, Ealing Hospital NHS Trust, Southall, UK  
167 National Heart, Lung and Blood Research Institute, Division of Intramural Research, Population Sciences Branch, Framingham, MA, USA  
168 A full list of members and affiliations appears at the end of the manuscript  
169 Department of Pharmaceutical Sciences, College of Pharmacy, University of Oklahoma Health Sciences Center, Oklahoma City, OK, USA  
170 Oklahoma Center for Neuroscience, Oklahoma City, OK, USA  
171 Department of Pathology and Genetics, Institute of Biomedicine, The Sahlgrenska Academy at University of Gothenburg, Gothenburg, Sweden  
172 Department of Neurology, Helsinki University Hospital, Helsinki, Finland  
173 Clinical Neurosciences, Neurology, University of Helsinki, Helsinki, Finland  
174 Department of Neurology, University of Washington, Seattle, WA, USA  
175 Albrecht Kossel Institute, University Clinic of Rostock, Rostock, Germany  
176 Clinical Trial Service Unit and Epidemiological Studies Unit, Nuffield Department of Population Health, University of Oxford, Oxford, UK  
177 Department of Genetics, Perelman School of Medicine, University of Pennsylvania, PA, USA  
178 Faculty of Medicine, University of Iceland, Reykjavik, Iceland  
179 Departments of Neurology and Public Health Sciences, University of Virginia School of Medicine, Charlottesville, VA, USA  
180 Department of Neurology, Boston University School of Medicine, Boston, MA, USA  
181 Human Genetics Center, University of Texas Health Science Center at Houston, Houston, TX, USA  
182 Center for Genomic Medicine, Kyoto University Graduate School of Medicine, Kyoto, Japan  
183 Munich Cluster for Systems Neurology (SyNergy), Munich, Germany  
184 German Center for Neurodegenerative Diseases (DZNE), Munich, Germany  
185 Boston University School of Medicine, Boston, MA, USA  
186 University of Kentucky College of Public Health, Lexington, KY, USA  
187 University of Newcastle and Hunter Medical Research Institute, New Lambton, Australia  
188 Univ. Montpellier, Inserm, U1061, Montpellier, France  
189 Centre for Research in Environmental Epidemiology, Barcelona, Spain  
190 Department of Neurology, Università degli Studi di Perugia, Umbria, Italy  
191 Department of Medicine, University of Maryland School of Medicine, Baltimore, MD, USA  
192 Broad Institute, Cambridge, MA, USA  
193 Univ. Bordeaux, Inserm, Bordeaux Population Health Research Center, UMR 1219, Bordeaux, France  
194 Bordeaux University Hospital, Department of Neurology, Memory Clinic, Bordeaux, France  
195 Neurovascular Research Laboratory. Vall d'Hebron Institut of Research, Neurology and Medicine Departments-Universitat Autònoma de Barcelona. Vall d'Hebrón Hospital, Barcelona, Spain  
196 University Medicine Greifswald, Department of Internal Medicine B, Greifswald, Germany  
197 DZHK, Greifswald, Germany  
198 Robertson Center for Biostatistics, University of Glasgow, Glasgow, UK  
199 Hero DMC Heart Institute, Dayanand Medical College & Hospital, Ludhiana, India  
200 Atherosclerosis Research Unit, Department of Medicine Solna, Karolinska Institutet, Stockholm, Sweden  
201 Karolinska Institutet, Stockholm, Sweden  
202 Division of Emergency Medicine, and Department of Neurology, Washington University School of Medicine, St. Louis, MO, USA  
203 Tohoku Medical Megabank Organization, Sendai, Japan  
204 Department of Psychiatry, Washington University School of Medicine, St. Louis, MO, USA  
205 Department of Public Health and Caring Sciences / Geriatrics, Uppsala University, Uppsala, Sweden  
206 Epidemiology and Prevention Group, Center for Public Health Sciences, National Cancer Center, Tokyo, Japan

207 Department of Internal Medicine and the Center for Clinical and Translational Science, The Ohio State University, Columbus, OH, USA  
208 Institute of Neuroscience and Physiology, the Sahlgrenska Academy at University of Gothenburg, Goteborg, Sweden  
209 Department of Basic and Clinical Neurosciences, King's College London, London, UK  
210 Department of Health Care Administration and Management, Graduate School of Medical Sciences, Kyushu University, Japan  
211 Department of Medicine and Clinical Science, Graduate School of Medical Sciences, Kyushu University, Japan  
212 Landspítali National University Hospital, Departments of Neurology & Radiology, Reykjavik, Iceland  
213 Department of Neurology, Heidelberg University Hospital, Germany  
214 Department of Neurology, Erasmus University Medical Center  
215 Hospital Universitari Mutua Terrassa, Terrassa (Barcelona), Spain  
216 Albert Einstein College of Medicine, Montefiore Medical Center, New York, NY, USA  
217 John Hunter Hospital, Hunter Medical Research Institute and University of Newcastle, Newcastle, NSW, Australia  
218 Centre for Prevention of Stroke and Dementia, Nuffield Department of Clinical Neurosciences, University of Oxford, UK  
219 Department of Medical Sciences, Uppsala University, Uppsala, Sweden  
220 Genetic and Genomic Epidemiology Unit, Wellcome Trust Centre for Human Genetics, University of Oxford, Oxford, UK  
221 The Wellcome Trust Centre for Human Genetics, Oxford, UK  
222 Beth Israel Deaconess Medical Center, Boston, MA, USA  
223 Wake Forest School of Medicine, Wake Forest, NC, USA  
224 Department of Neurology, University of Pittsburgh, Pittsburgh, PA, USA  
225 BioBank Japan, Laboratory of Clinical Sequencing, Department of Computational biology and medical Sciences, Graduate school of Frontier Sciences, The University of Tokyo, Tokyo, Japan  
226 Neurovascular Research Laboratory, Vall d'Hebron Institut of Research, Neurology and Medicine Departments-Universitat Autònoma de Barcelona. Vall d'Hebrón Hospital, Barcelona, Spain  
227 Department of Biostatistics, University of Liverpool, Liverpool, UK  
228 Wellcome Trust Centre for Human Genetics, University of Oxford, Oxford, UK  
229 Institute of Genetic Epidemiology, Helmholtz Zentrum München - German Research Center for Environmental Health, Neuherberg, Germany  
230 Department of Medicine I, Ludwig-Maximilians-Universität, Munich, Germany  
231 DZHK (German Centre for Cardiovascular Research), partner site Munich Heart Alliance, Munich, Germany  
232 Department of Cerebrovascular Diseases, Fondazione IRCCS Istituto Neurologico "Carlo Besta", Milano, Italy  
233 Karolinska Institutet, MEB, Stockholm, Sweden  
234 University of Tartu, Estonian Genome Center, Tartu, Estonia, Tartu, Estonia  
235 Department of Clinical and Experimental Sciences, Neurology Clinic, University of Brescia, Italy  
236 Translational Genomics Unit, Department of Oncology, IRCCS Istituto di Ricerche Farmacologiche Mario Negri, Milano, Italy  
237 Department of Genetics, Microbiology and Statistics, University of Barcelona, Barcelona, Spain  
238 Psychiatric Genetics Unit, Group of Psychiatry, Mental Health and Addictions, Vall d'Hebron Research Institute (VHIR), Universitat Autònoma de Barcelona, Biomedical Network Research Centre on Mental Health (CIBERSAM), Barcelona, Spain  
239 Department of Neurology, IMIM-Hospital del Mar, and Universitat Autònoma de Barcelona, Spain  
240 IMIM (Hospital del Mar Medical Research Institute), Barcelona, Spain  
241 National Institute for Health Research Comprehensive Biomedical Research Centre, Guy's & St. Thomas' NHS Foundation Trust and King's College London, London, UK  
242 Division of Health and Social Care Research, King's College London, London, UK  
243 FIMM-Institute for Molecular Medicine Finland, Helsinki, Finland  
244 THL-National Institute for Health and Welfare, Helsinki, Finland  
245 Iwate Tohoku Medical Megabank Organization, Iwate Medical University, Iwate, Japan  
246 BHF Glasgow Cardiovascular Research Centre, Faculty of Medicine, Glasgow, UK  
247 deCODE Genetics/Amgen, Inc., Reykjavik, Iceland  
248 Icelandic Heart Association, Reykjavik, Iceland  
249 Institute of Biomedicine, the Sahlgrenska Academy at University of Gothenburg, Goteborg, Sweden  
250 Department of Epidemiology, University of Maryland School of Medicine, Baltimore, MD, USA  
251 Institute of Cardiovascular and Medical Sciences, Faculty of Medicine, University of Glasgow, Glasgow, UK  
252 Chair of Genetic Epidemiology, IBE, Faculty of Medicine, LMU Munich, Germany  
253 Division of Epidemiology and Prevention, Aichi Cancer Center Research Institute, Nagoya, Japan  
254 Department of Epidemiology, Nagoya University Graduate School of Medicine, Nagoya, Japan  
255 University Medicine Greifswald, Institute for Community Medicine, SHIP-KEF, Greifswald, Germany  
256 Department of Neurology, Caen University Hospital, Caen, France  
257 University of Caen Normandy, Caen, France  
258 Department of Internal Medicine, Erasmus University Medical Center, Rotterdam, Netherlands  
259 Landspítali University Hospital, Reykjavik, Iceland  
260 Survey Research Center, University of Michigan, Ann Arbor, MI, USA  
261 University of Virginia Department of Neurology, Charlottesville, VA, USA

**Supplementary Figure 1: Workflow of the project**

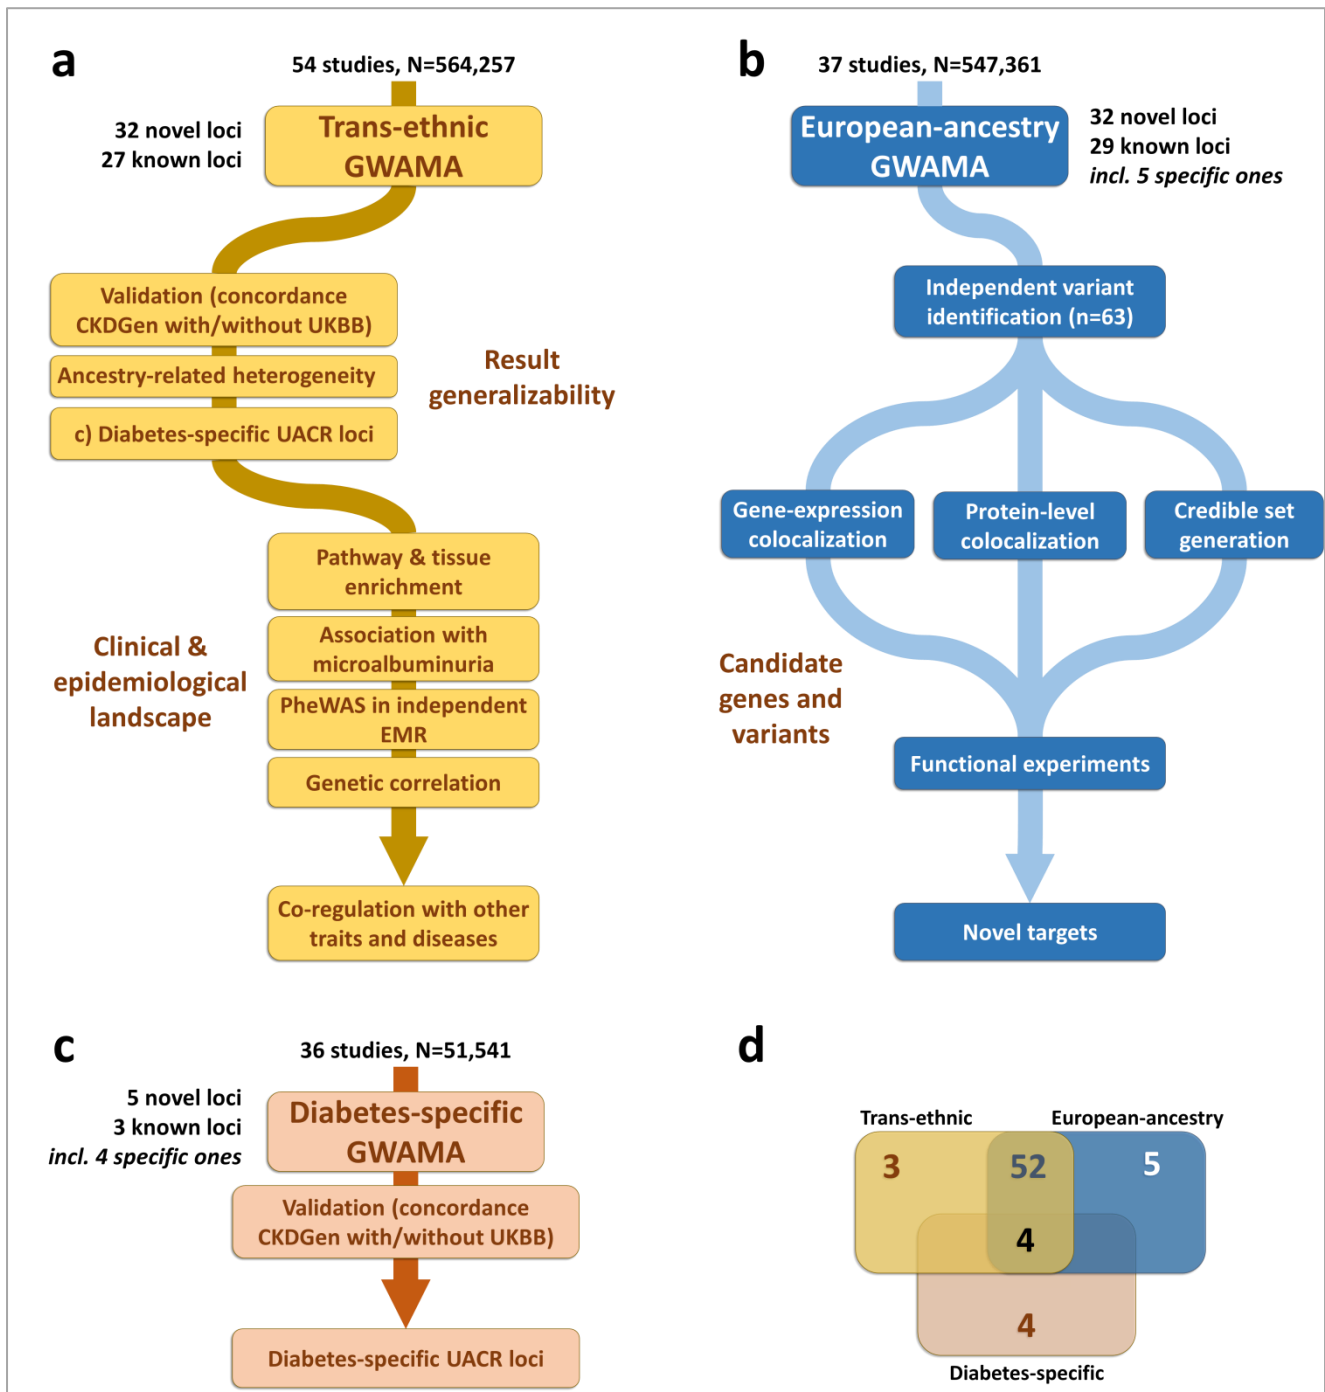

Overview of the analysis workflow for trans-ethnic (a), European ancestry-specific (b), and diabetes-specific (c) genome-wide association meta-analyses (GWAMA). The Venn diagram in panel (d) shows the number of overlapping loci between the different GWAMA.

**Supplementary Figure 2: Regional association plots for loci identified in trans-ethnic GWAS meta-analysis of UACR**

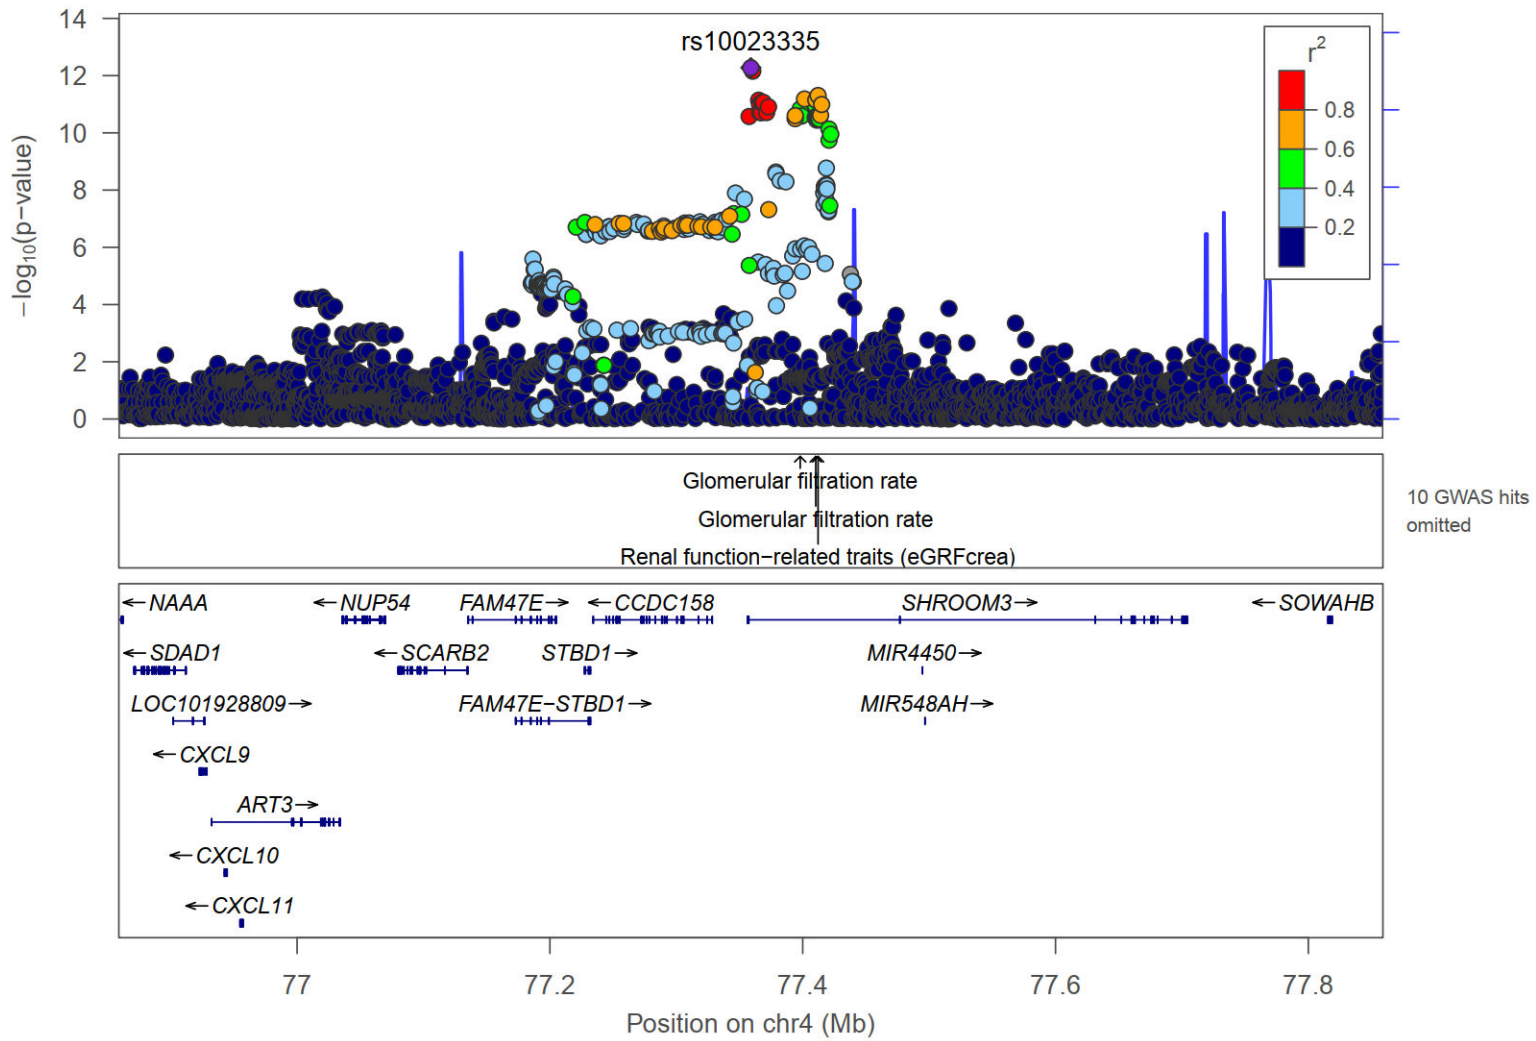

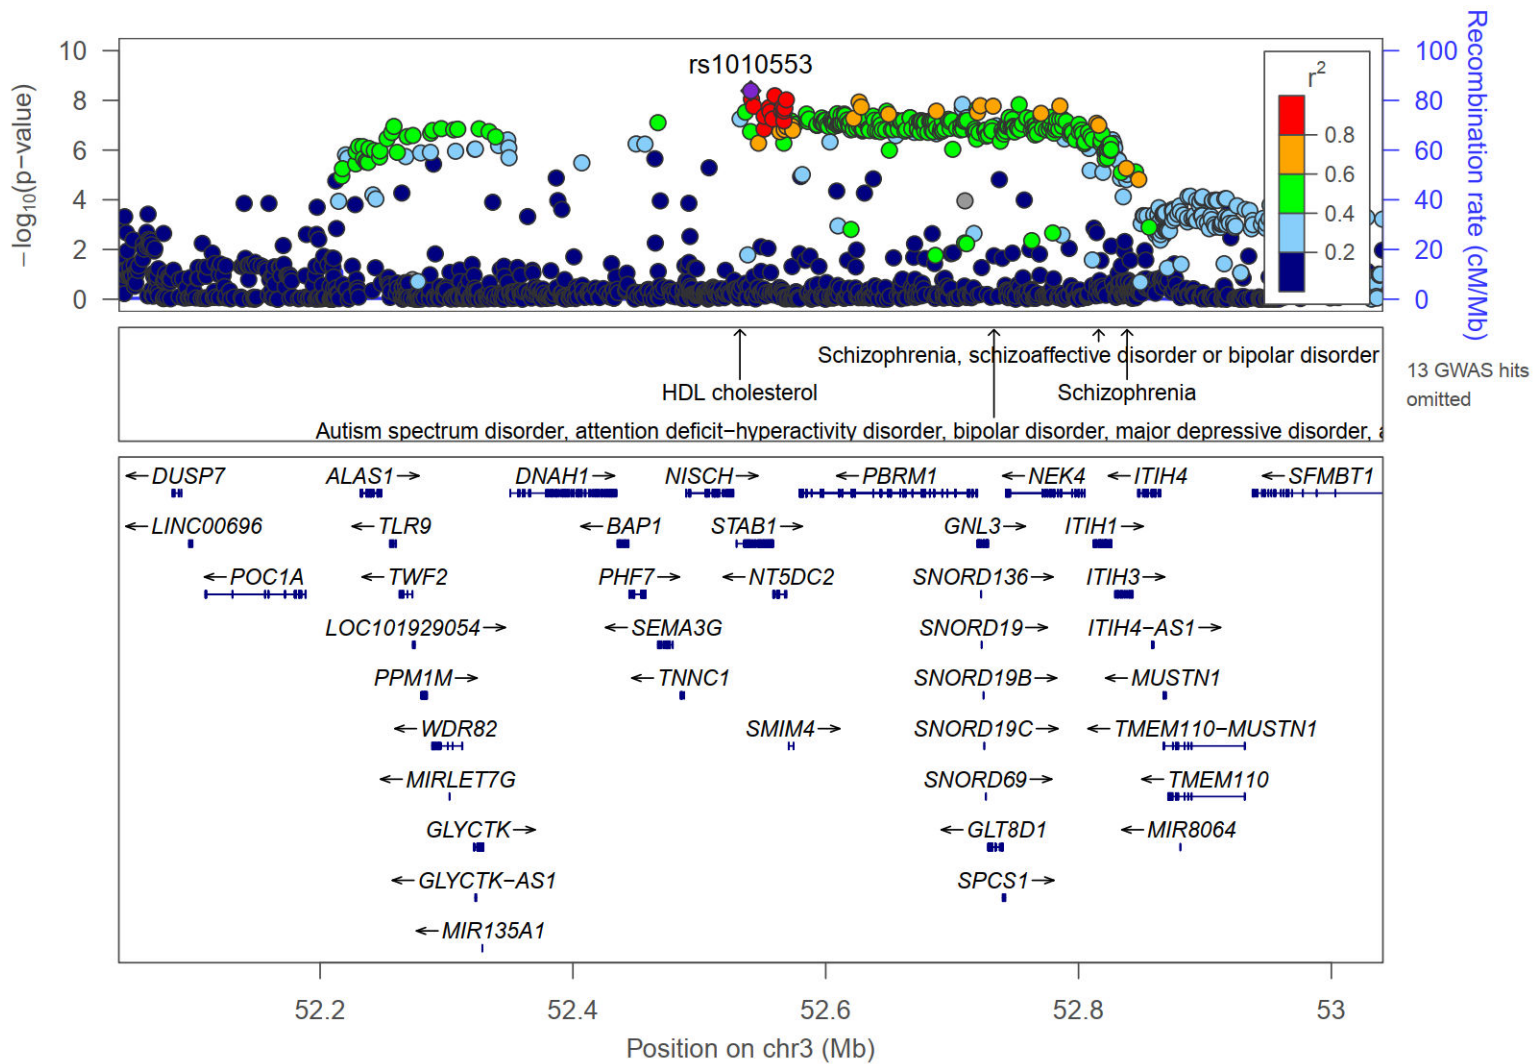

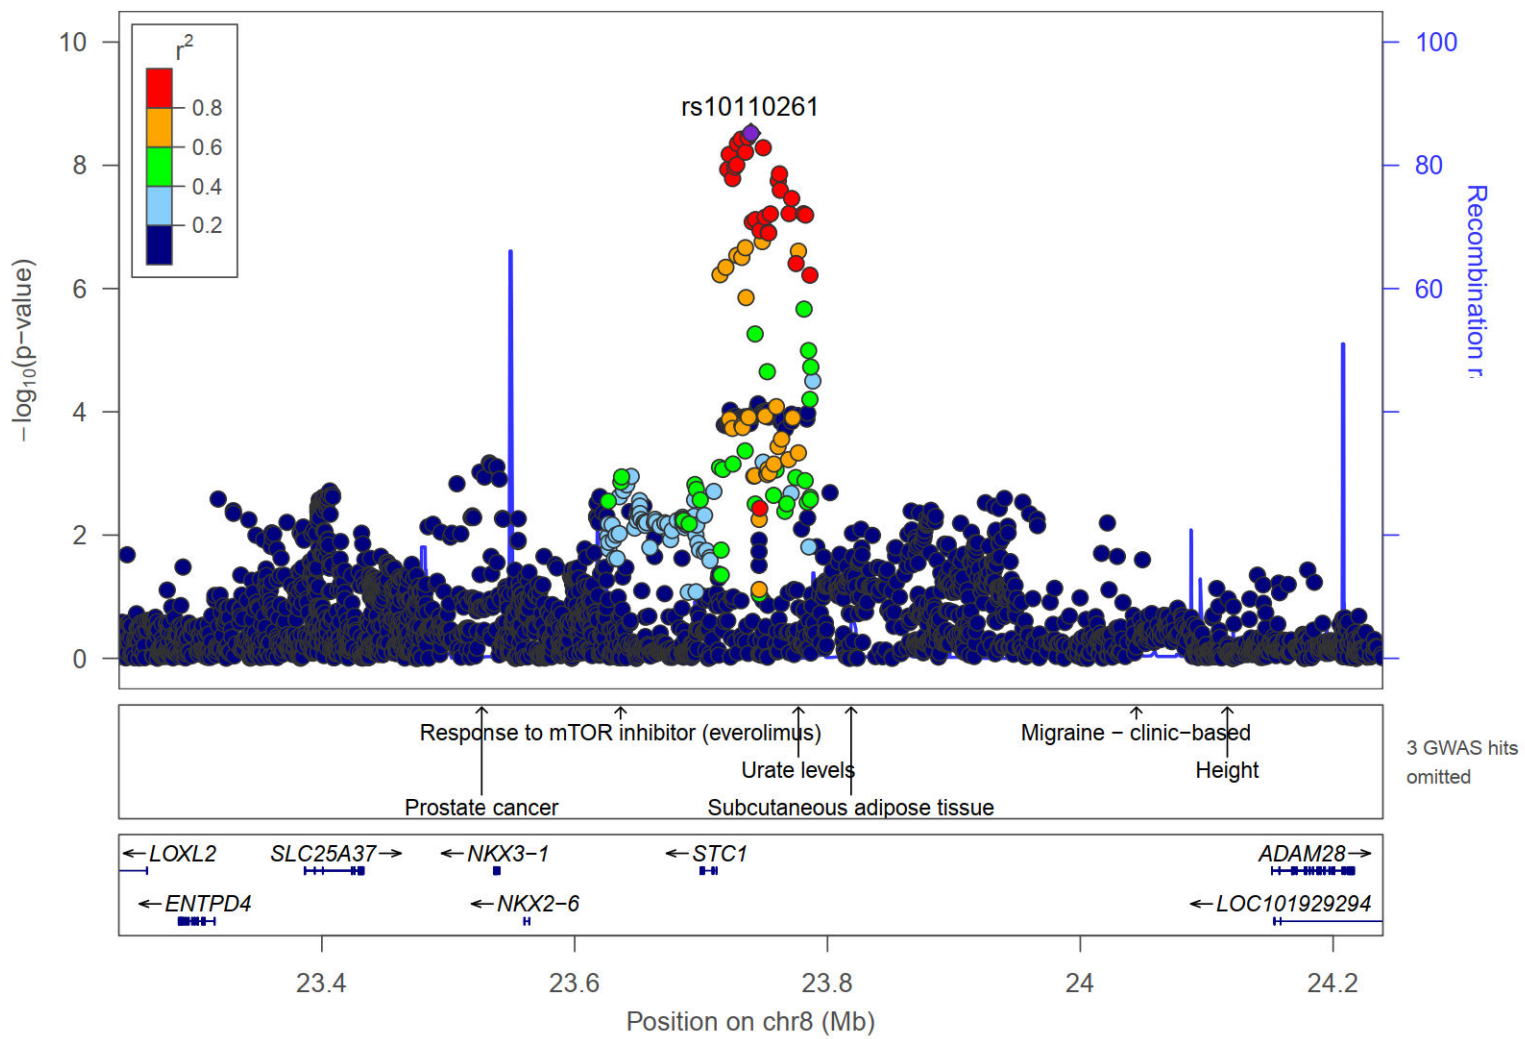



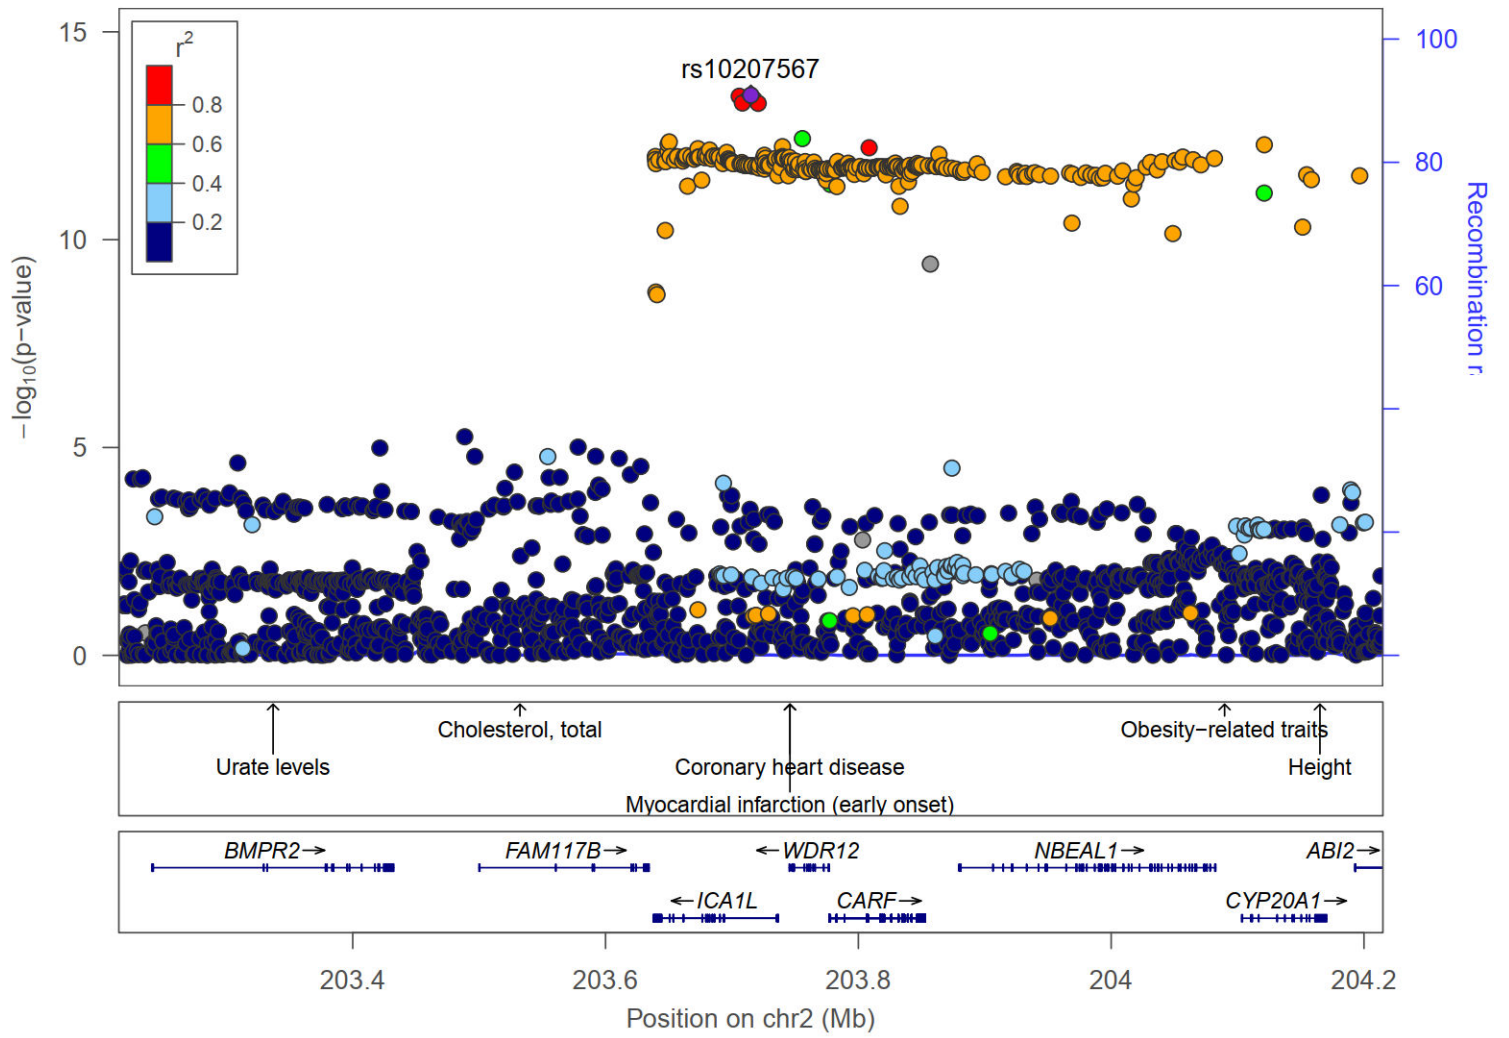



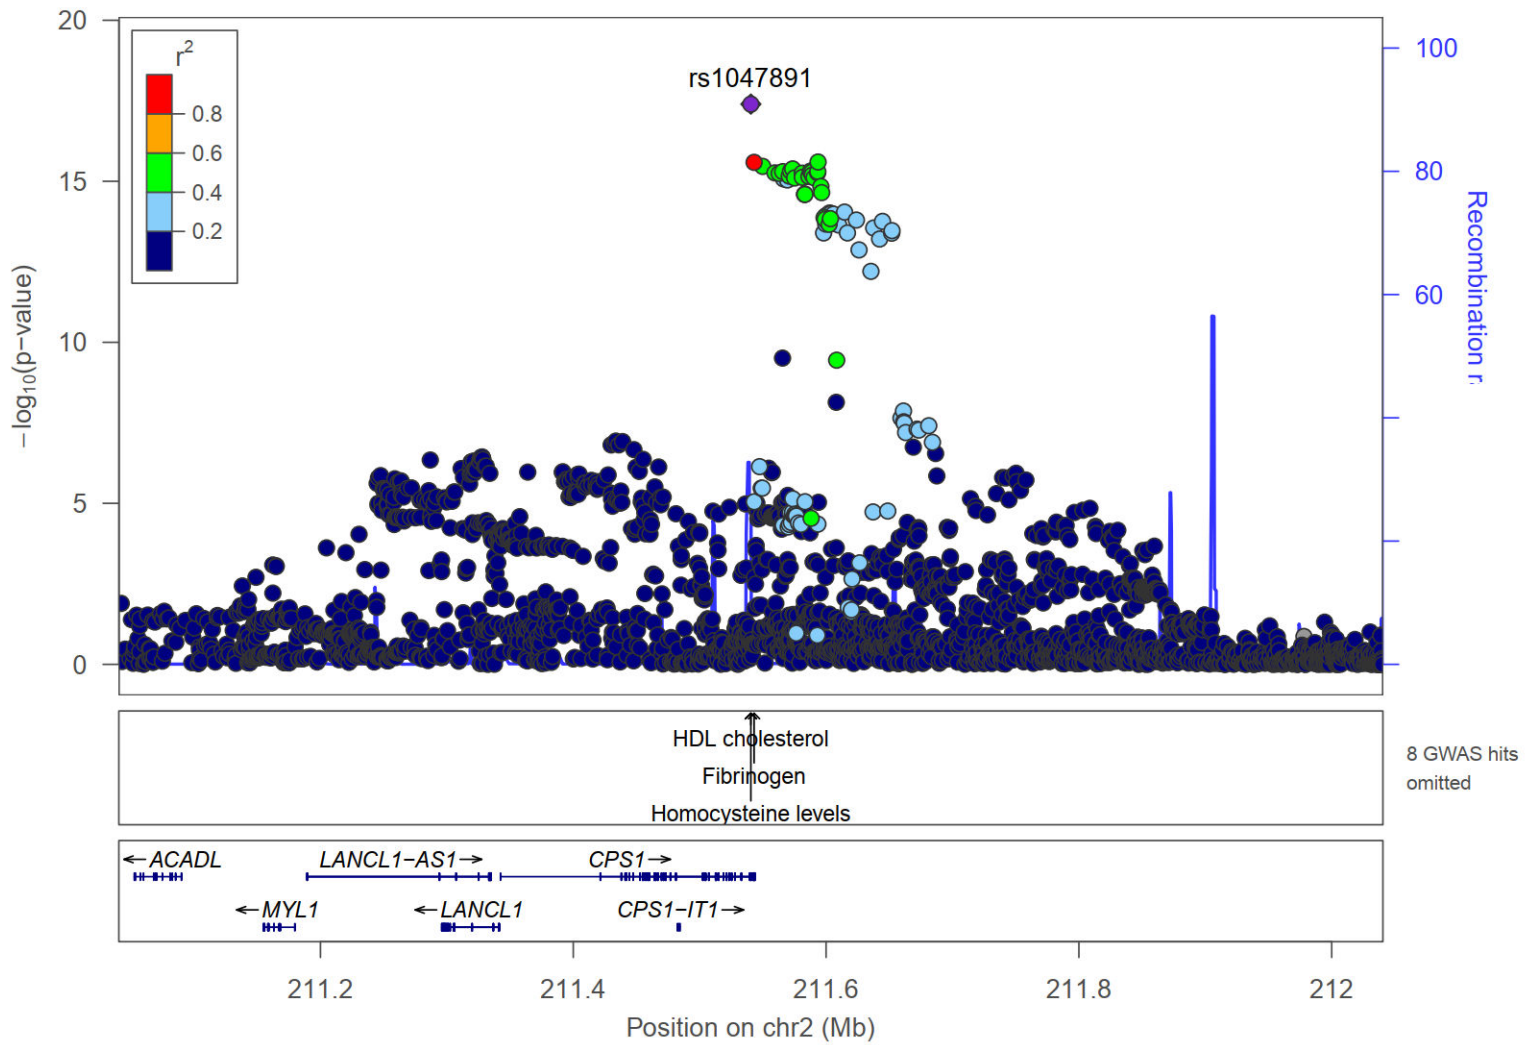

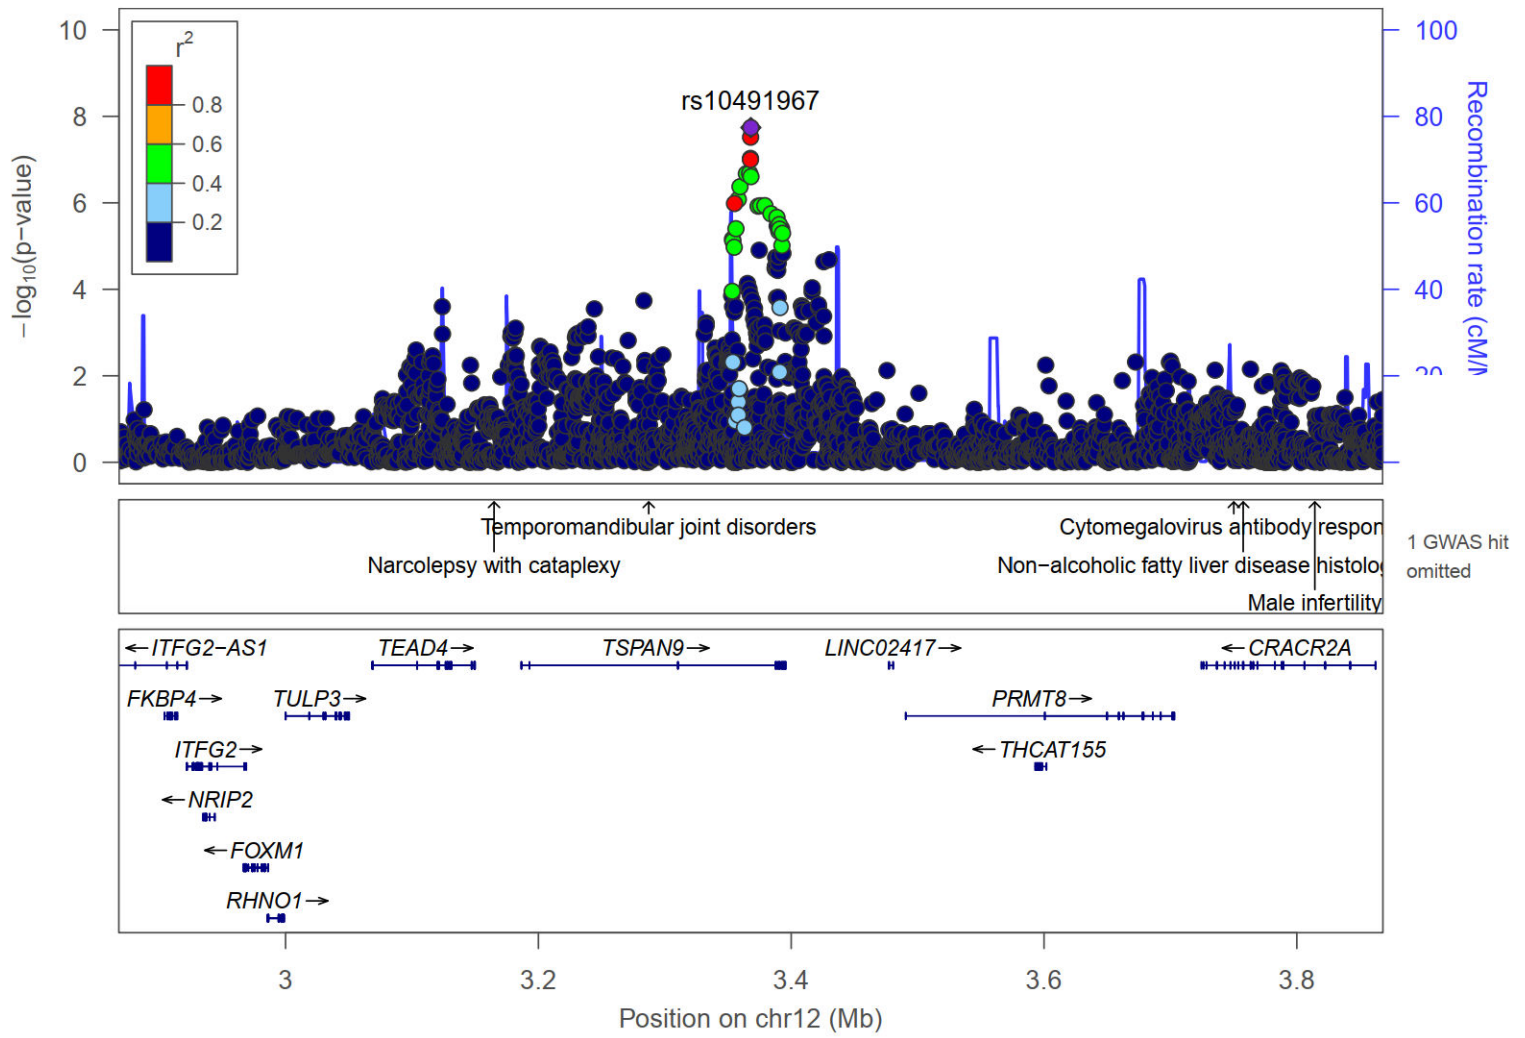

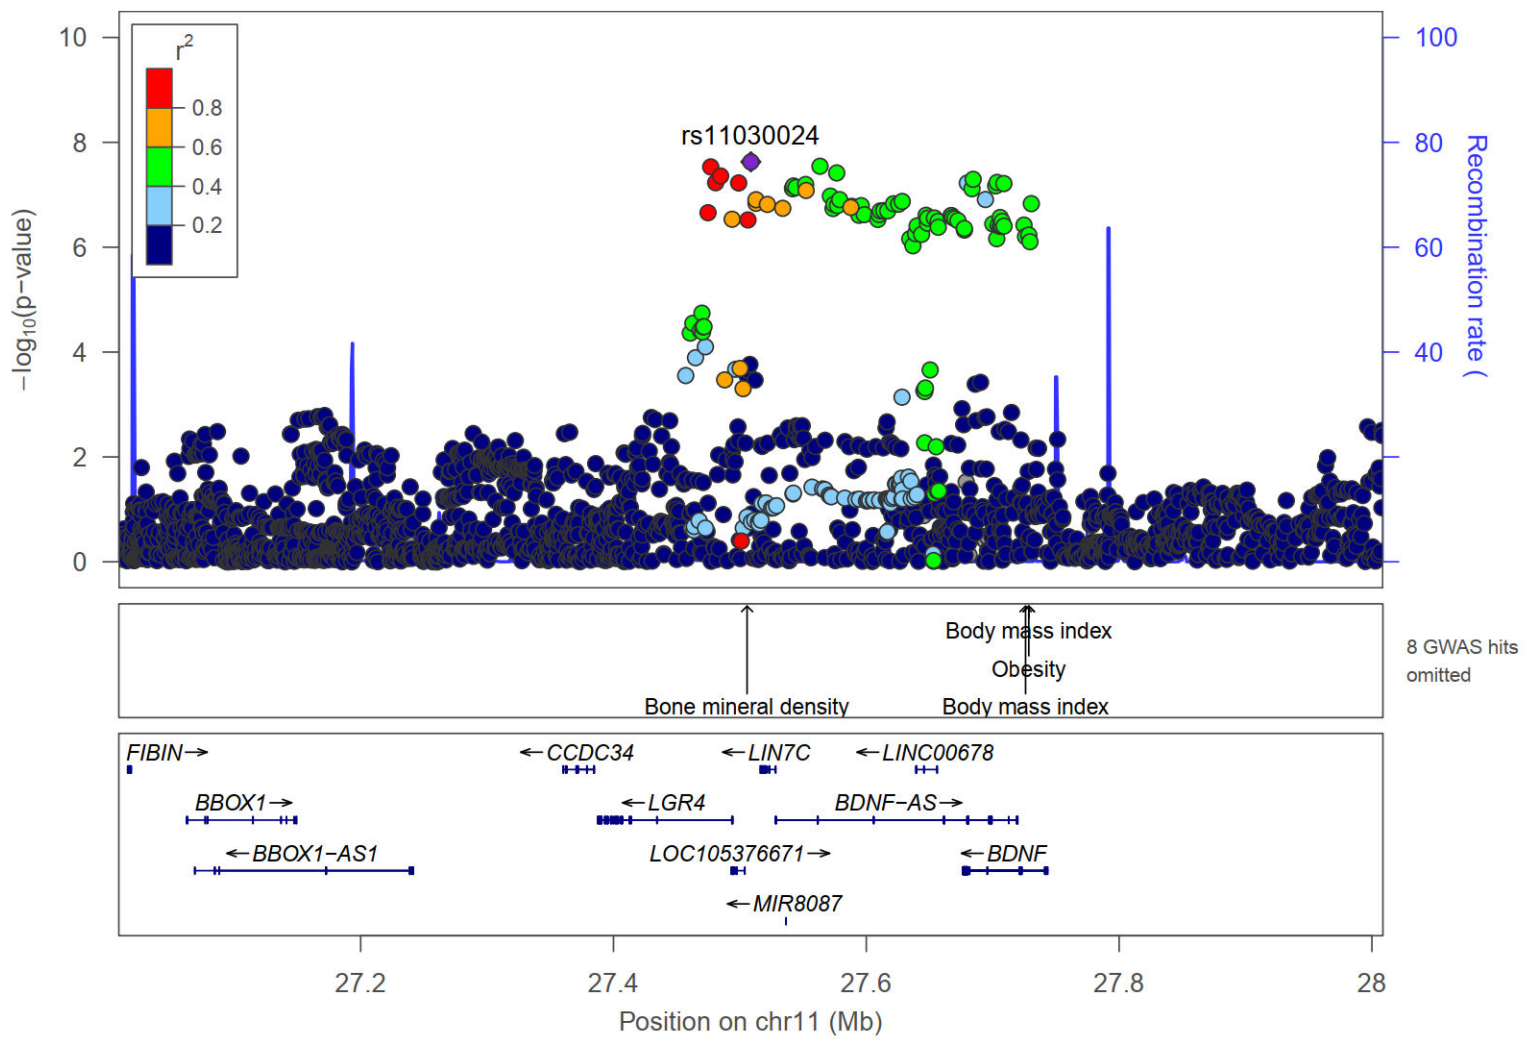

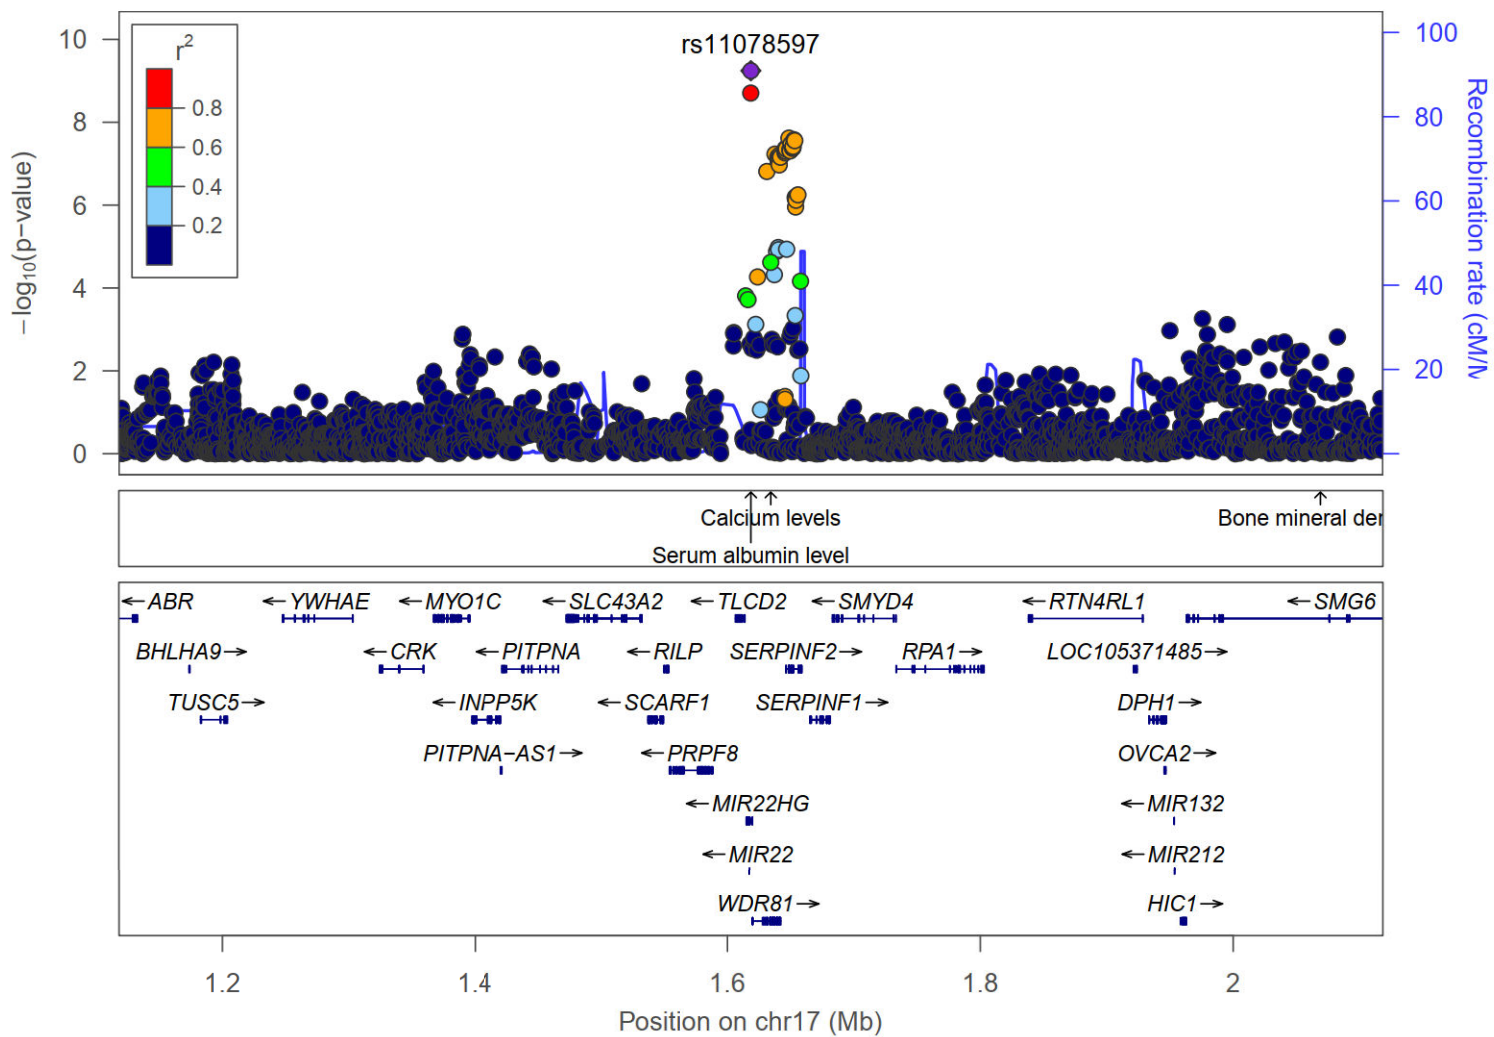

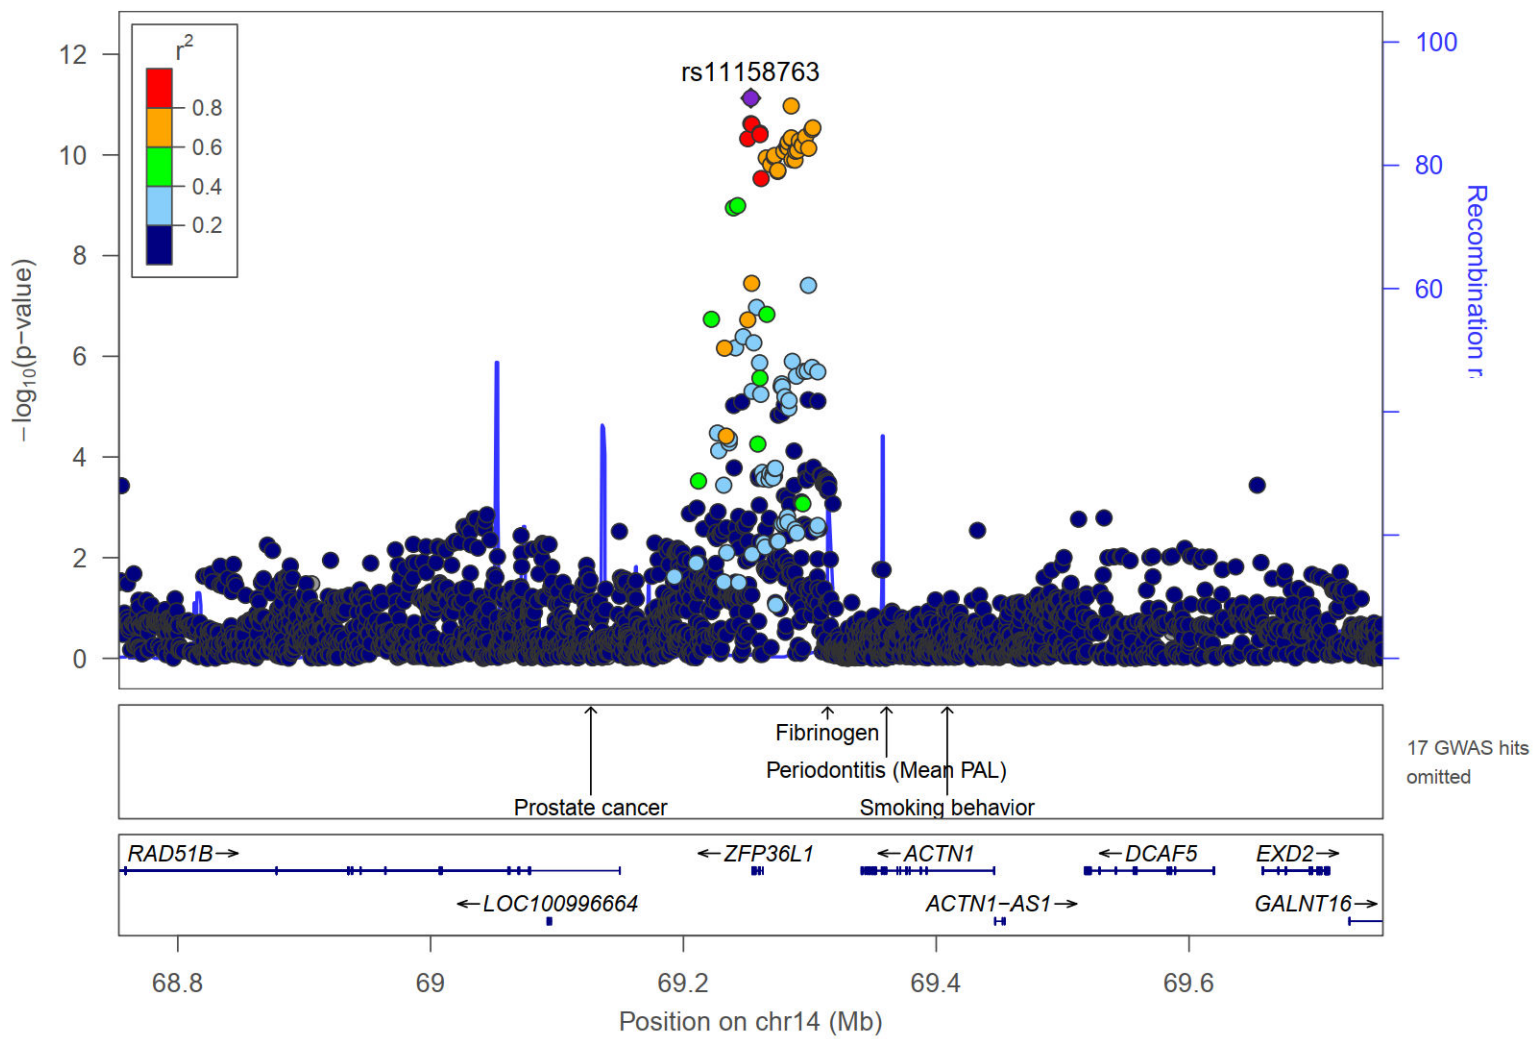

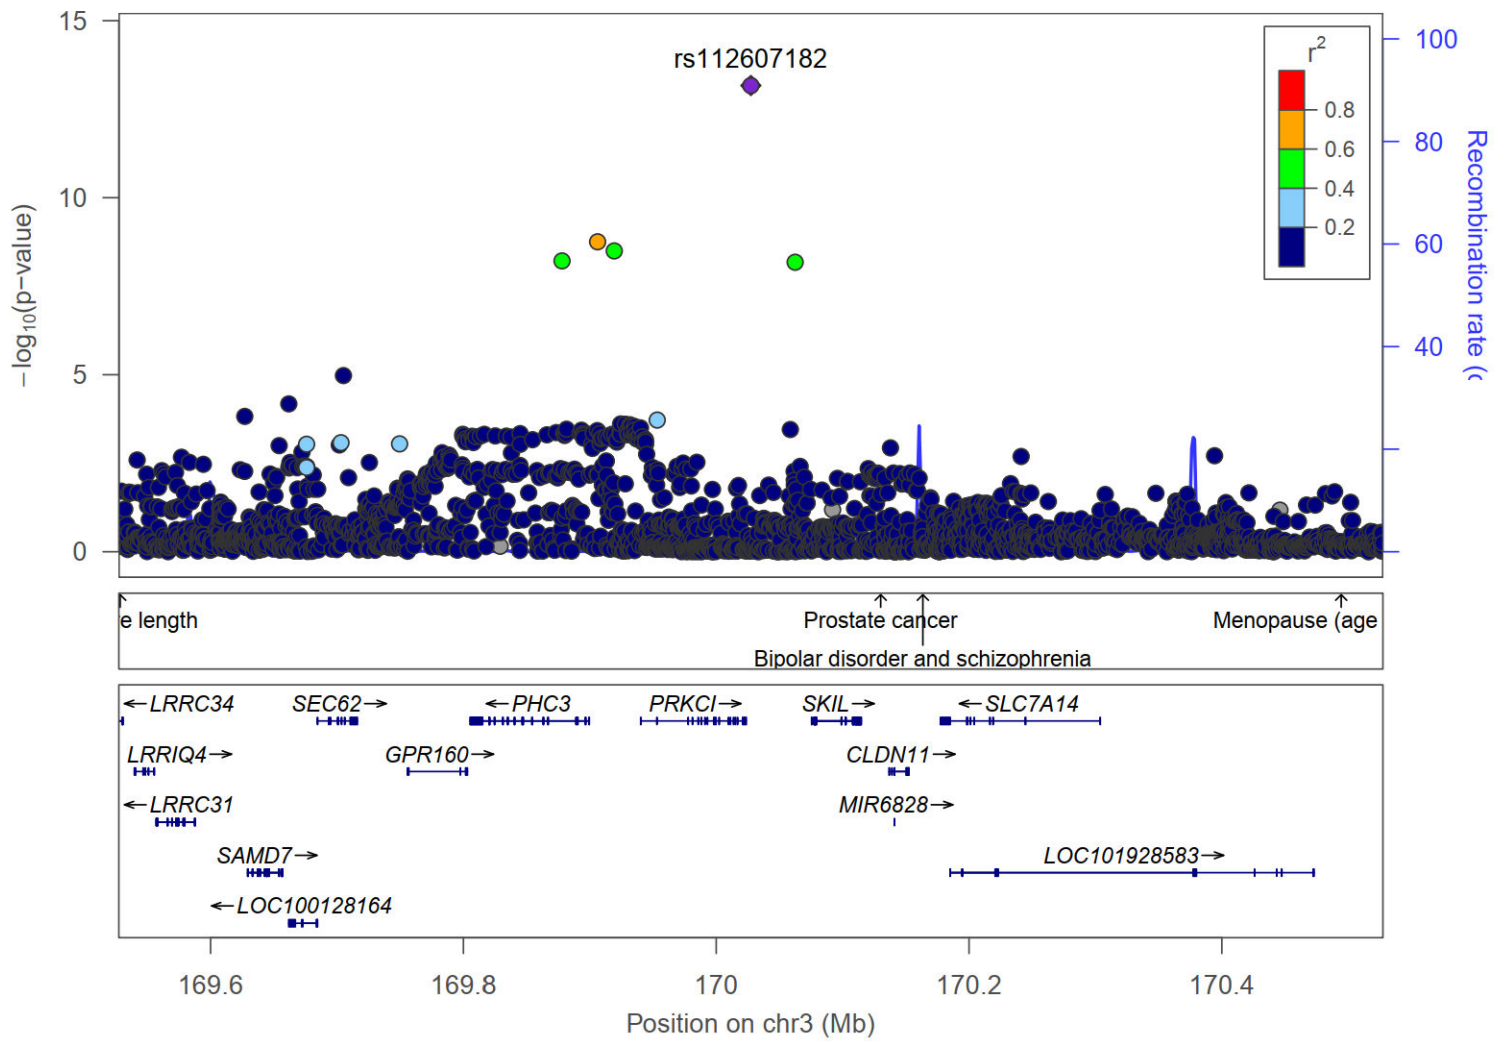



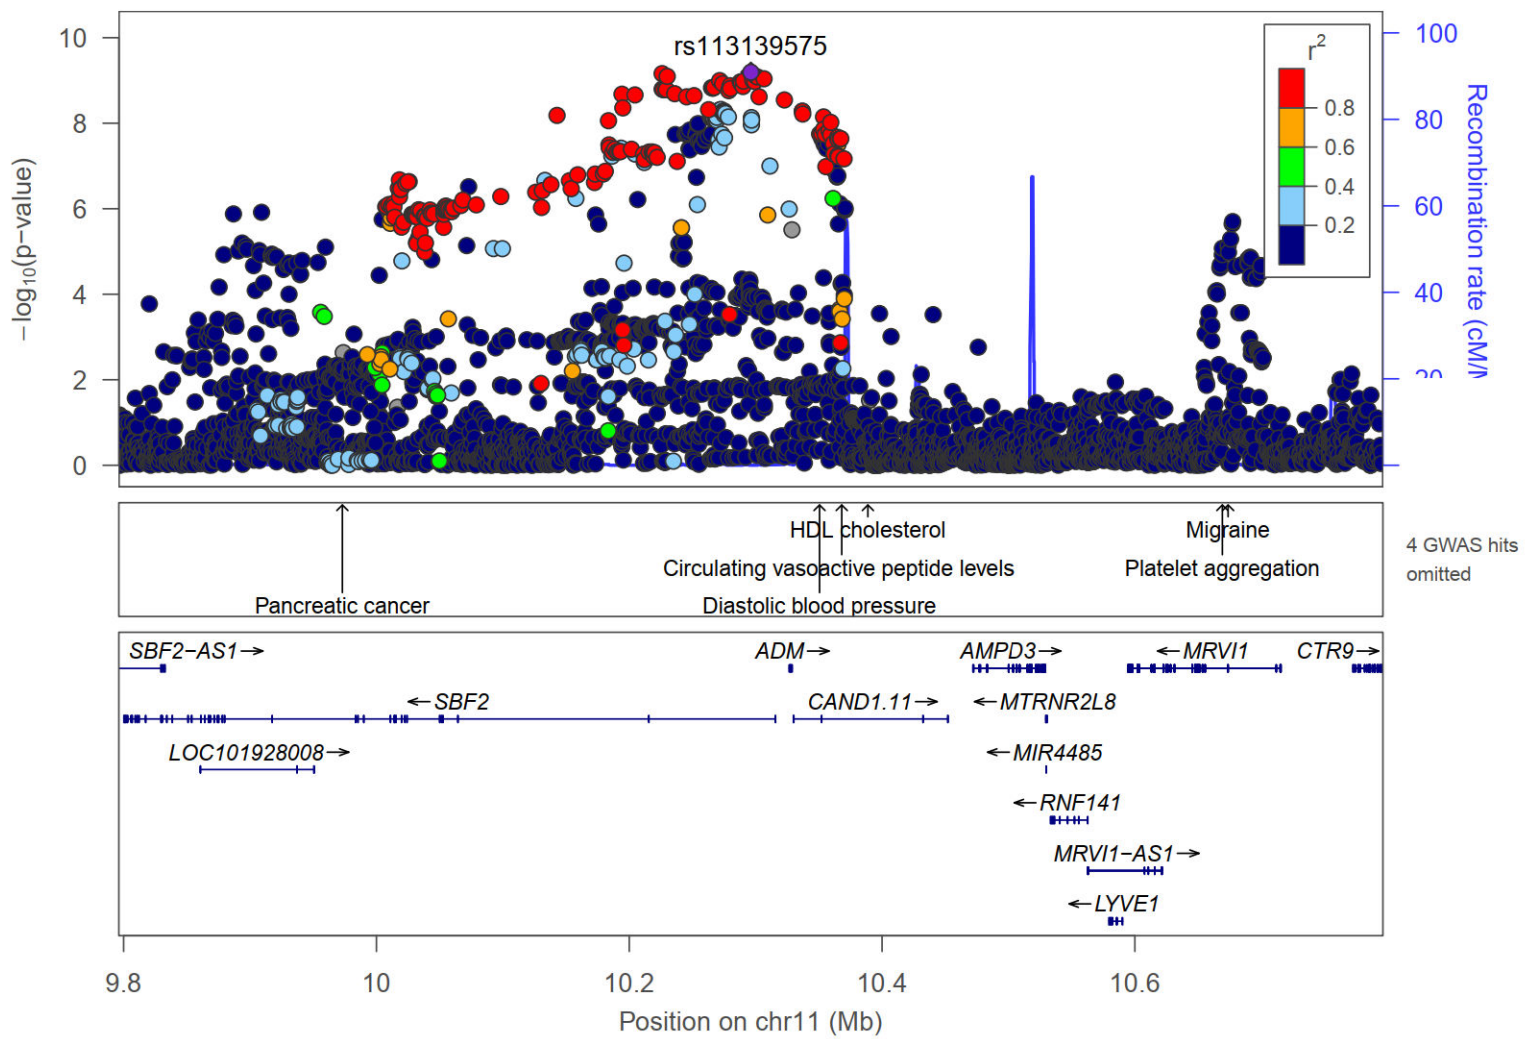

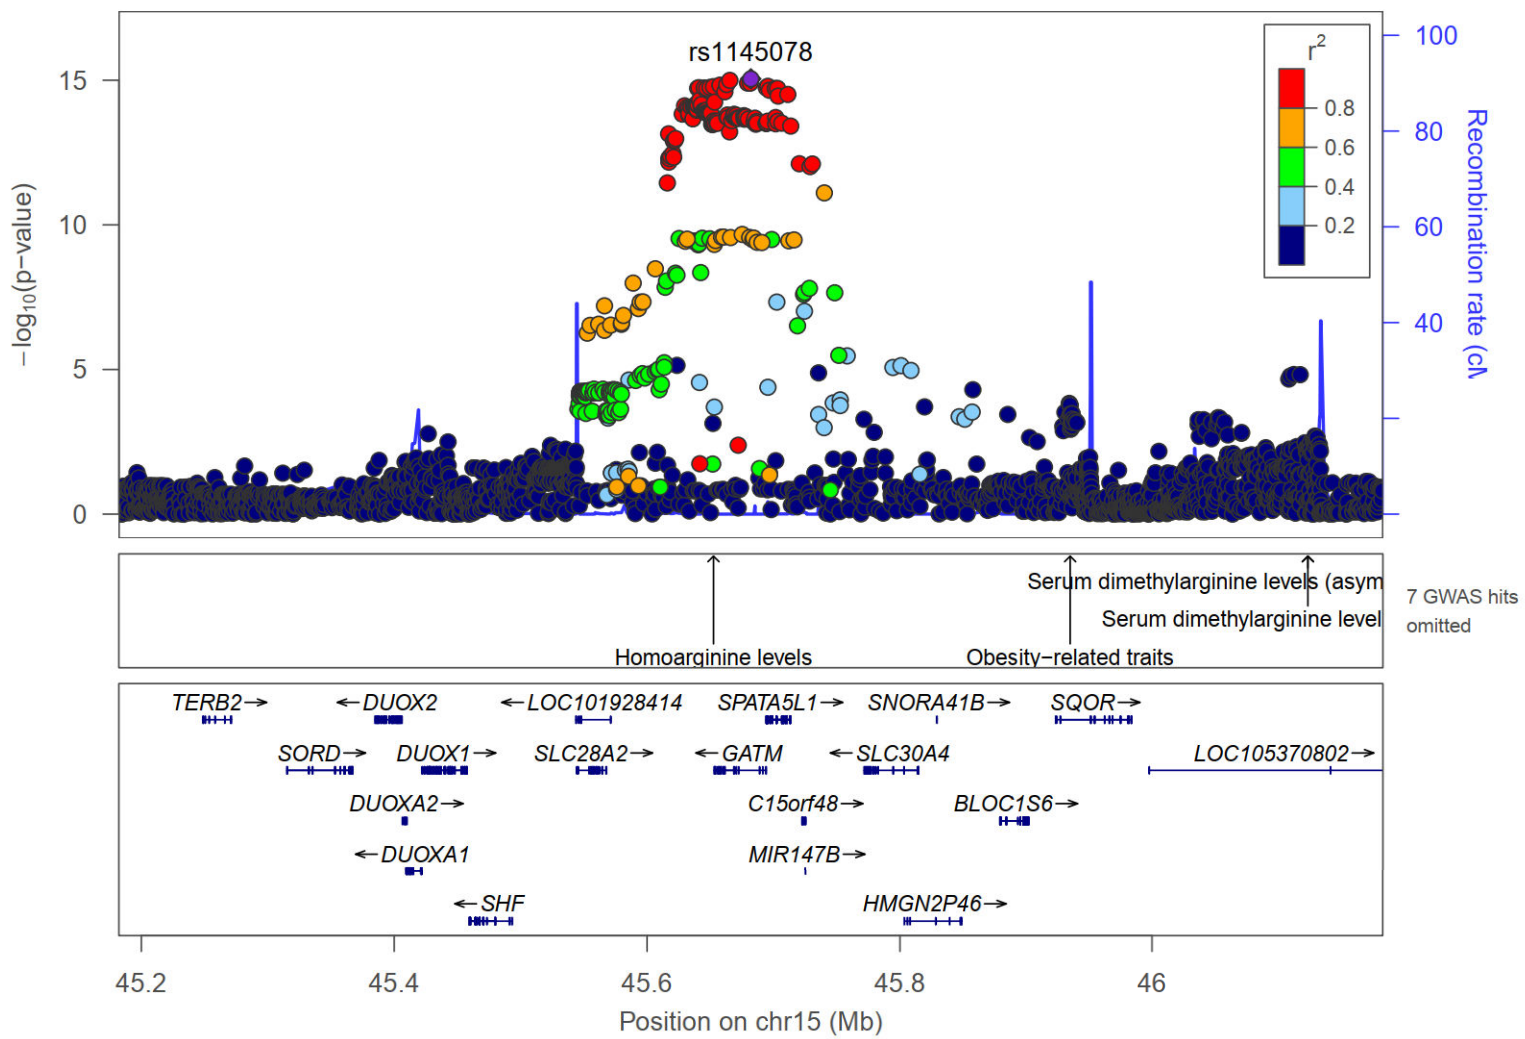



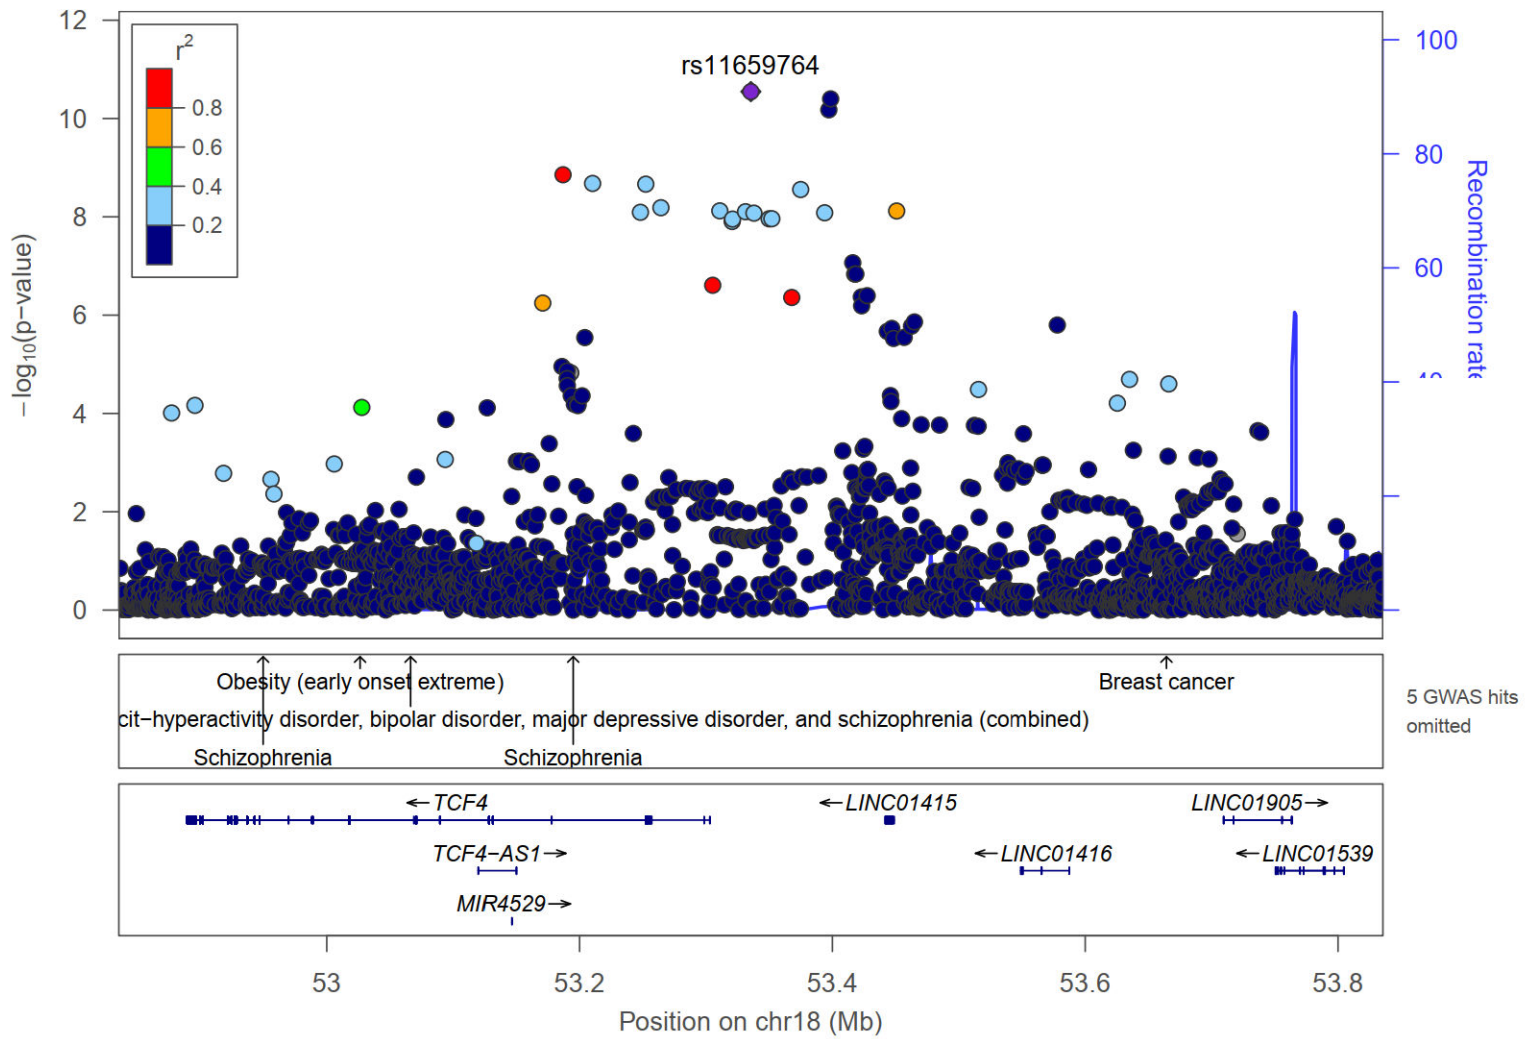

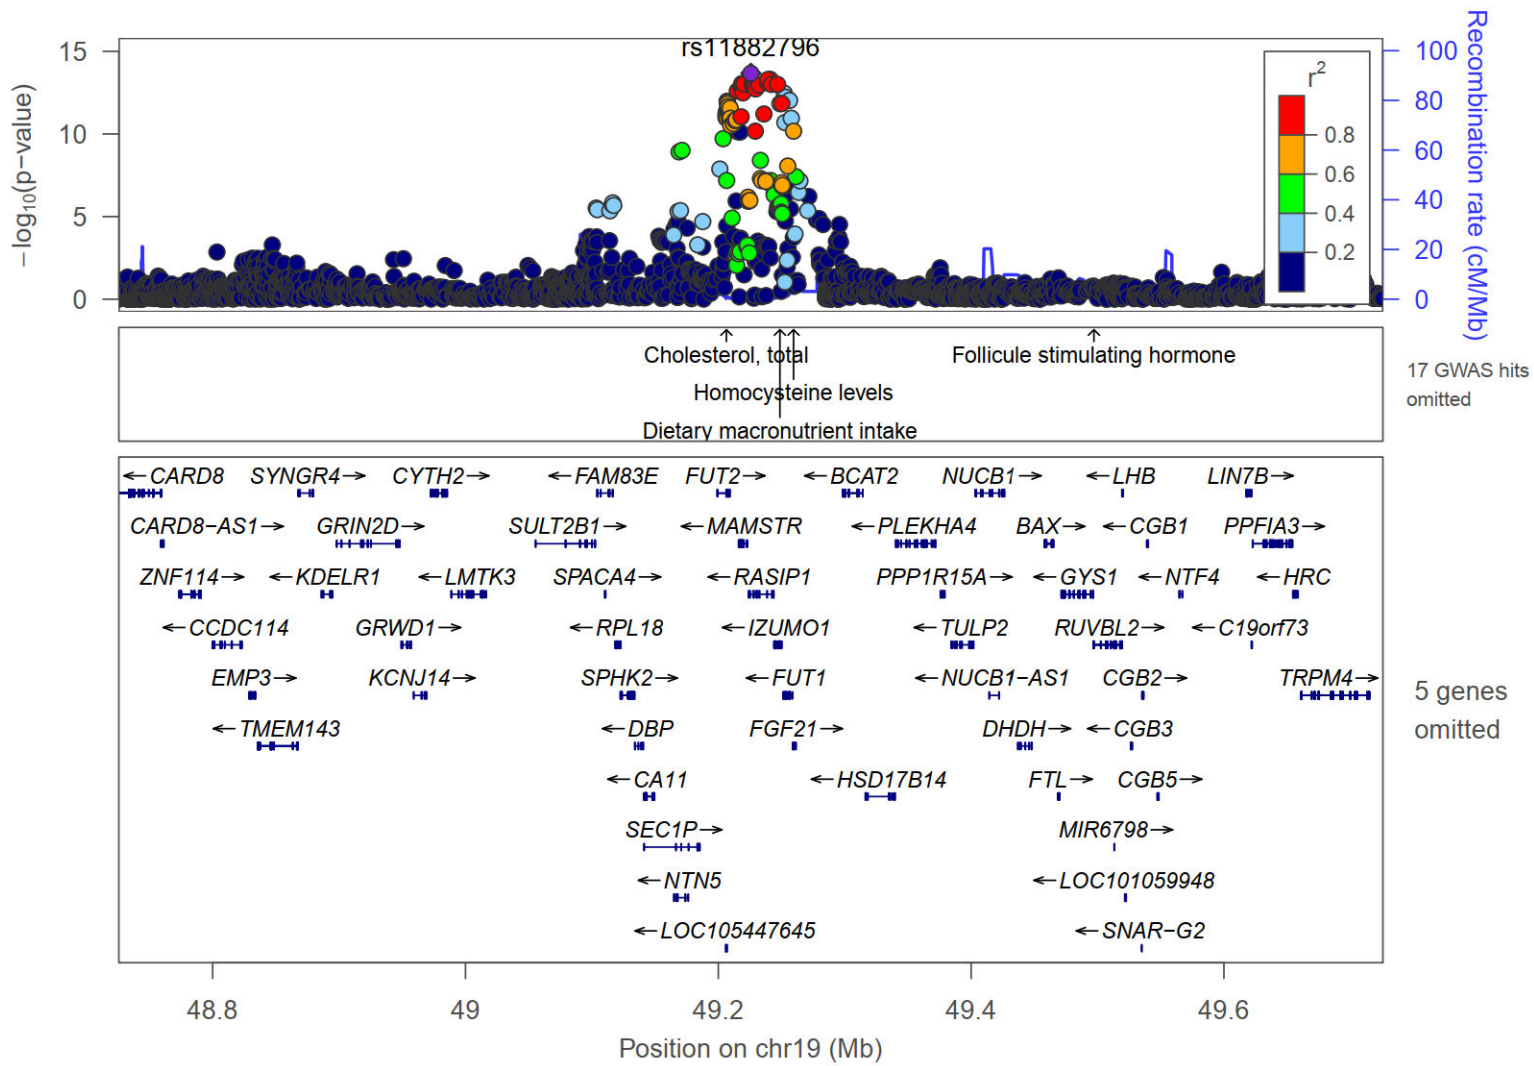

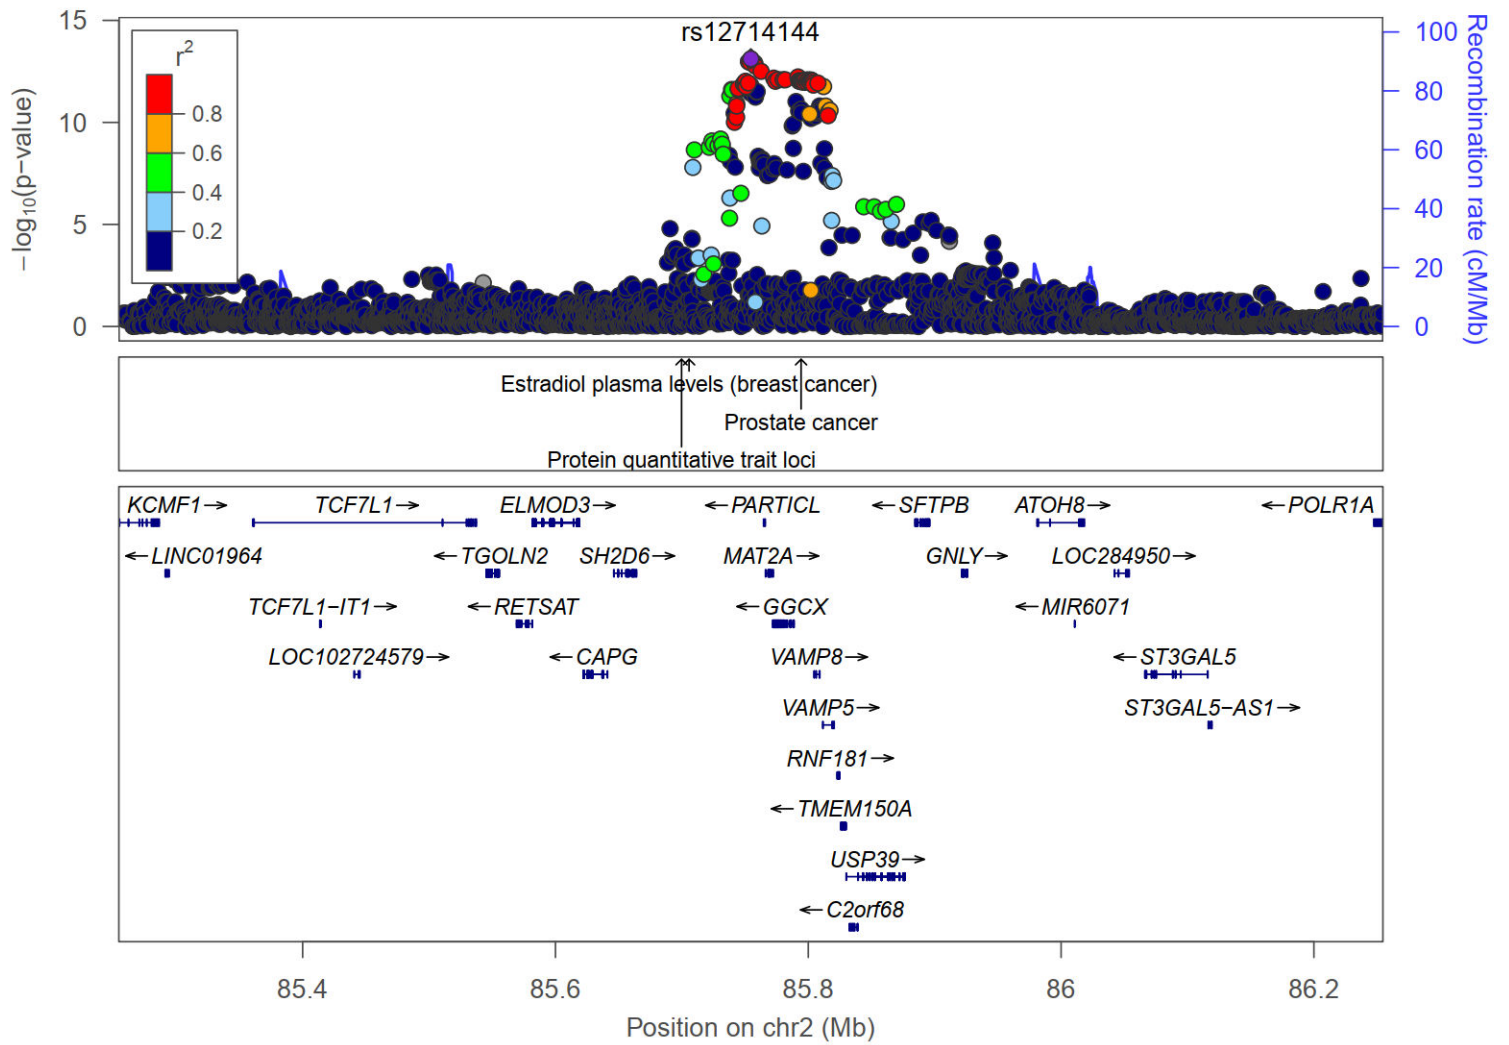

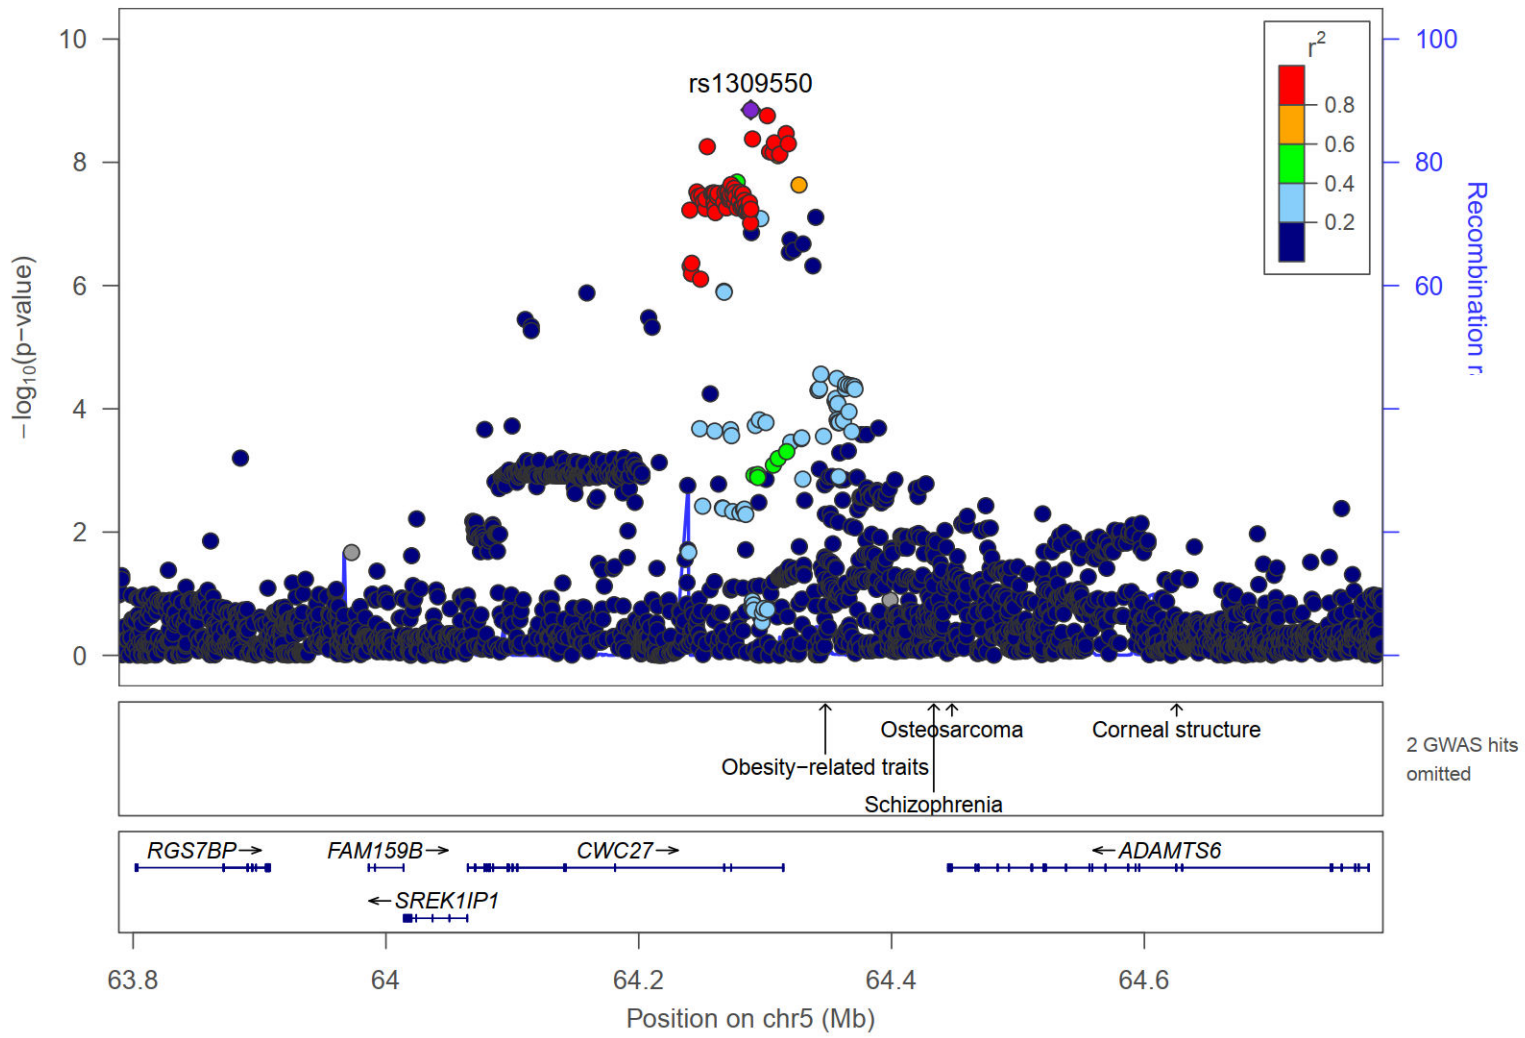

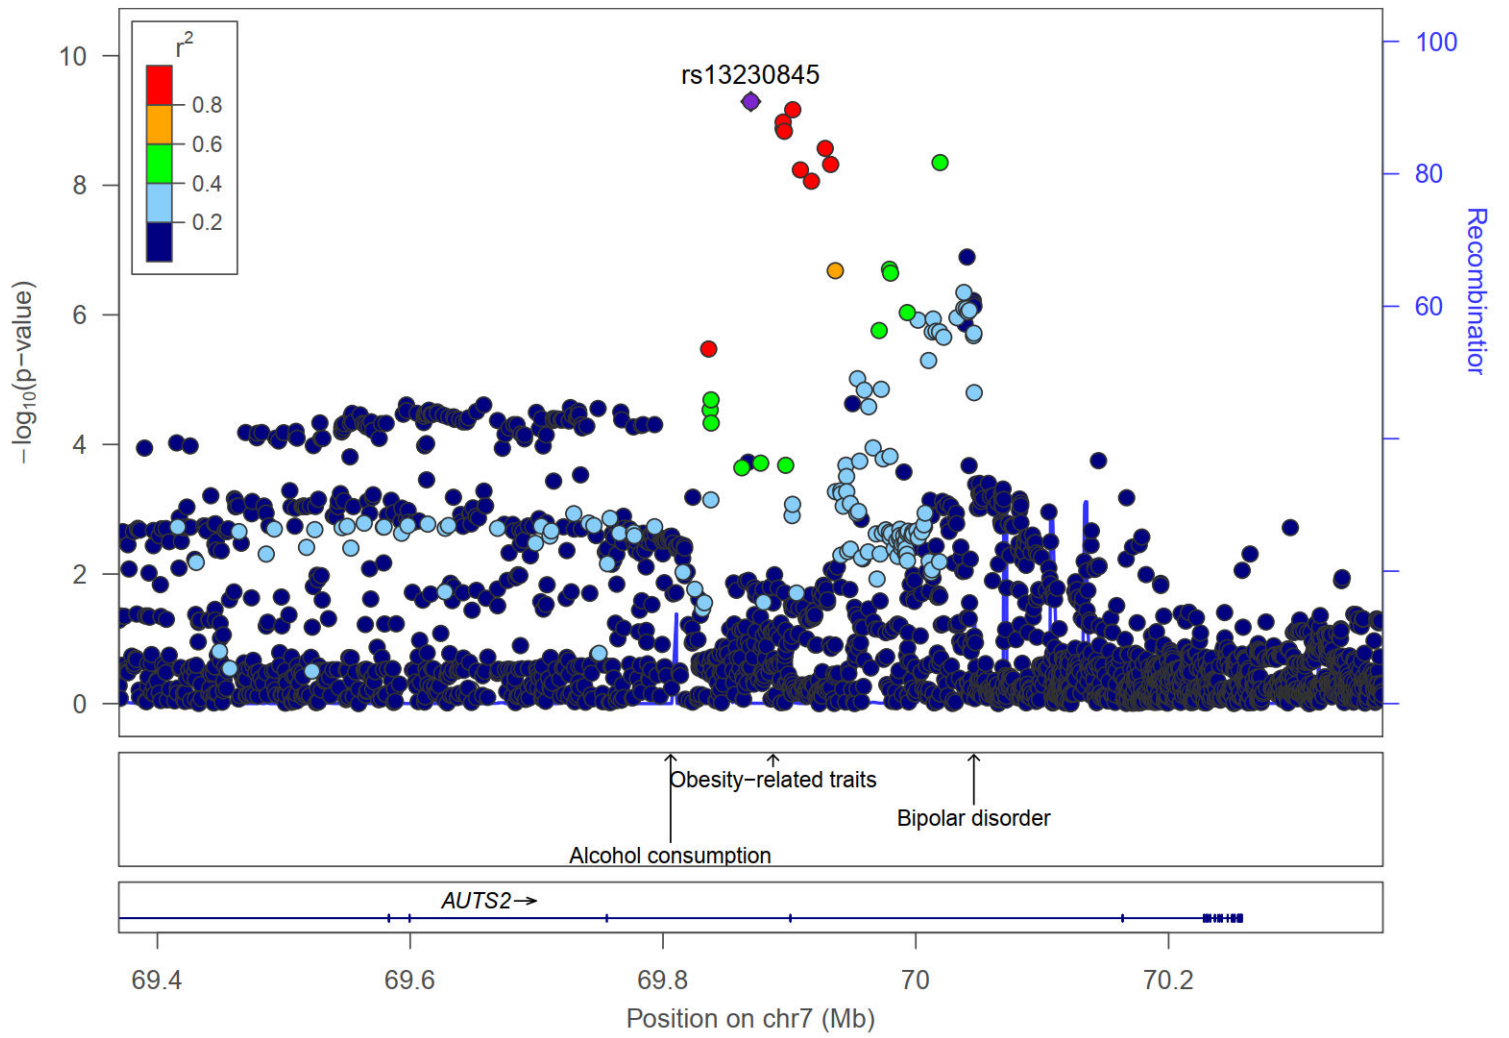

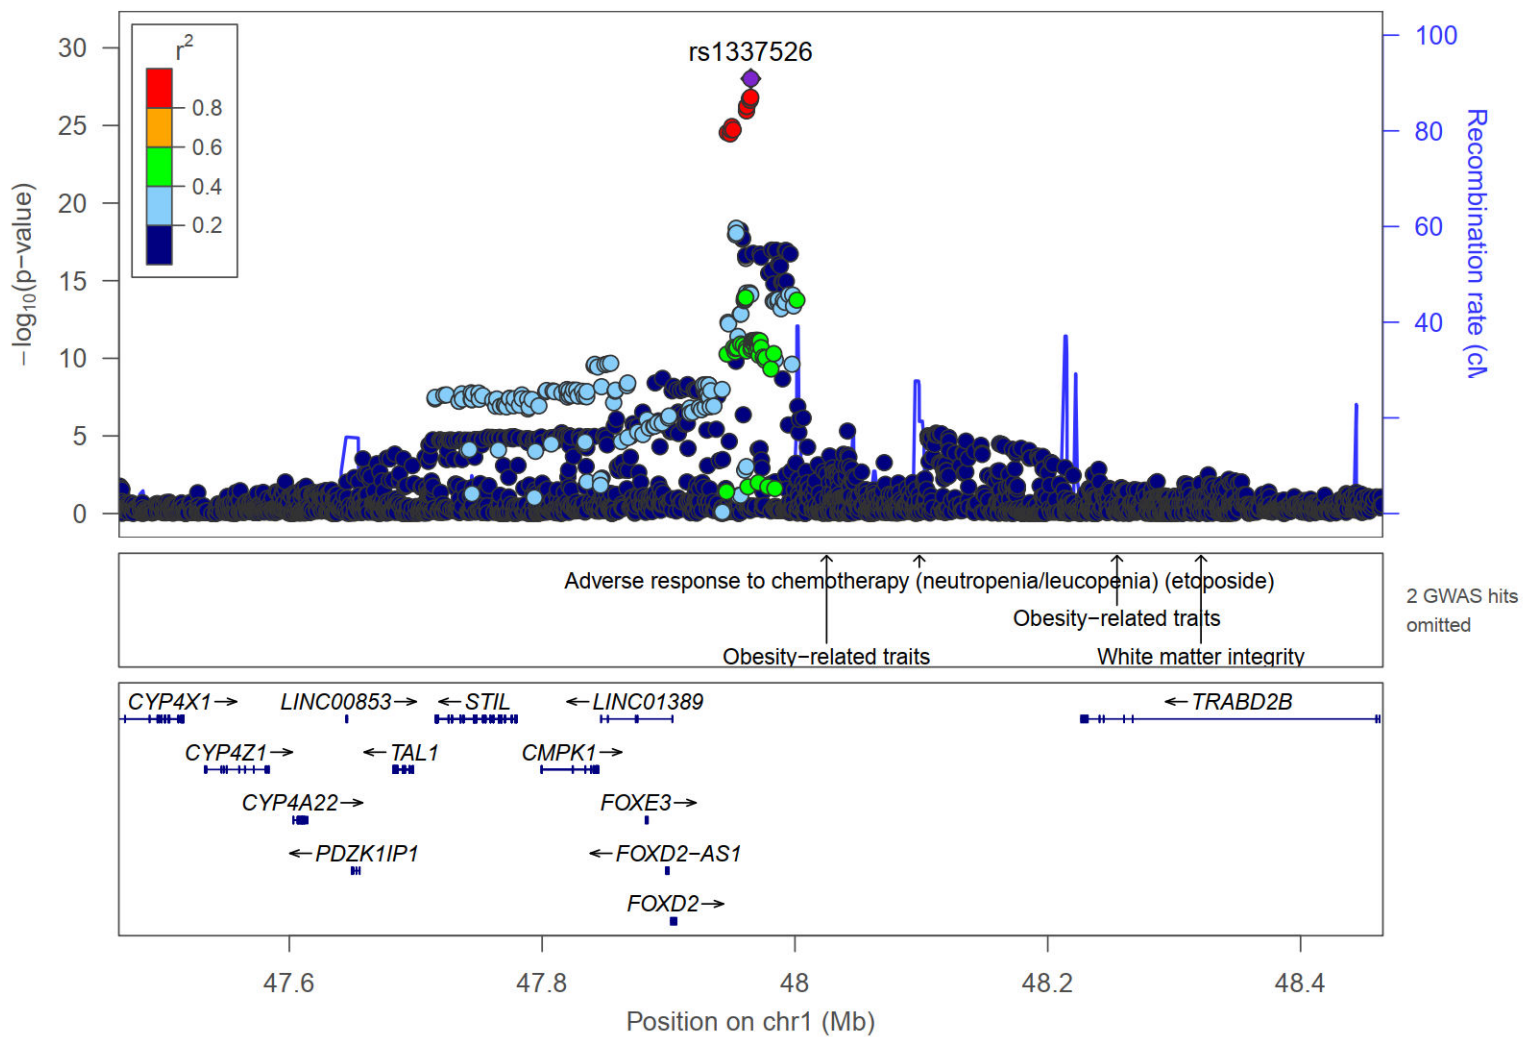



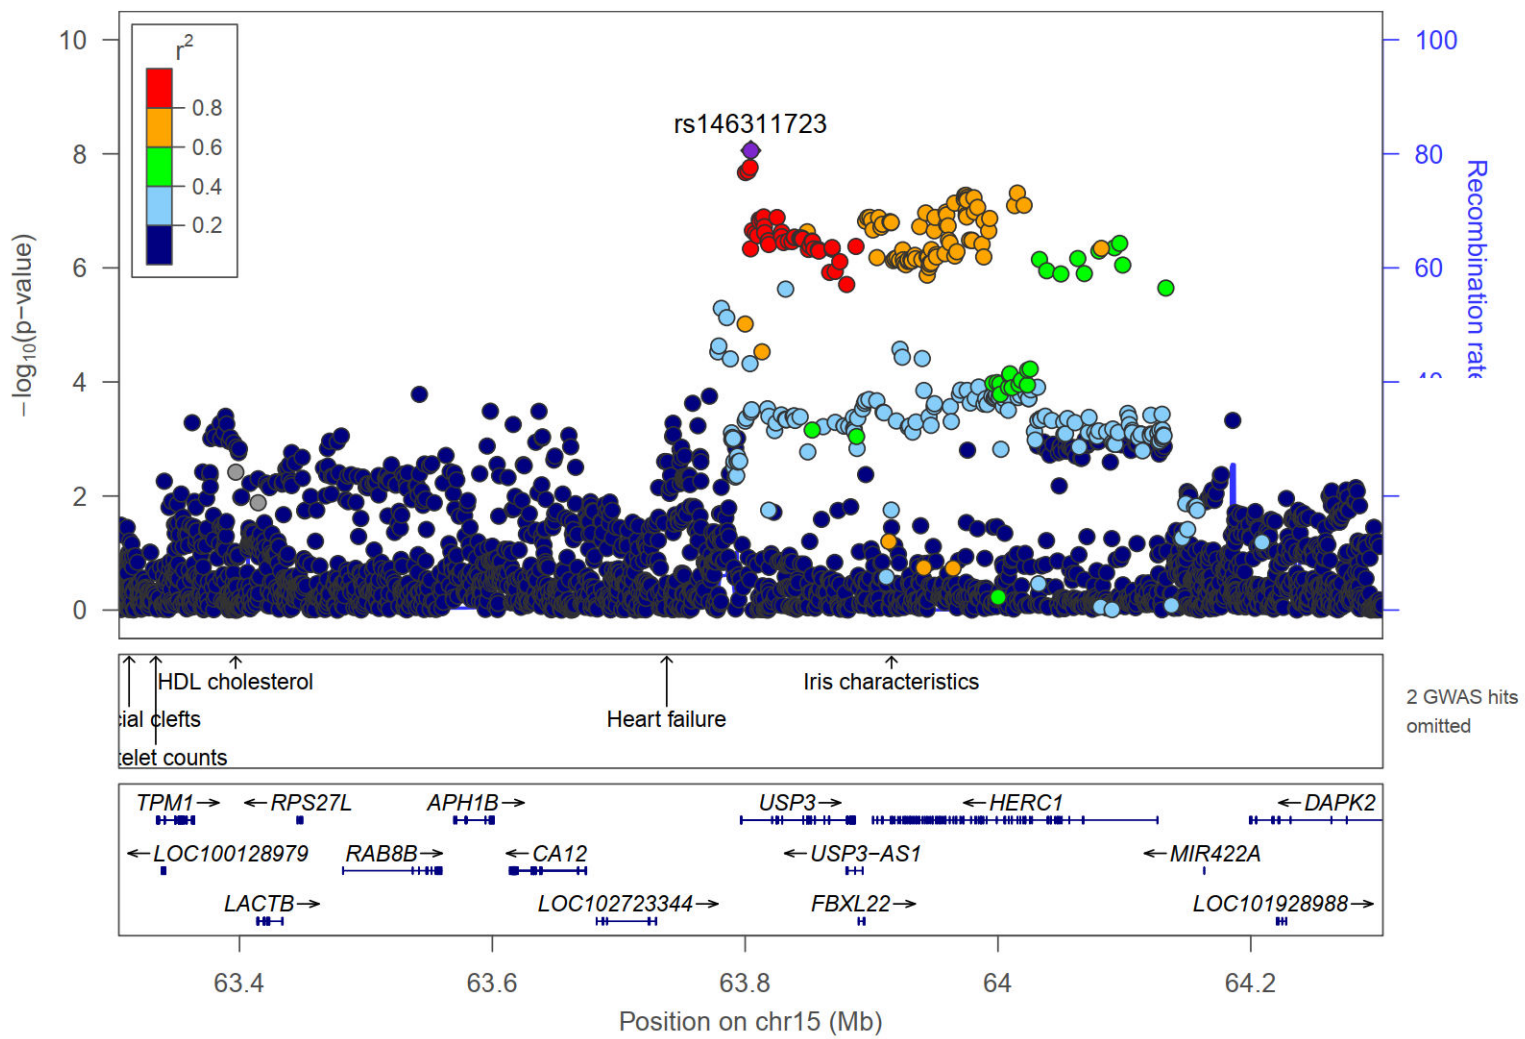

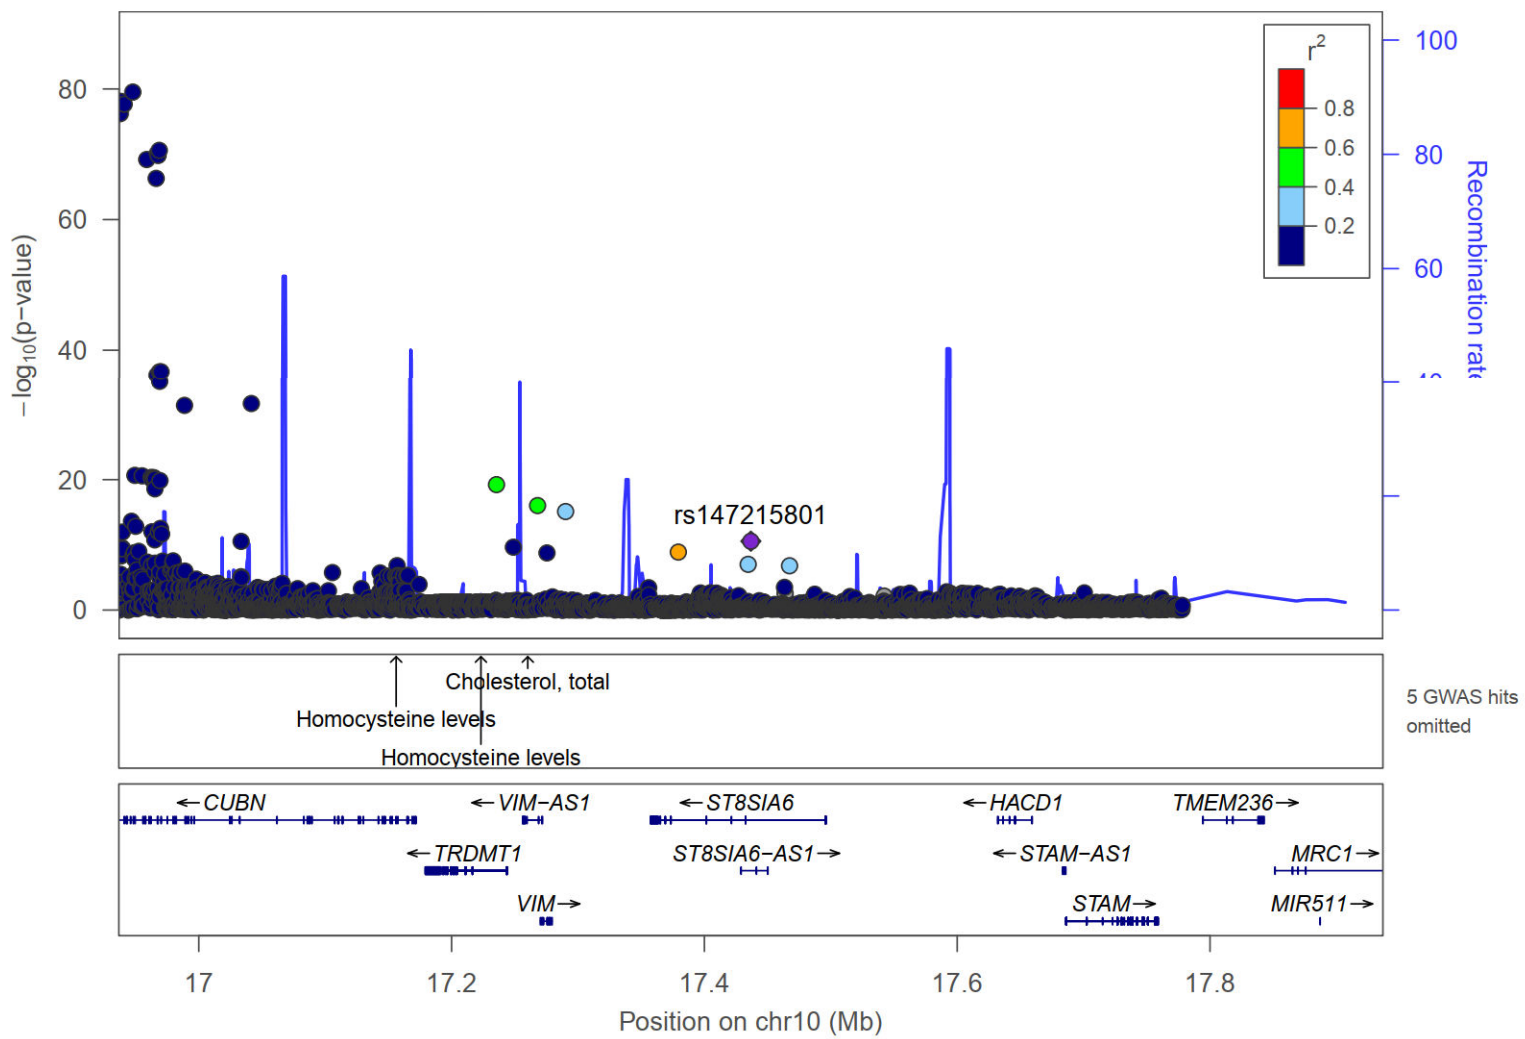



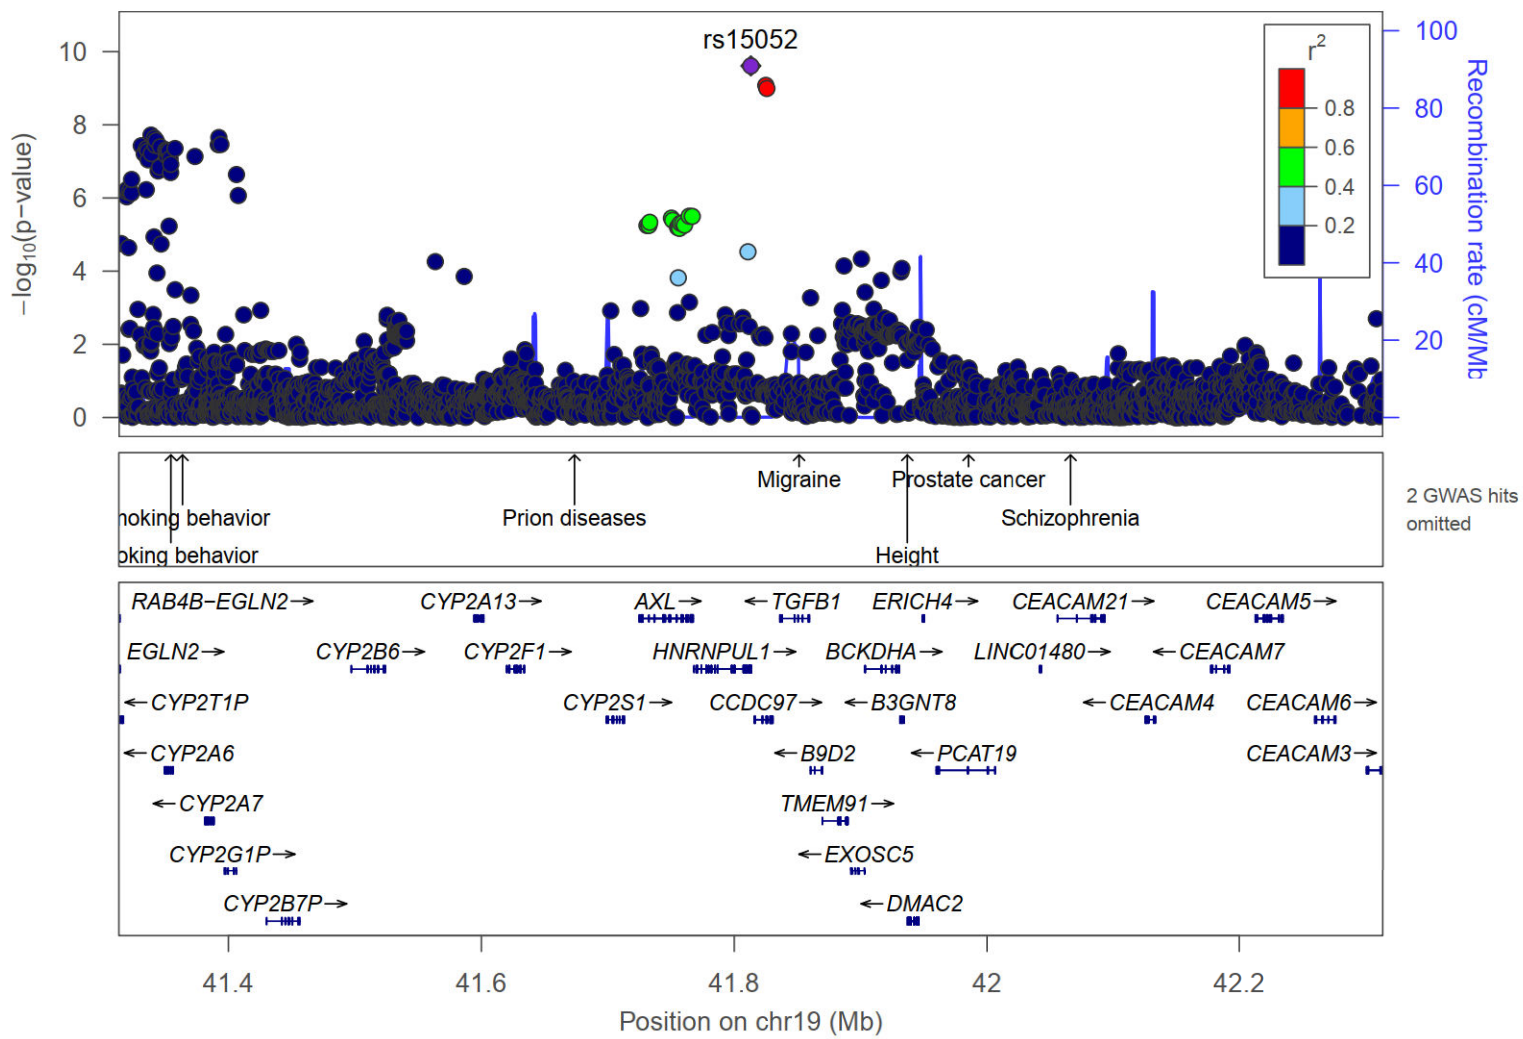

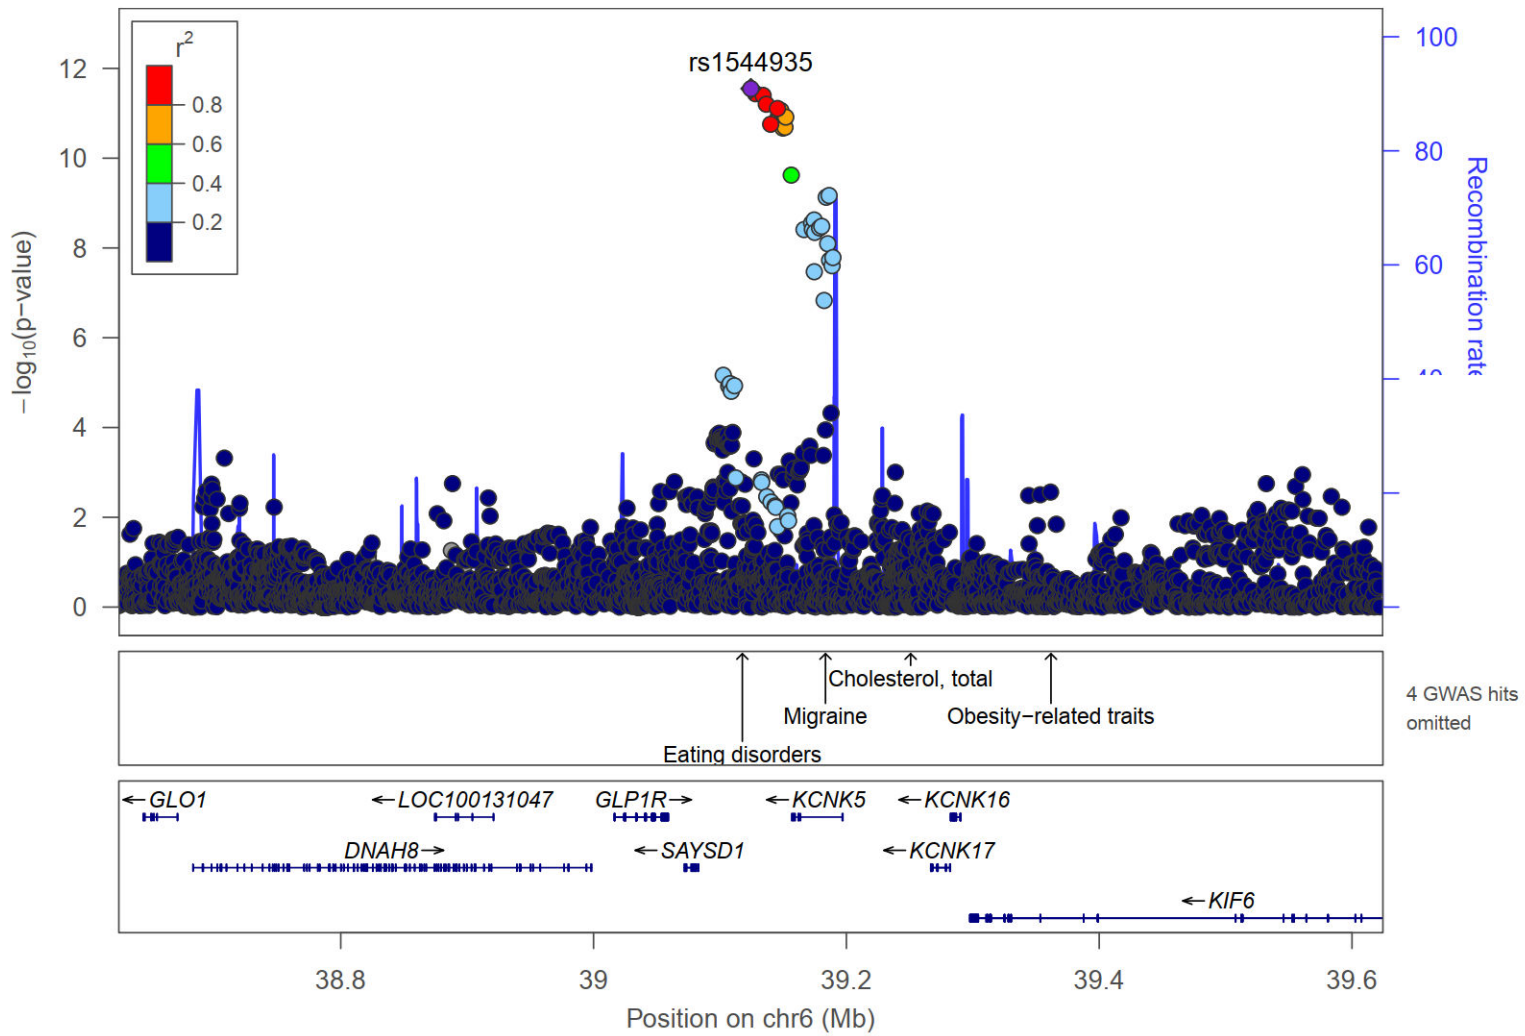

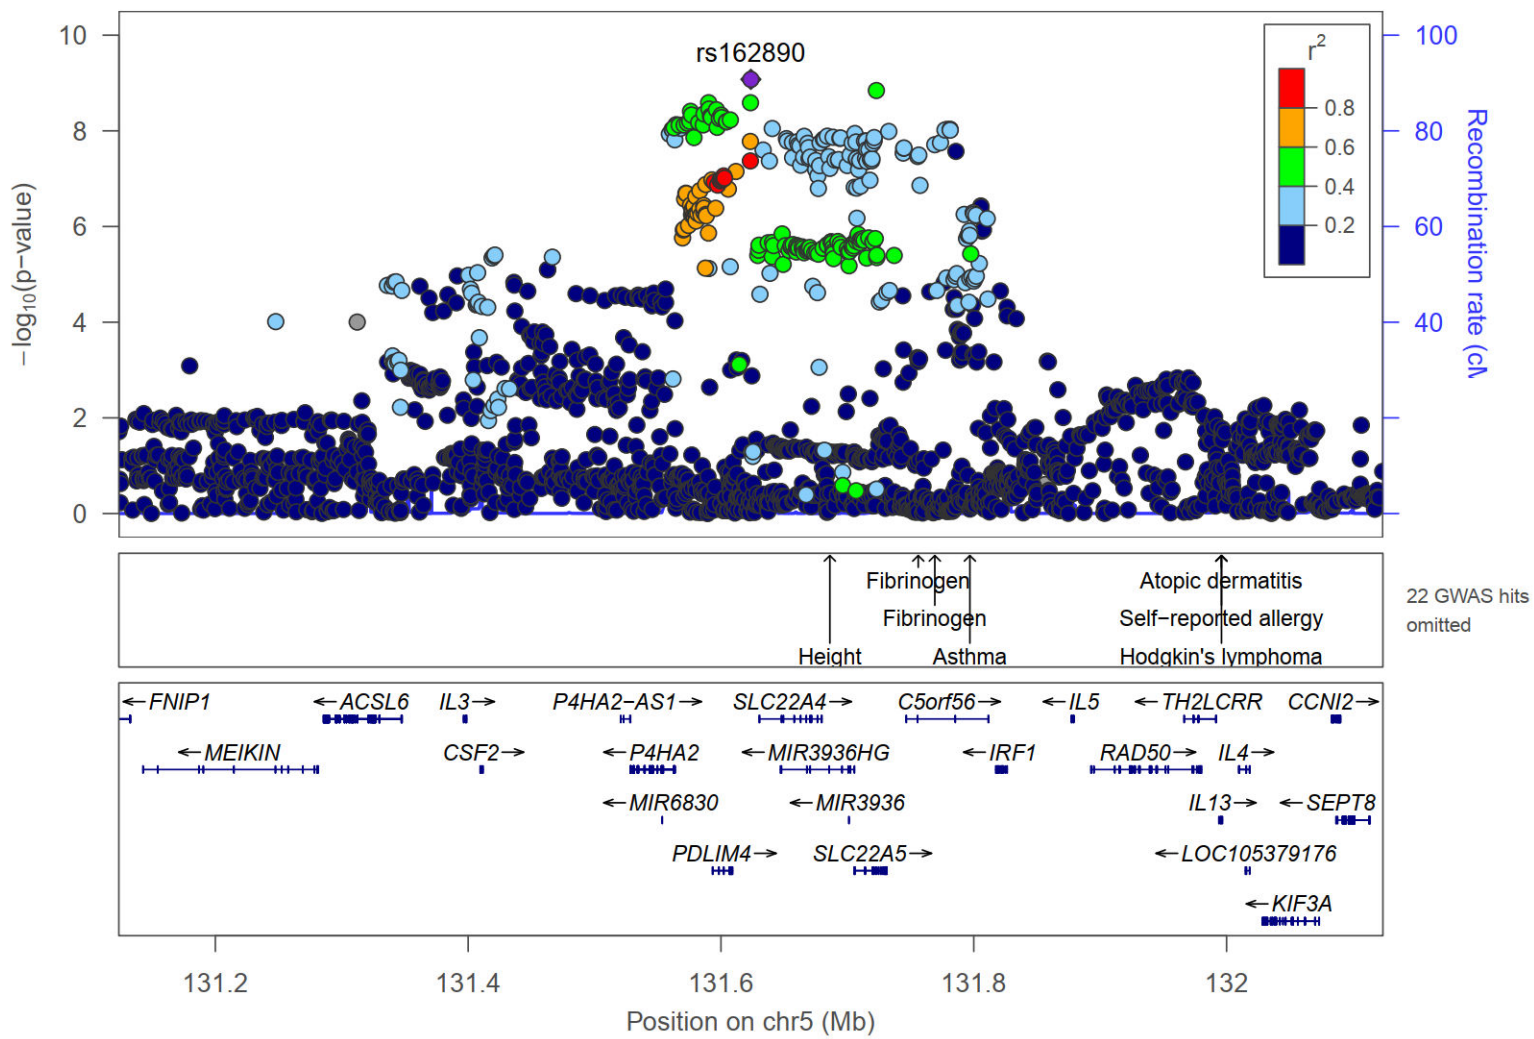

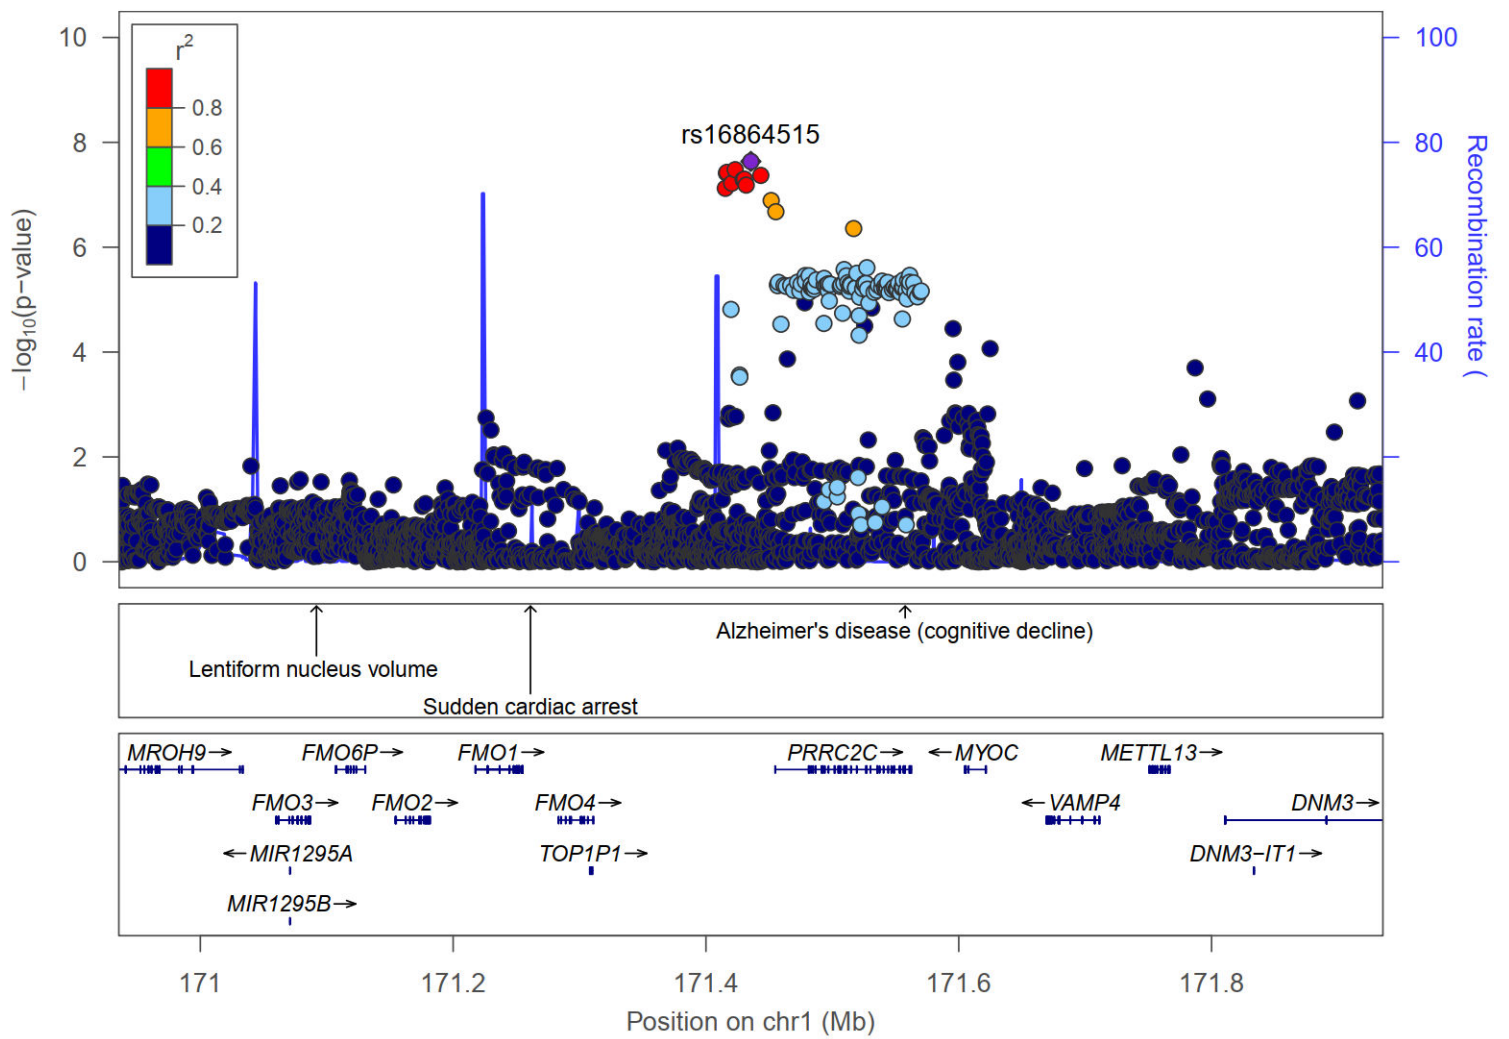



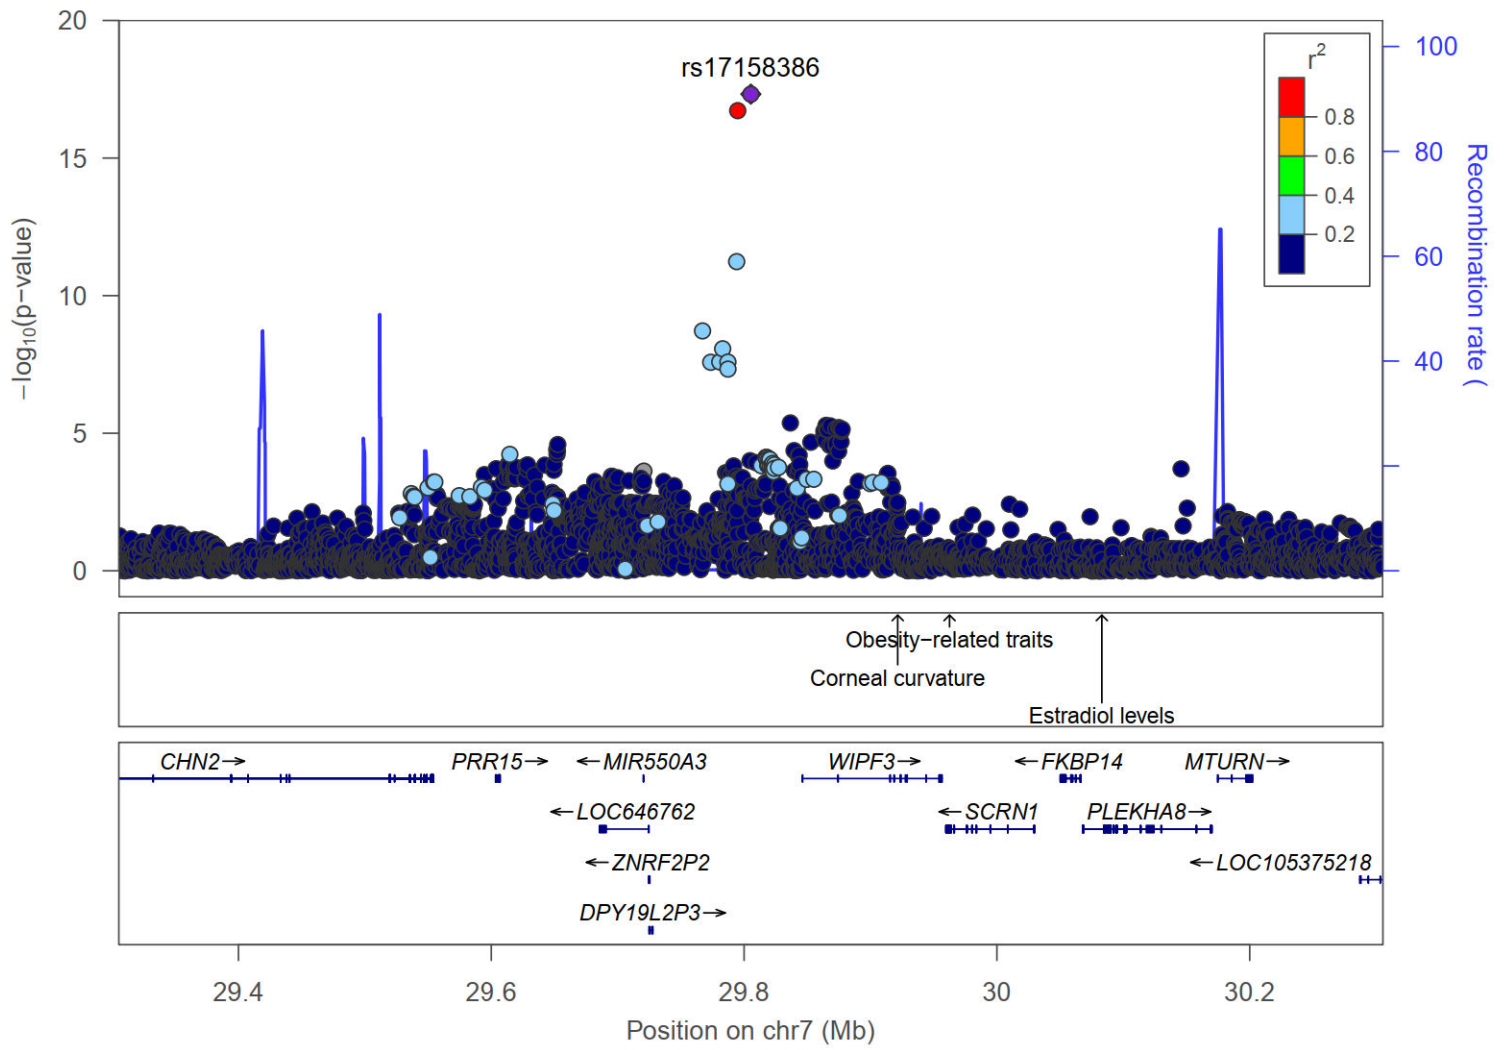



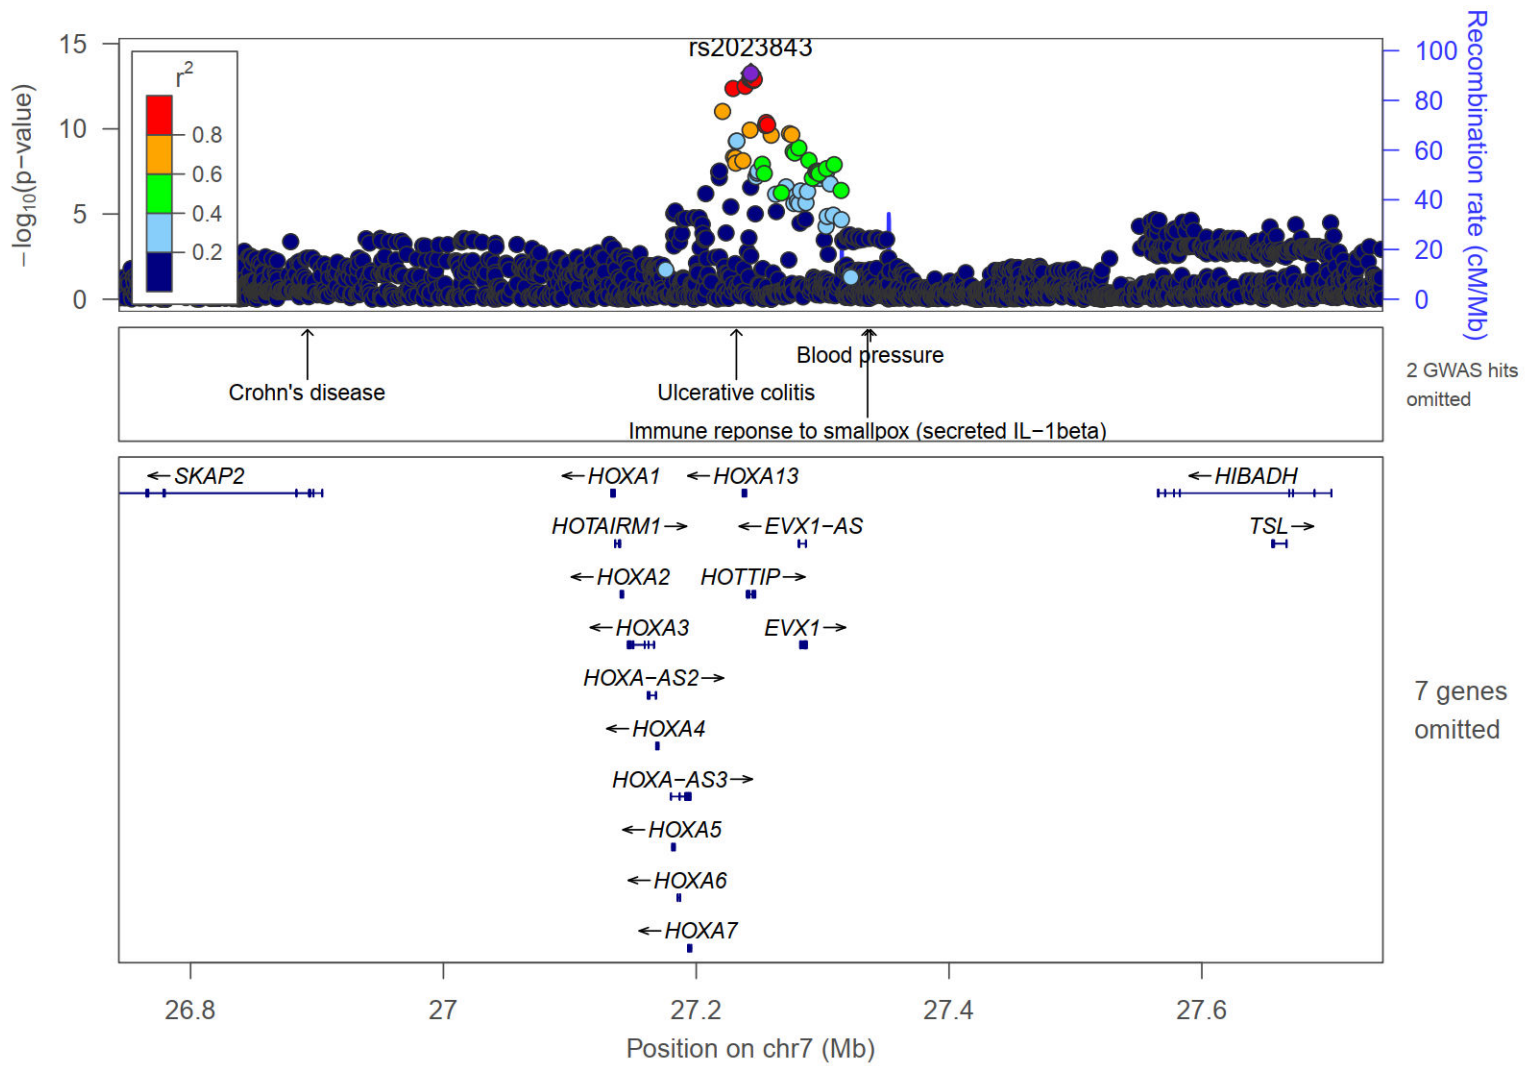

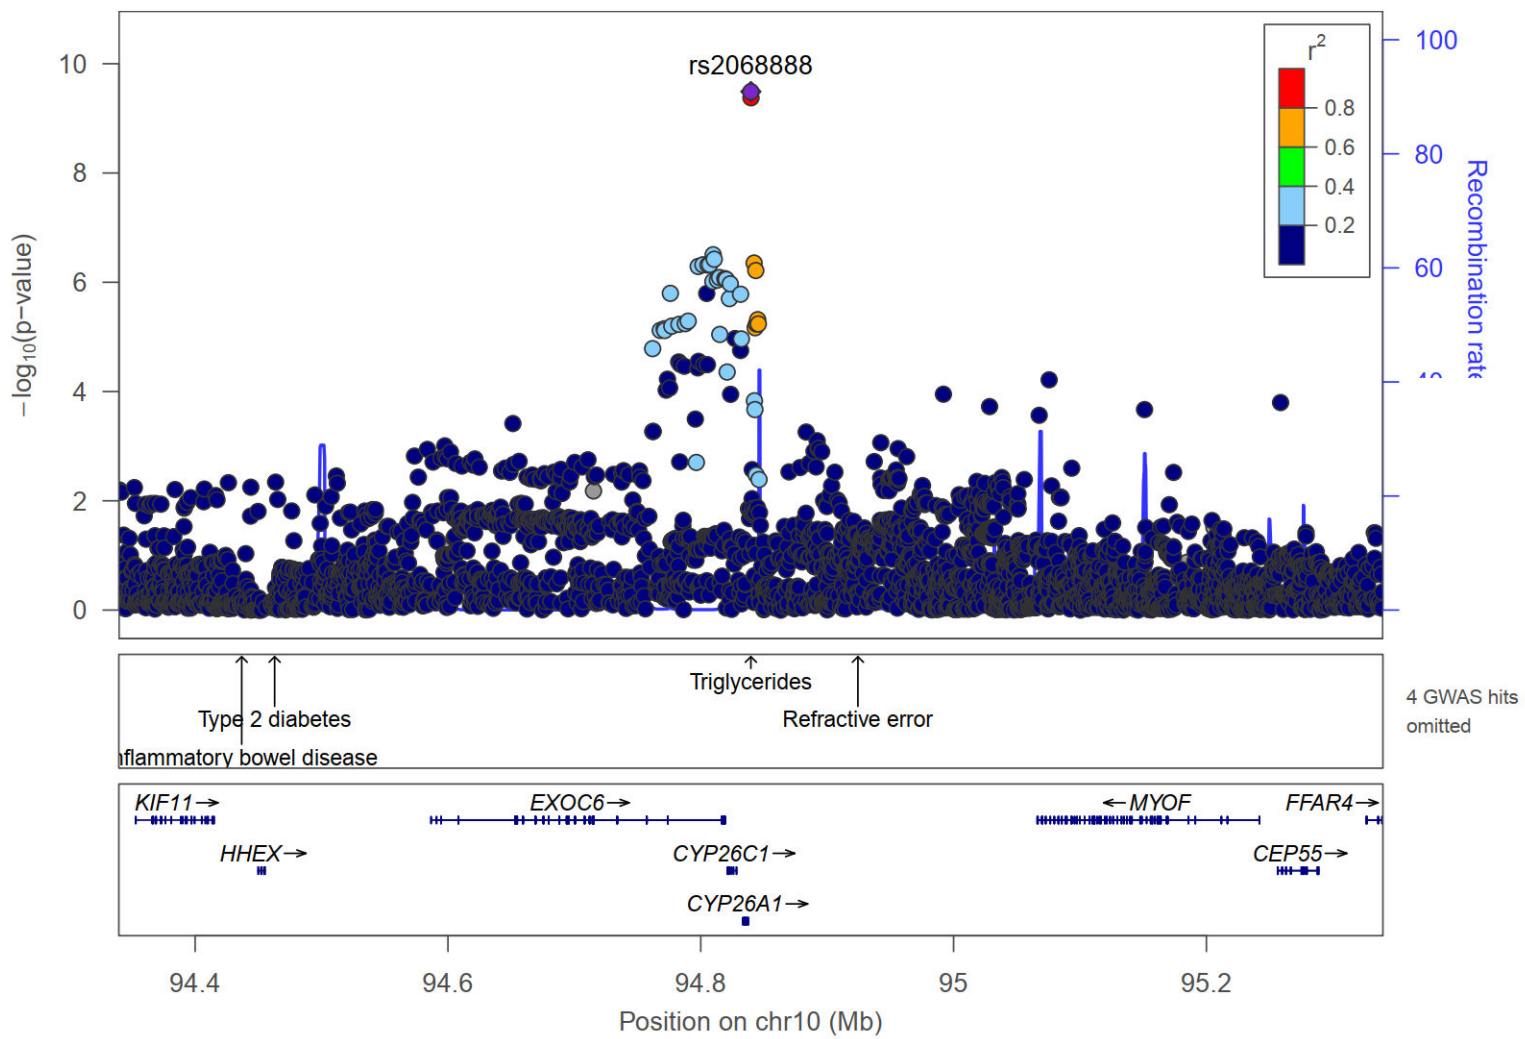



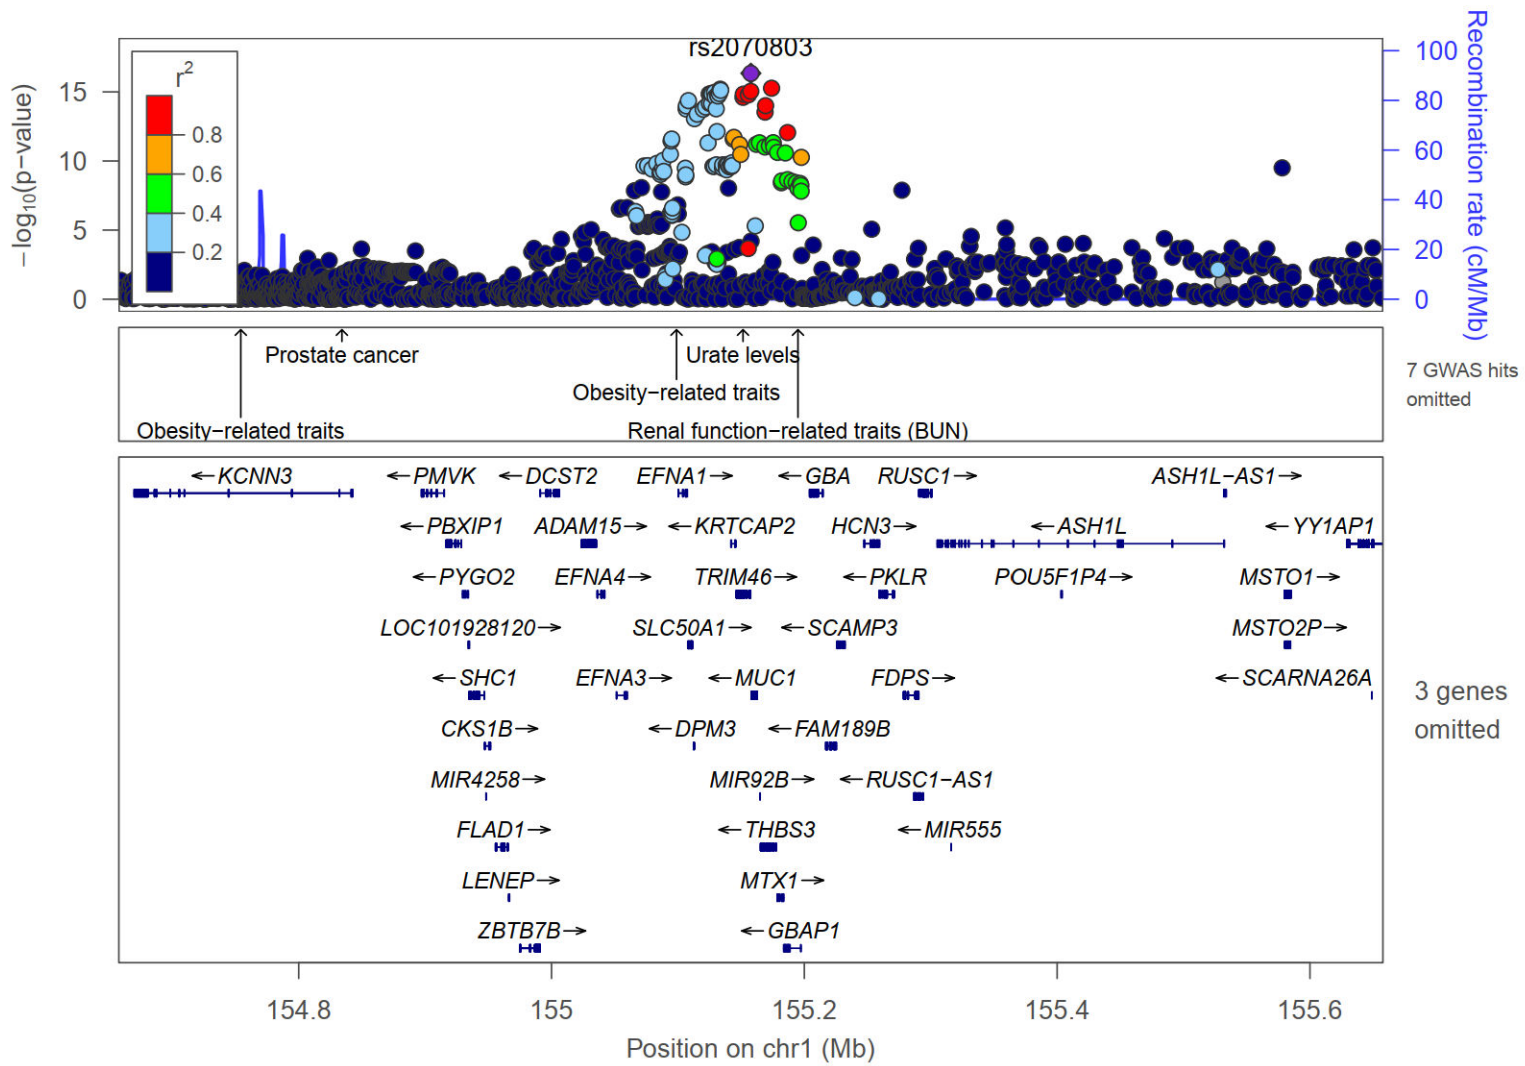

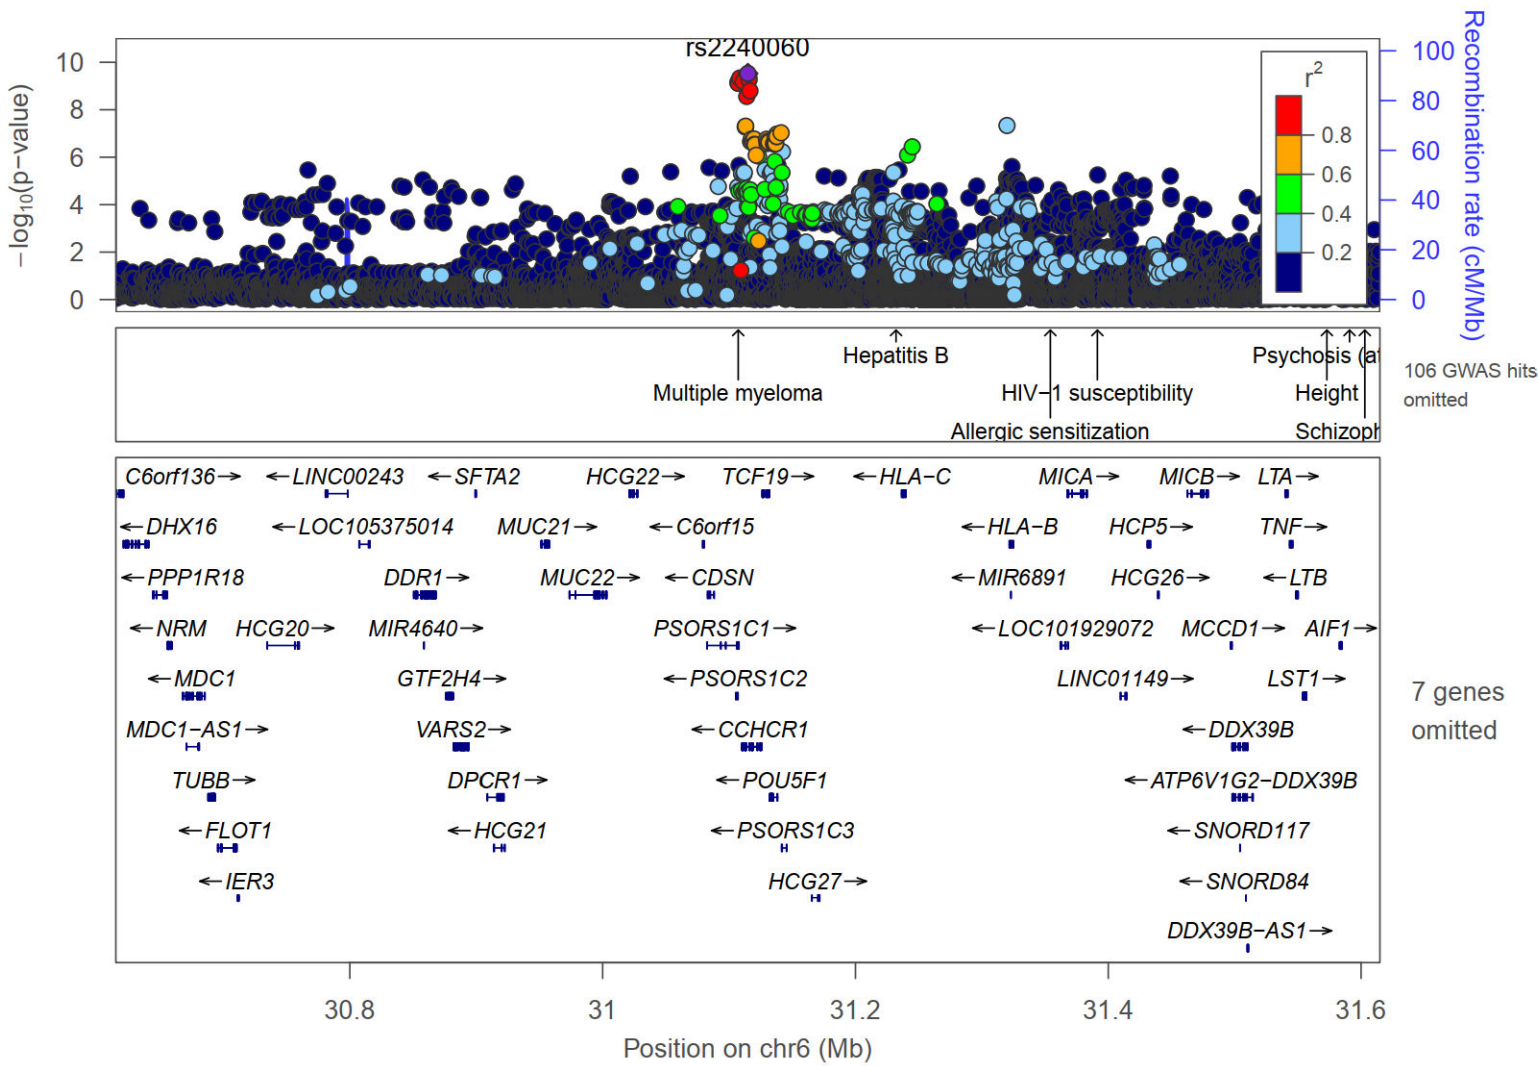

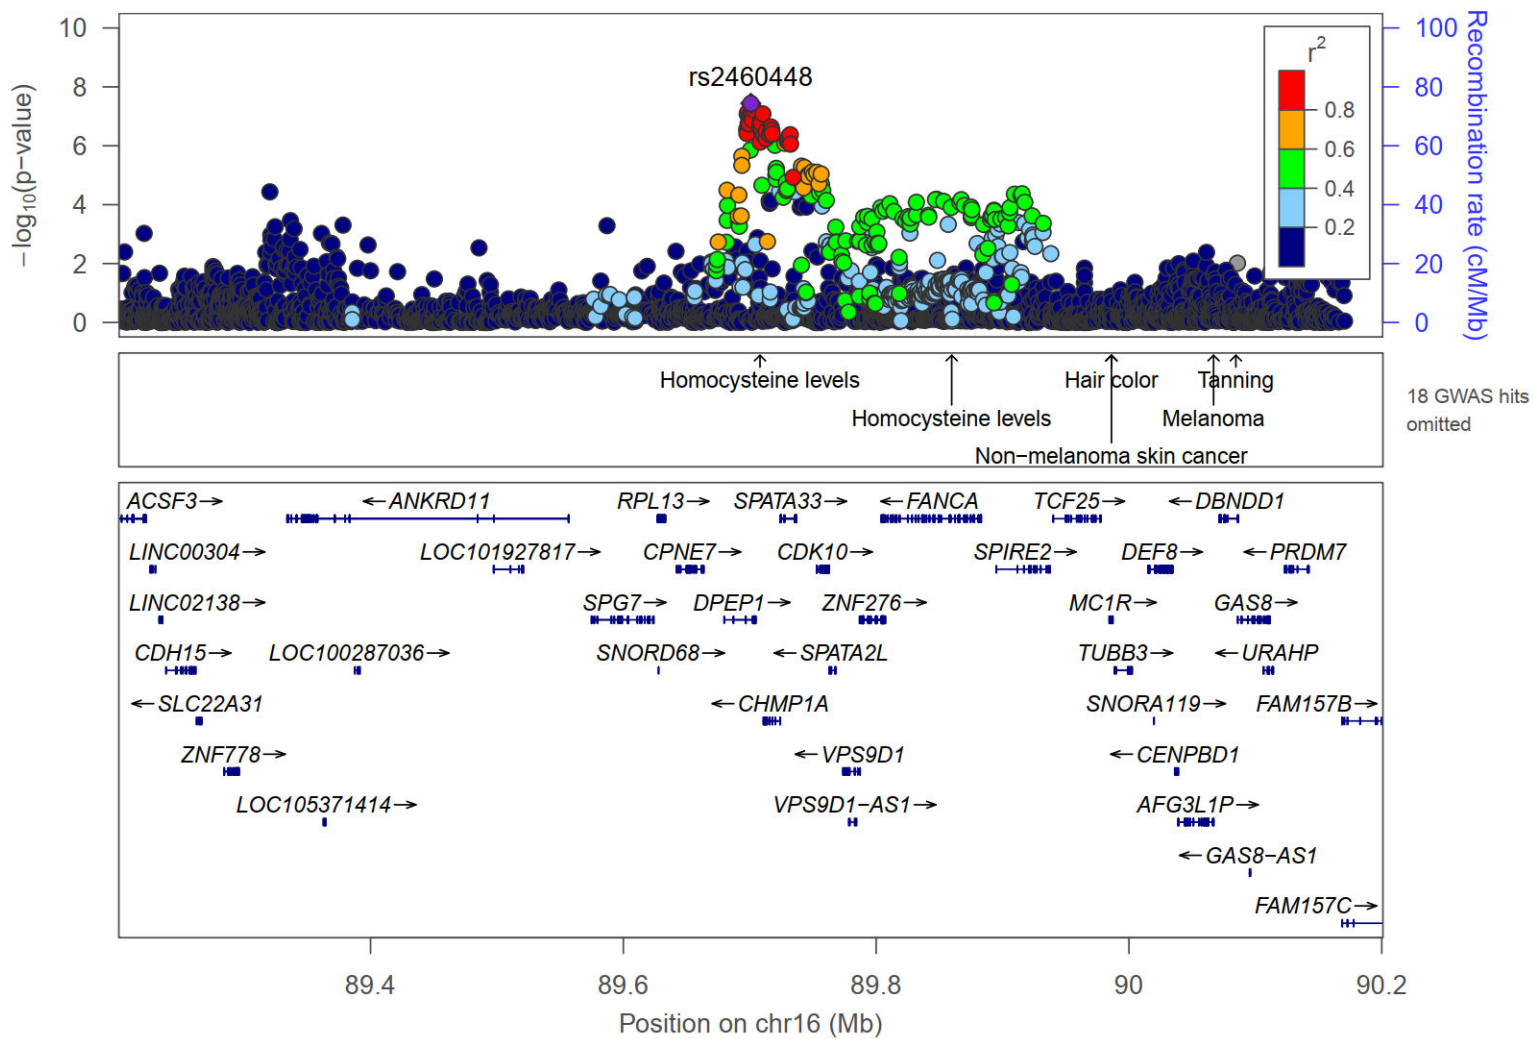

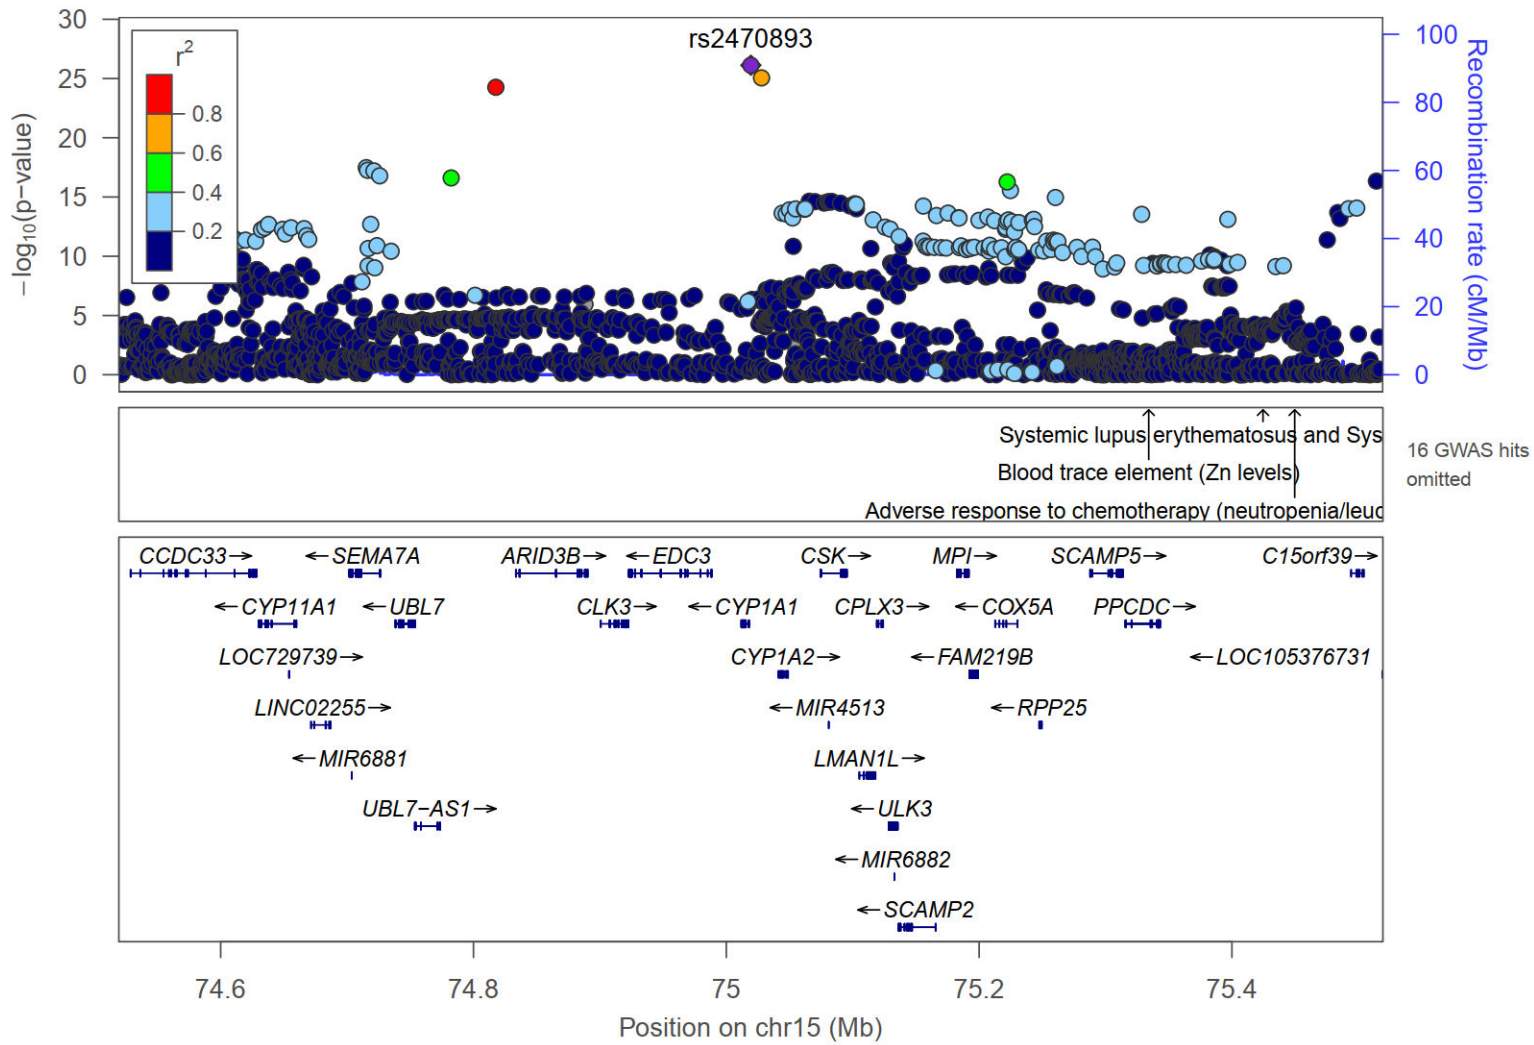

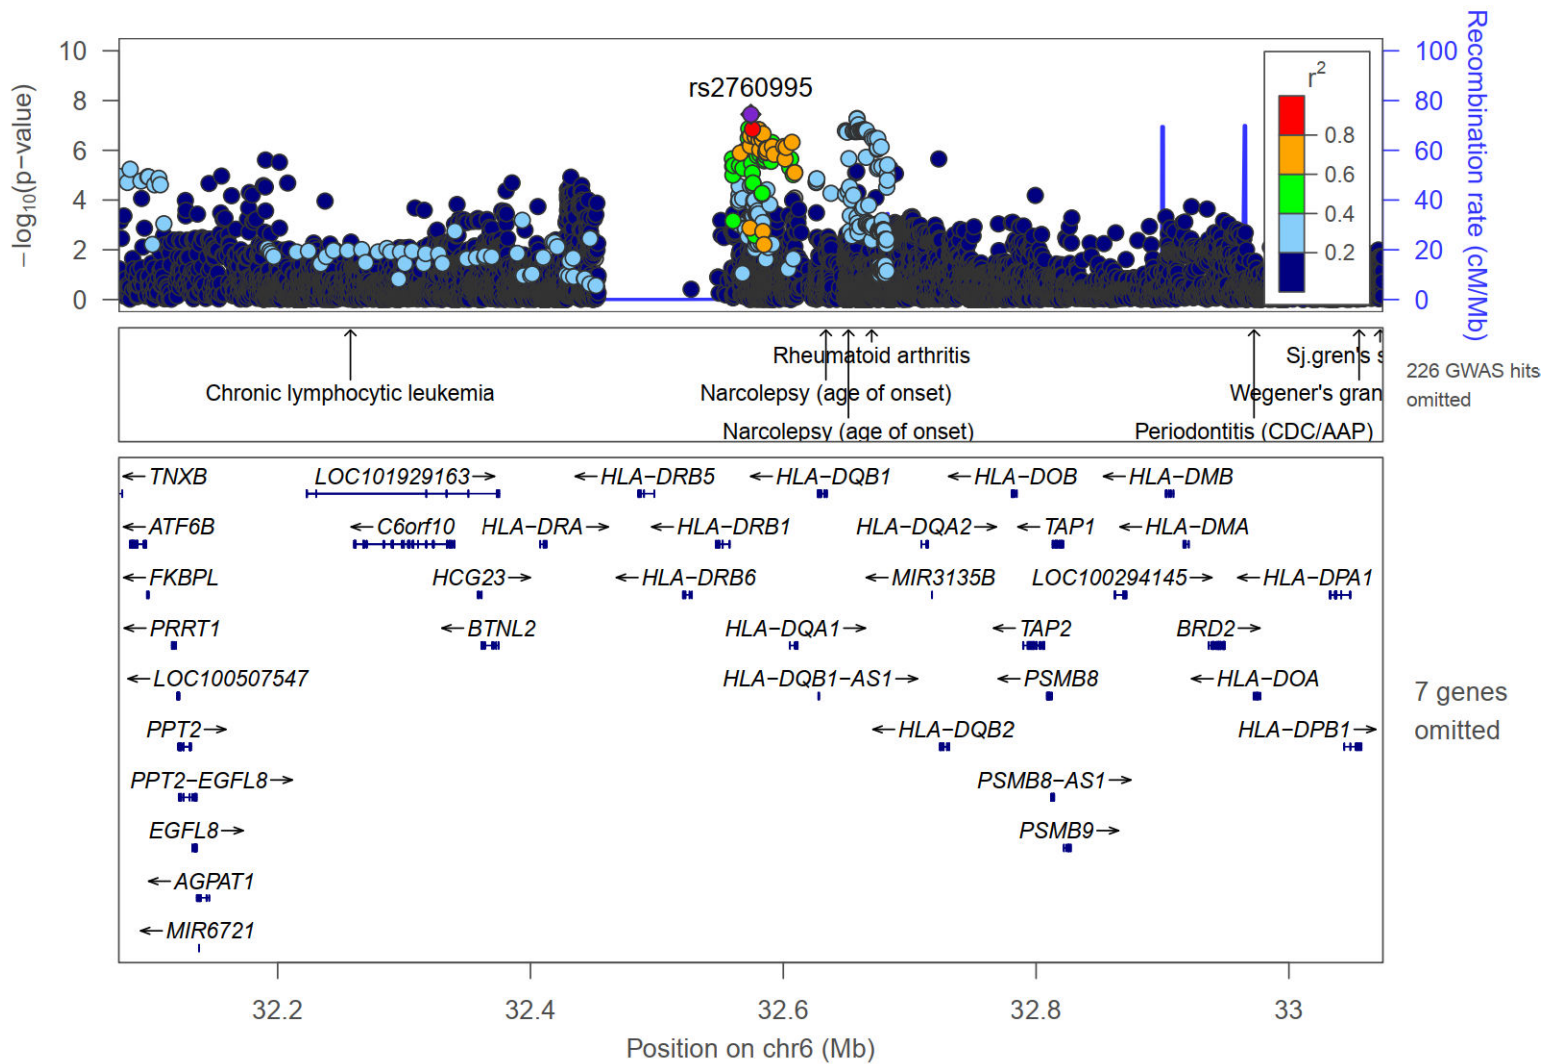



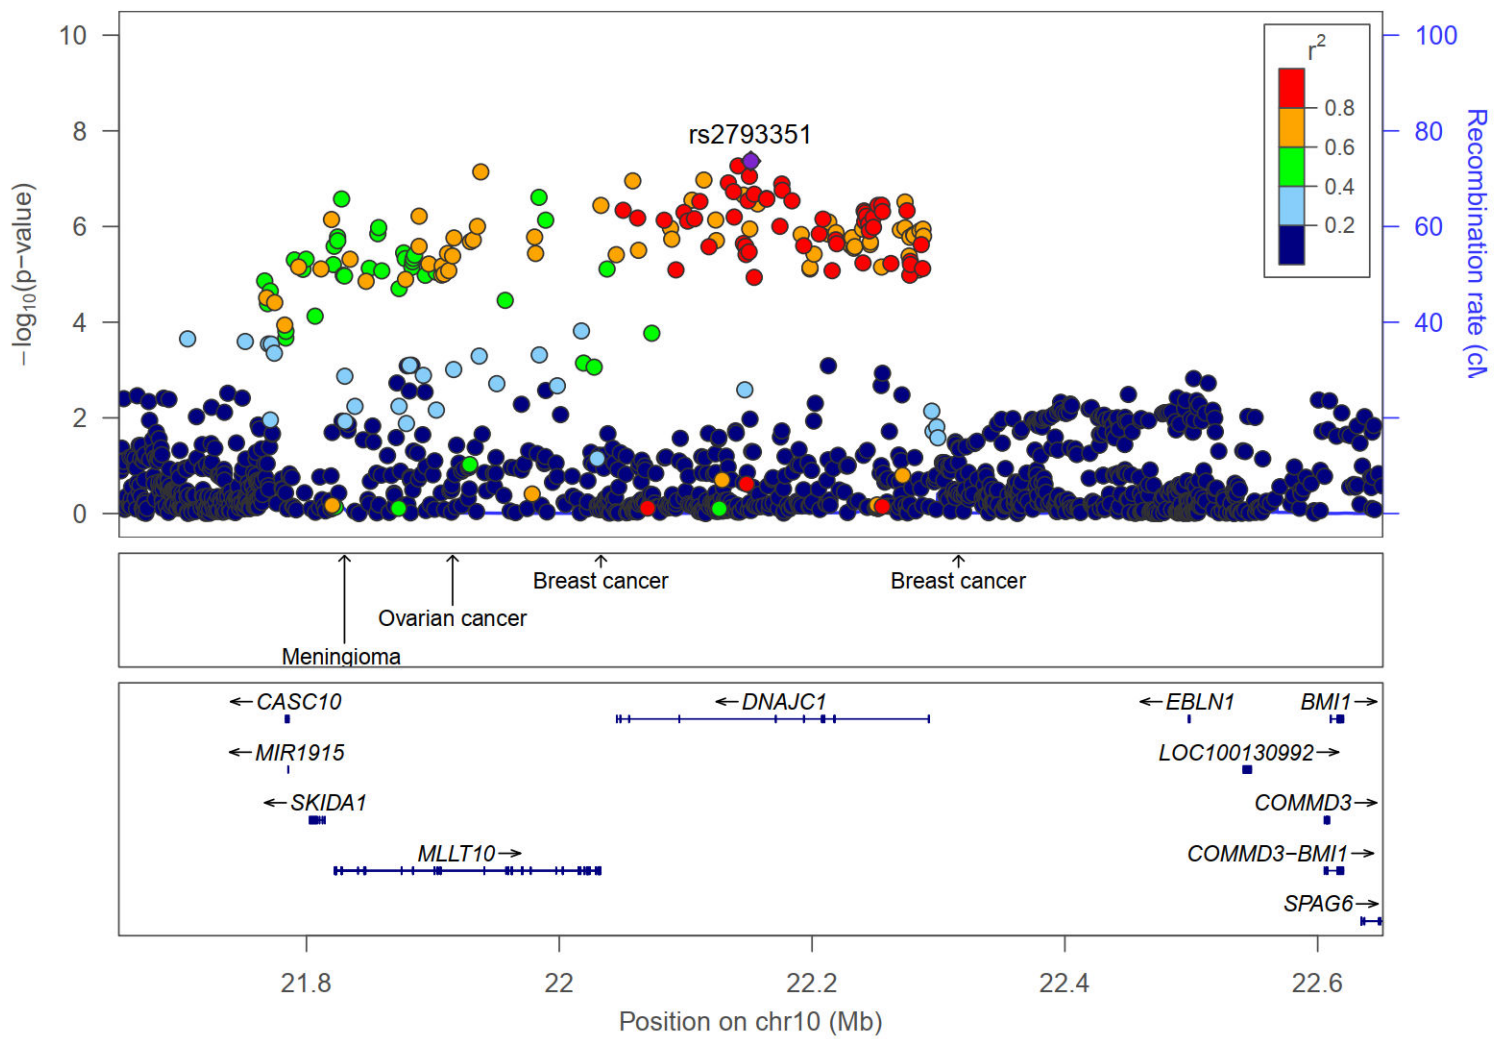

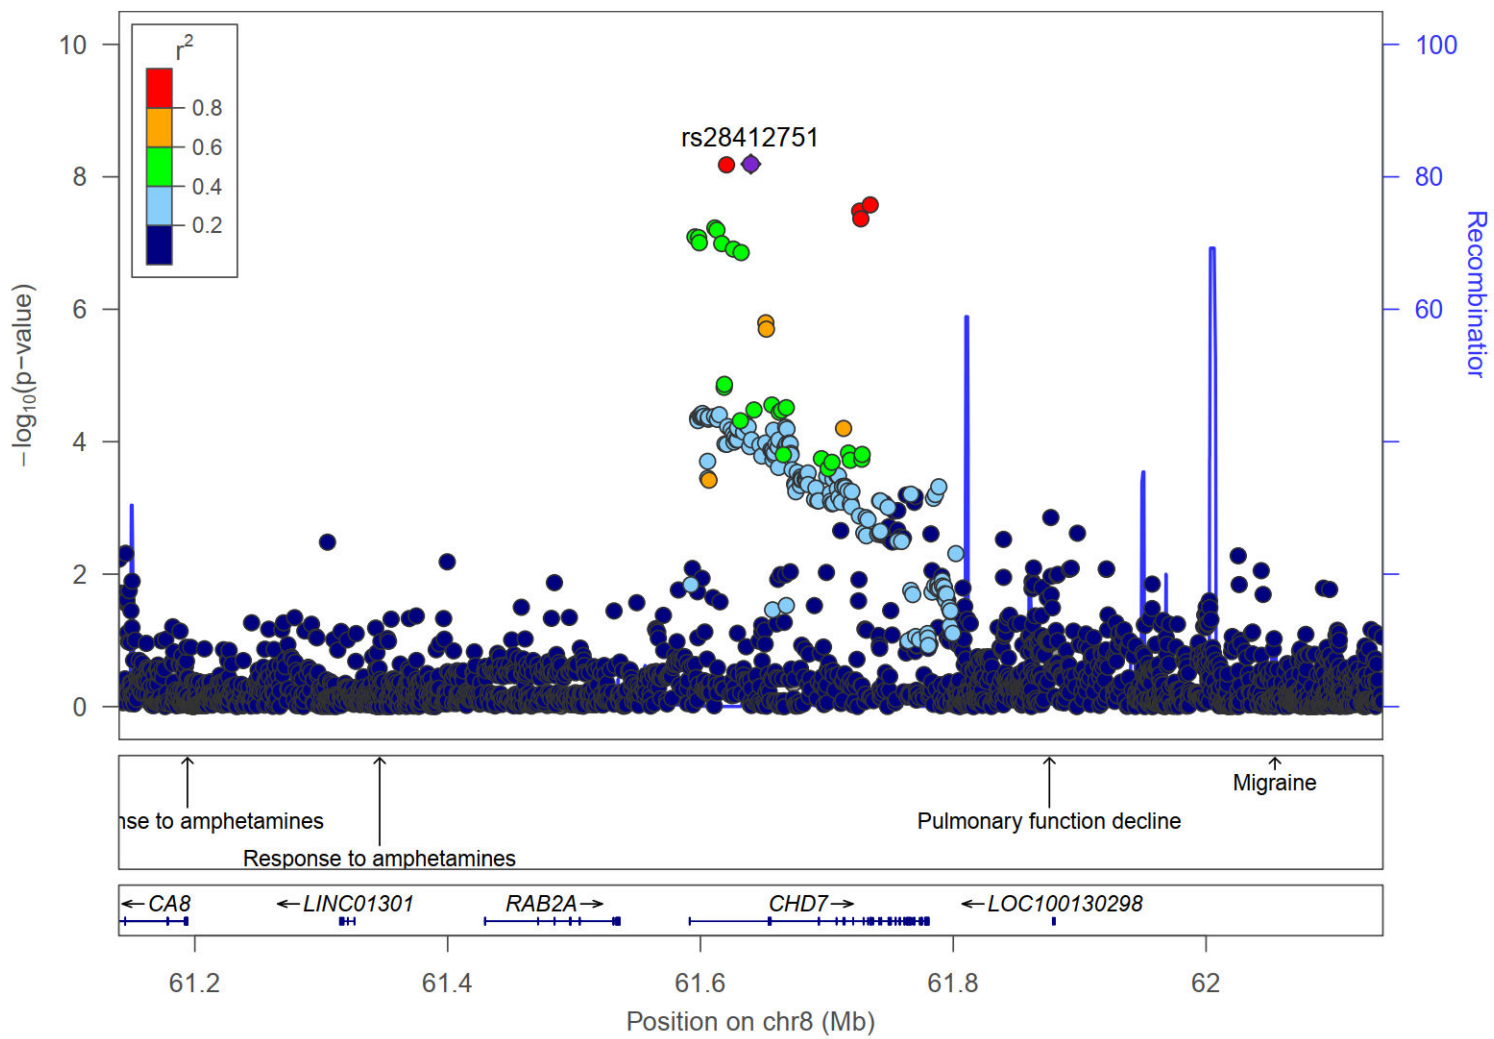

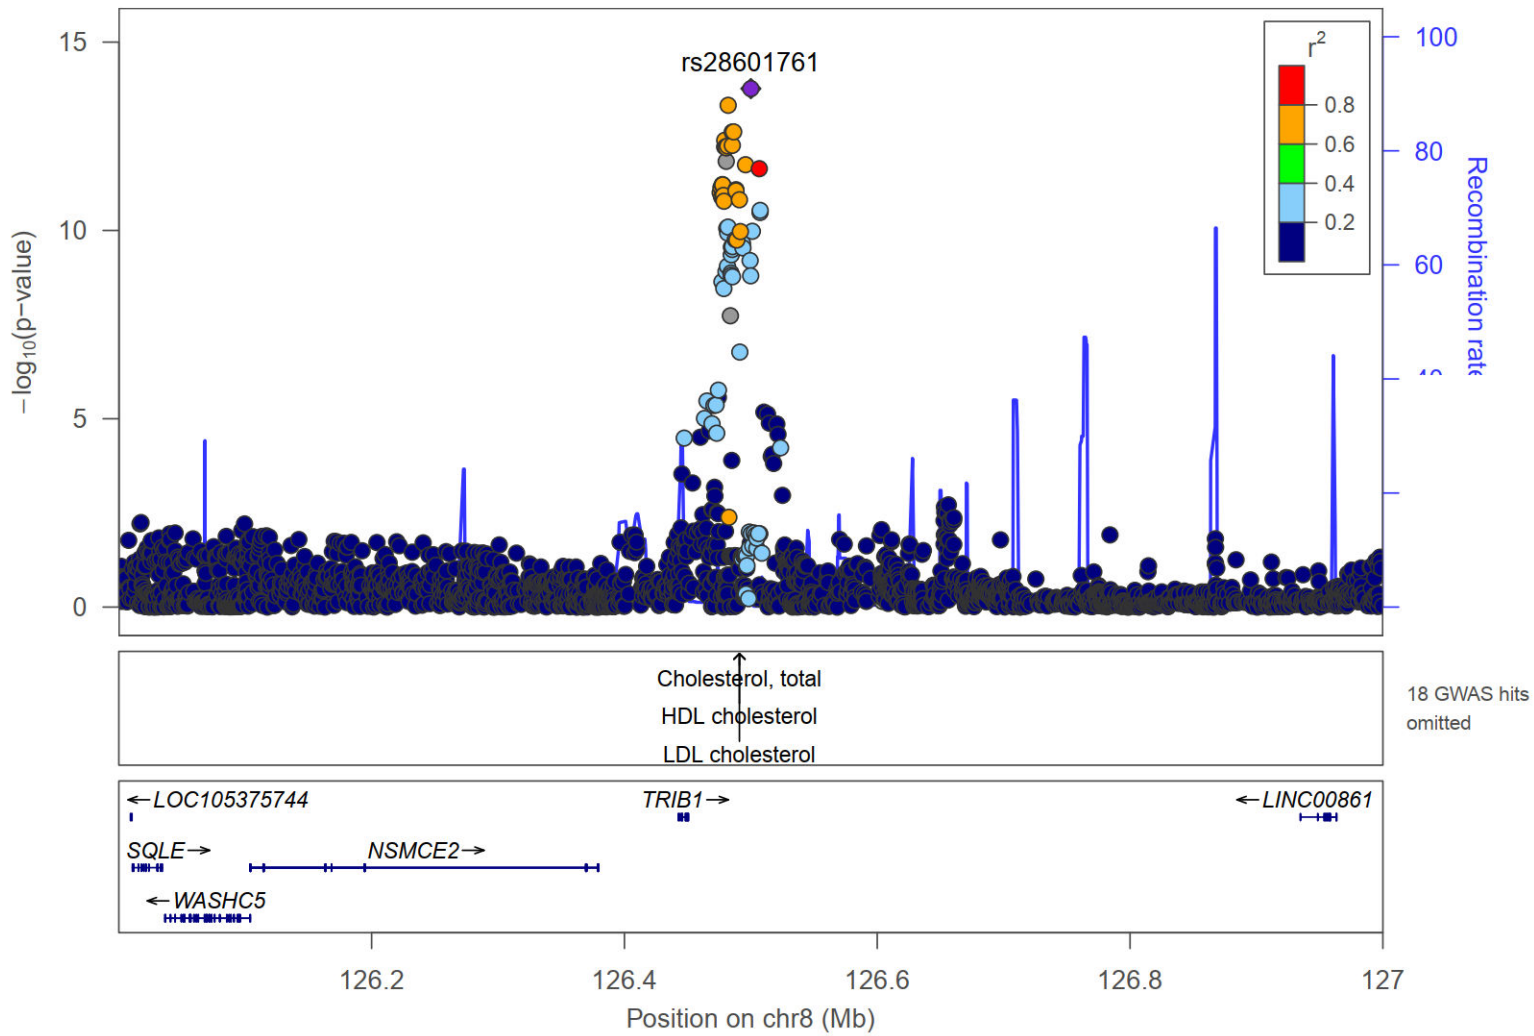



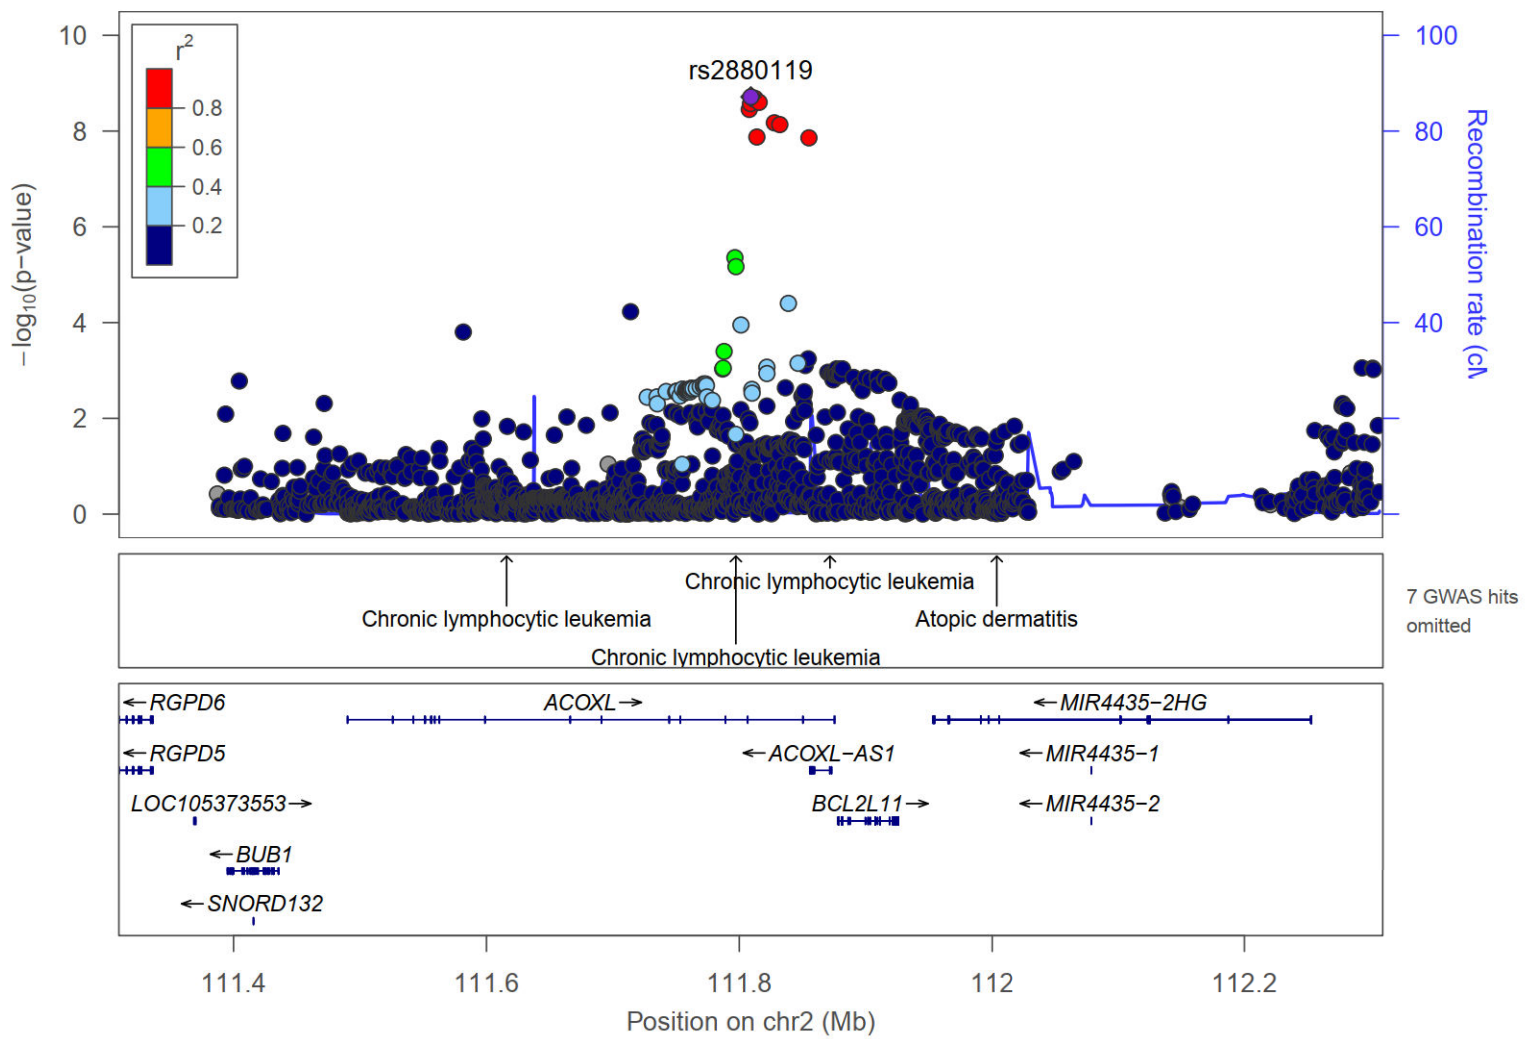

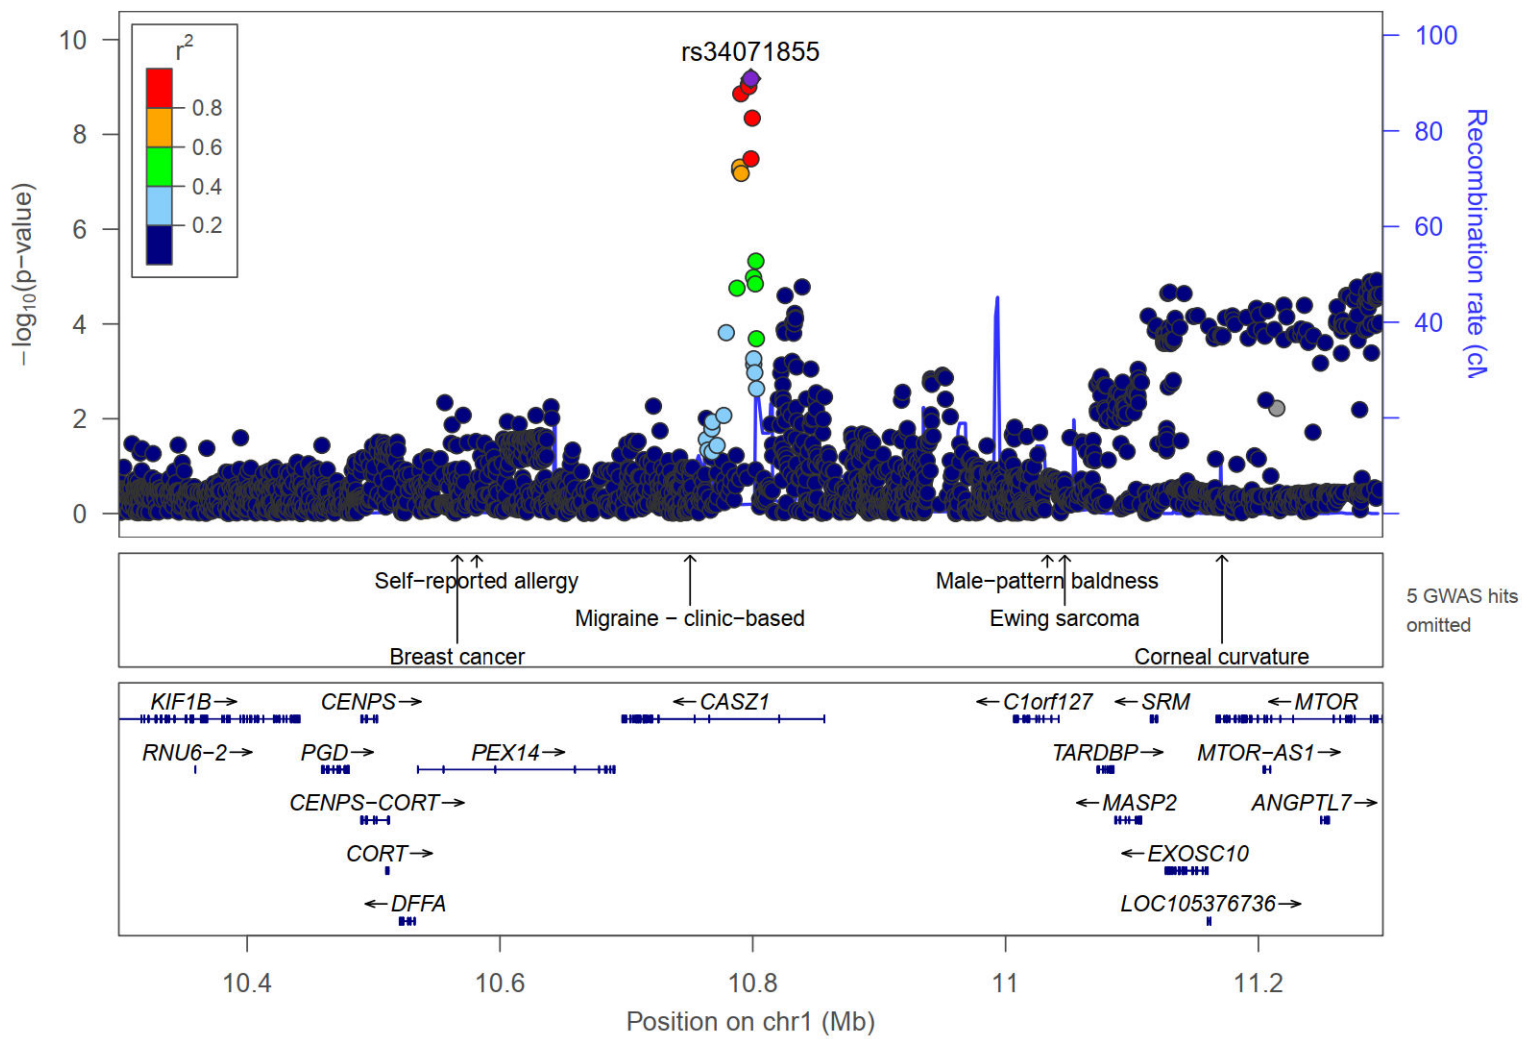

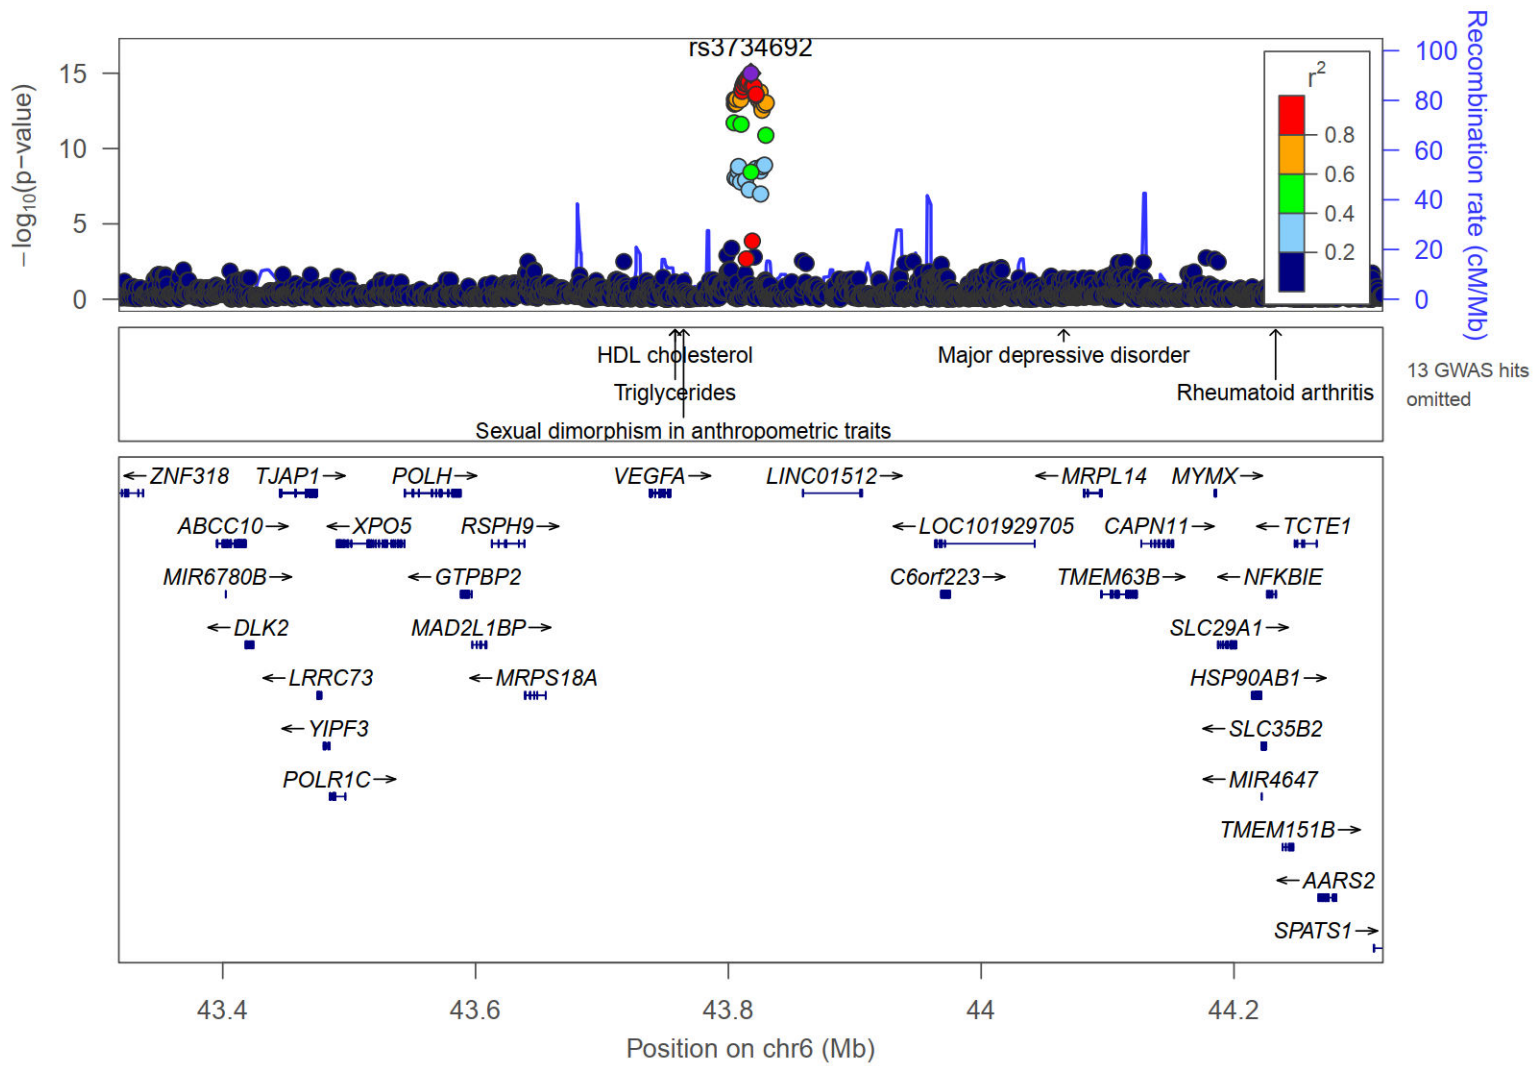

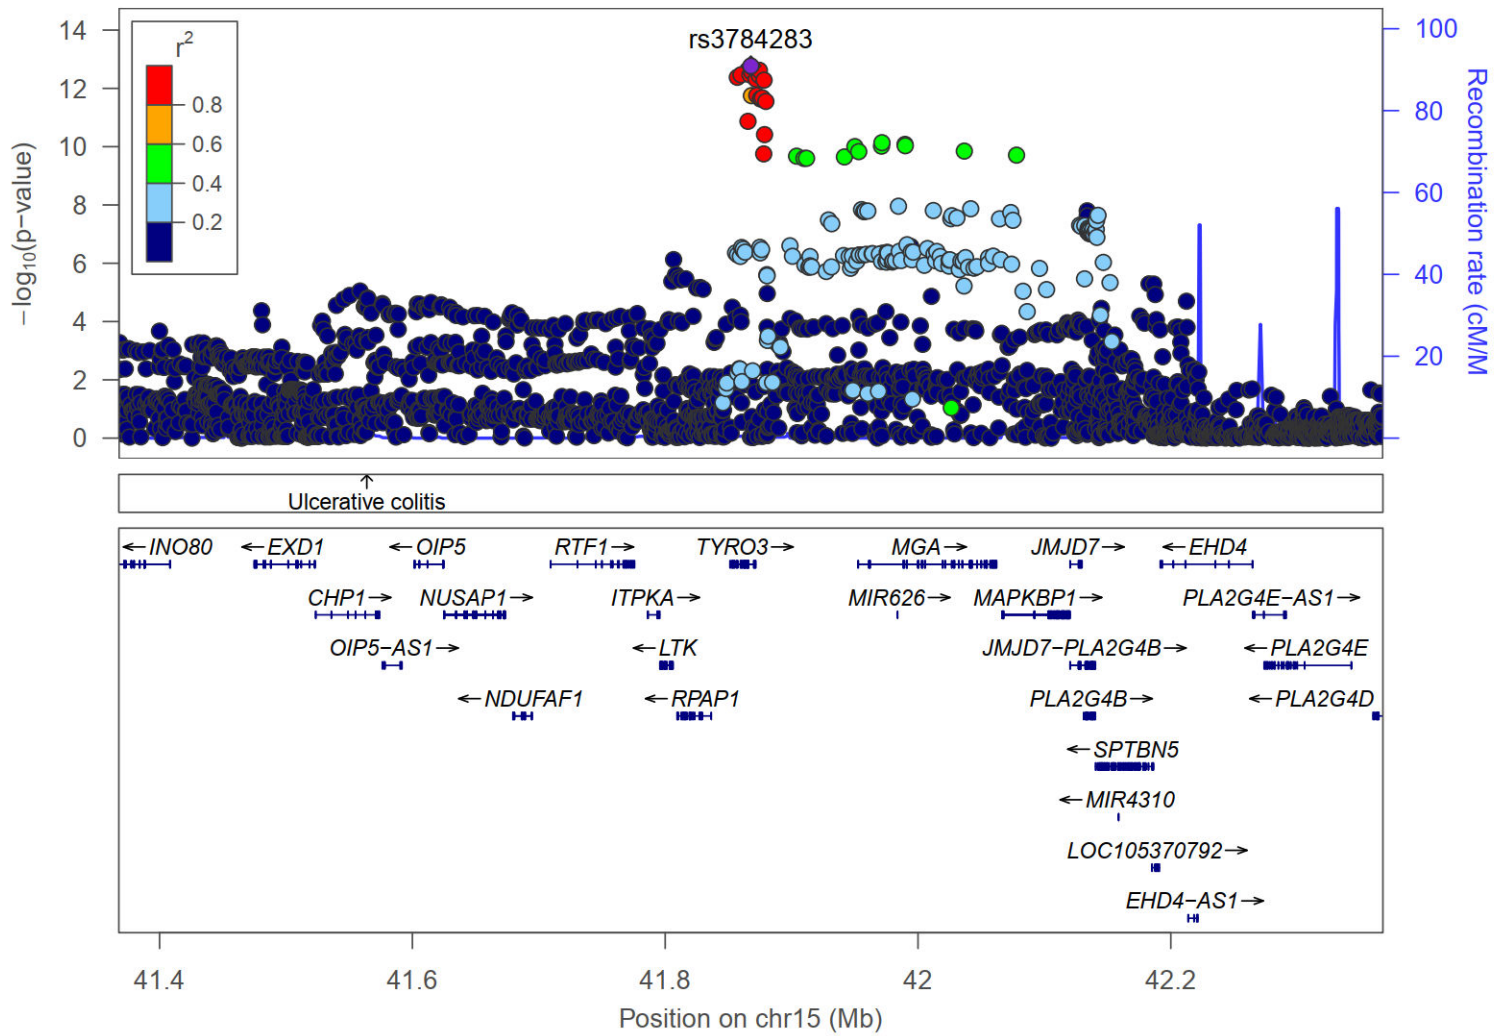

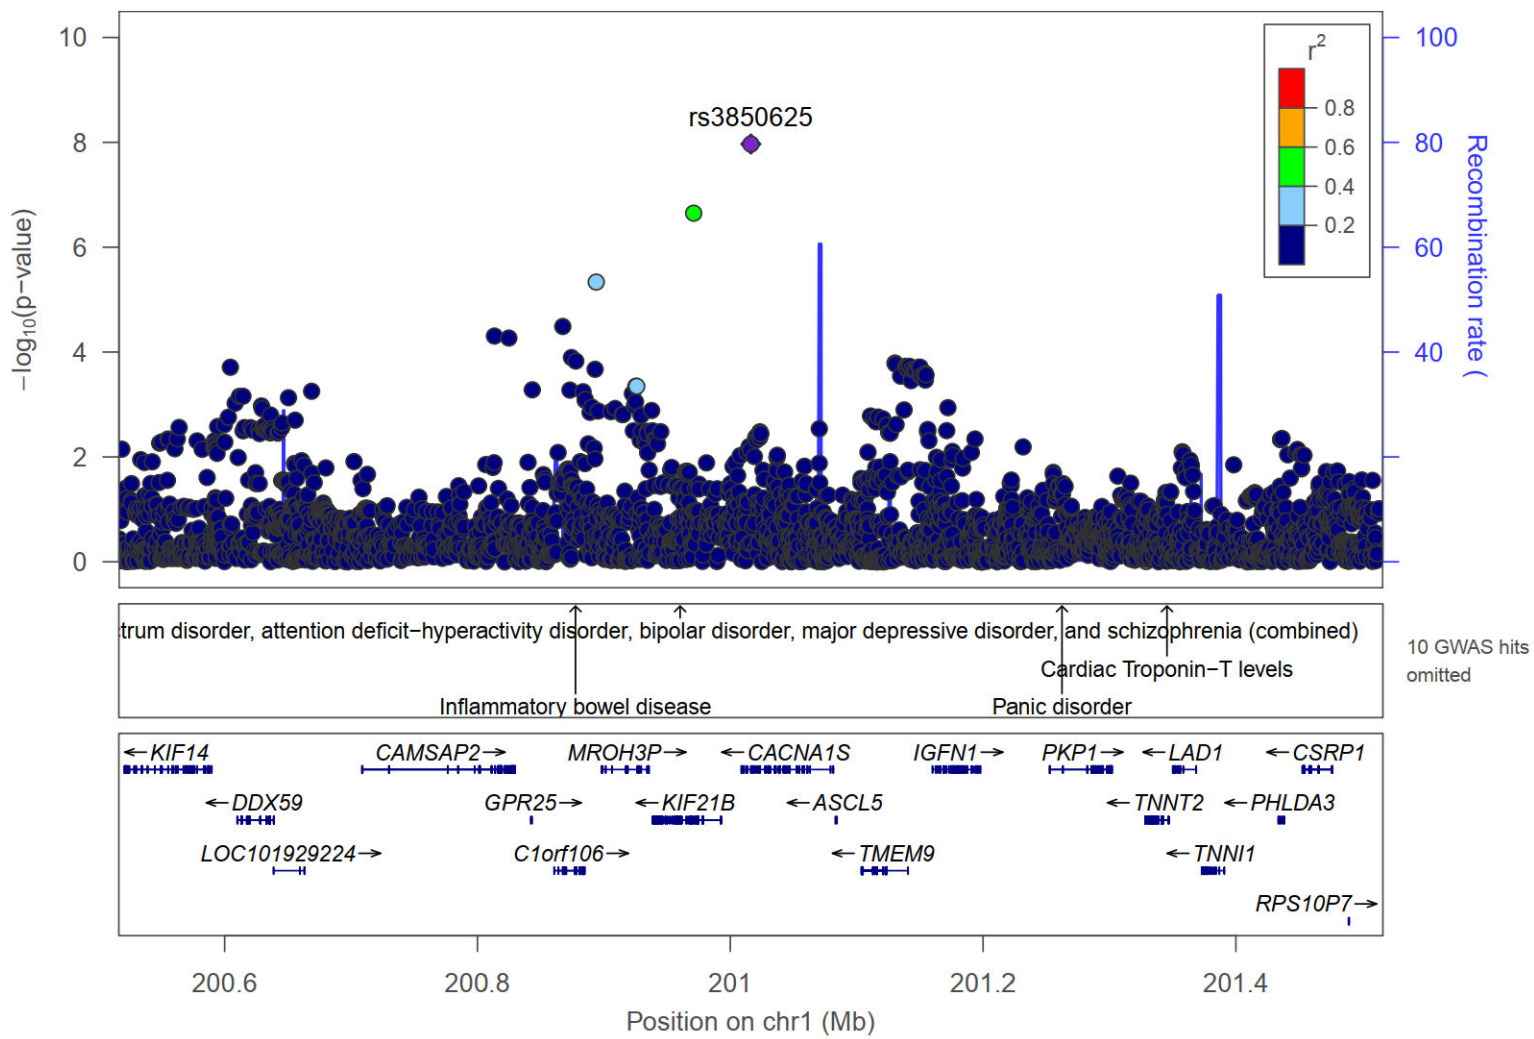

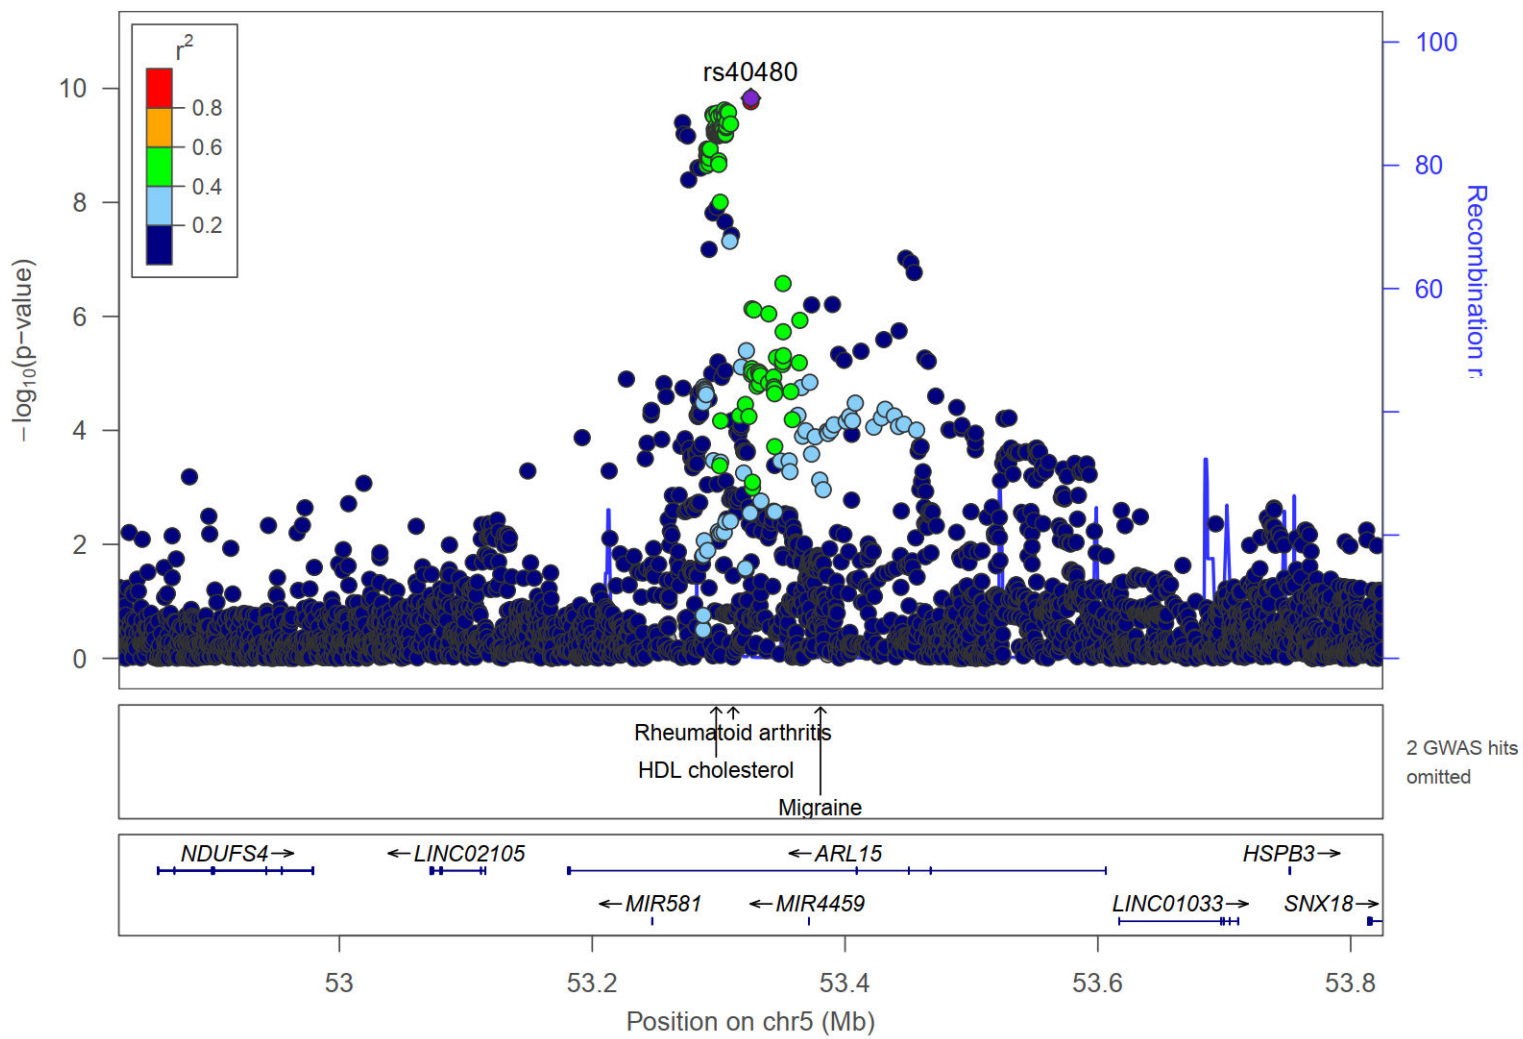



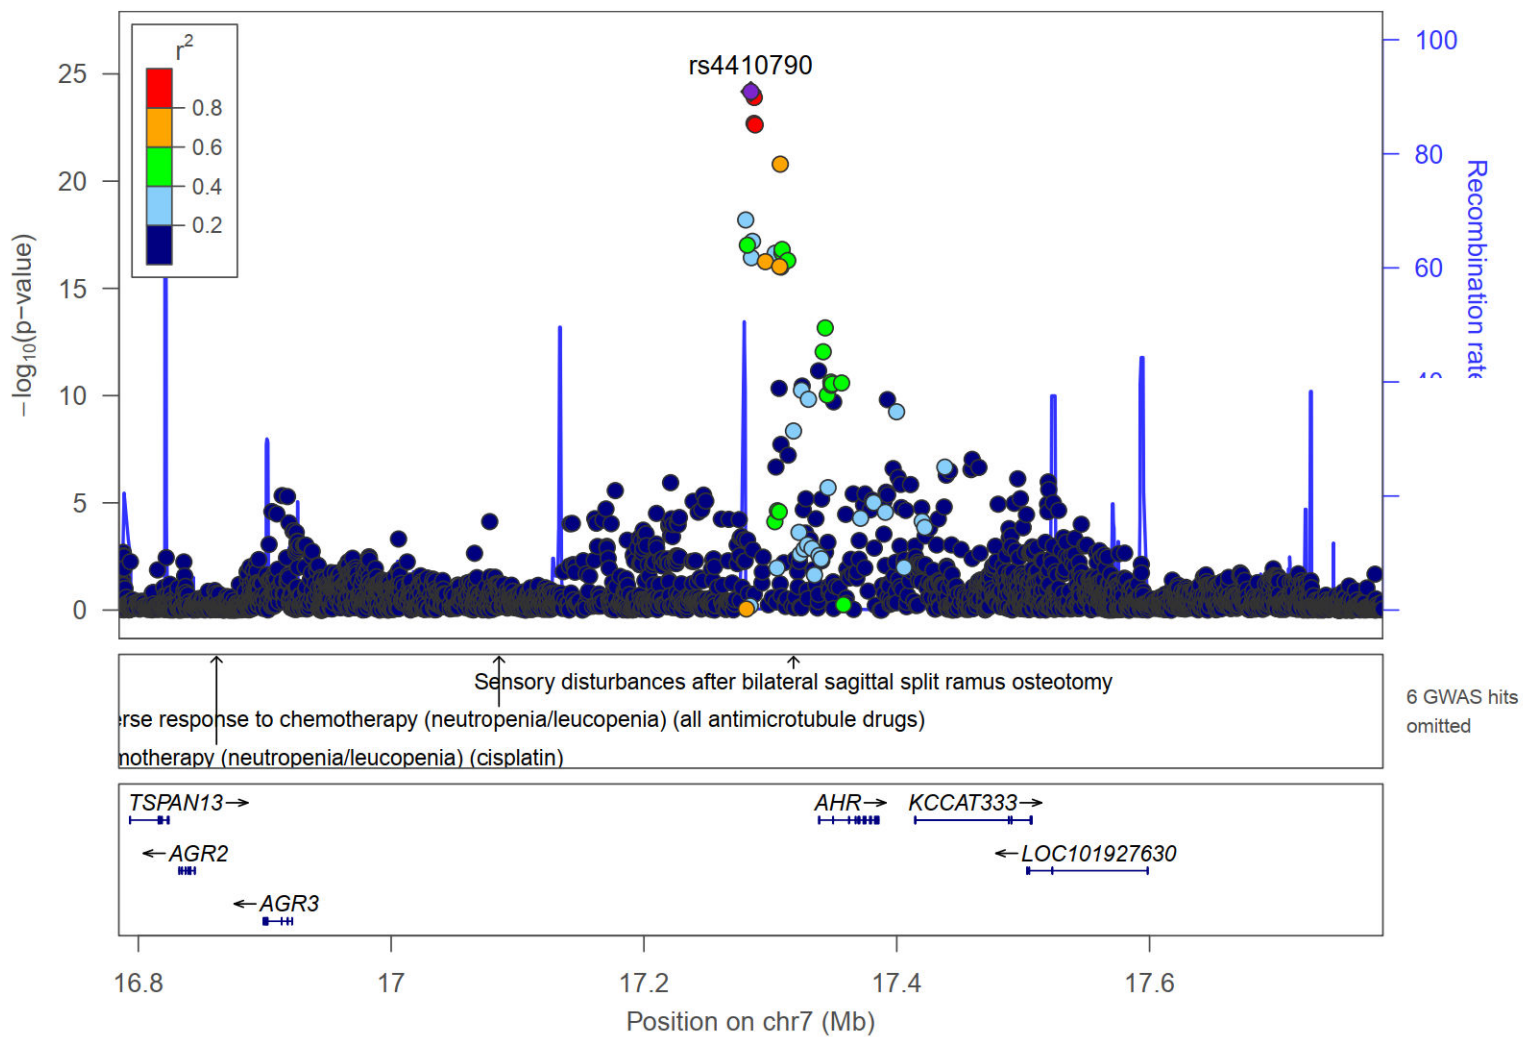

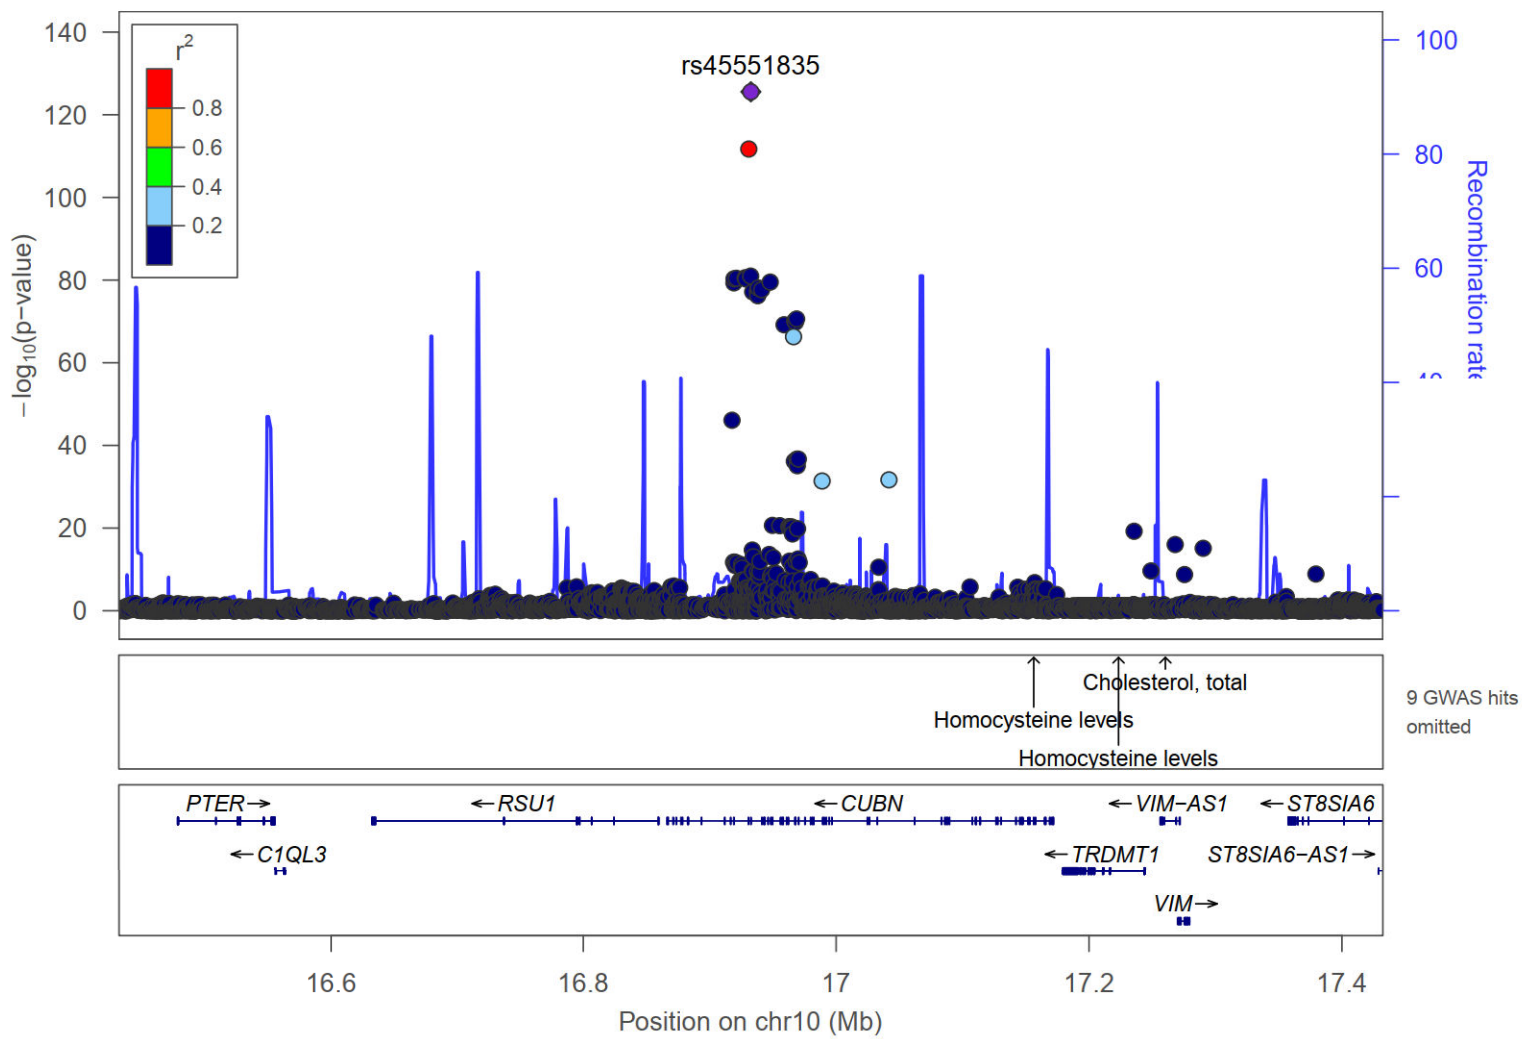



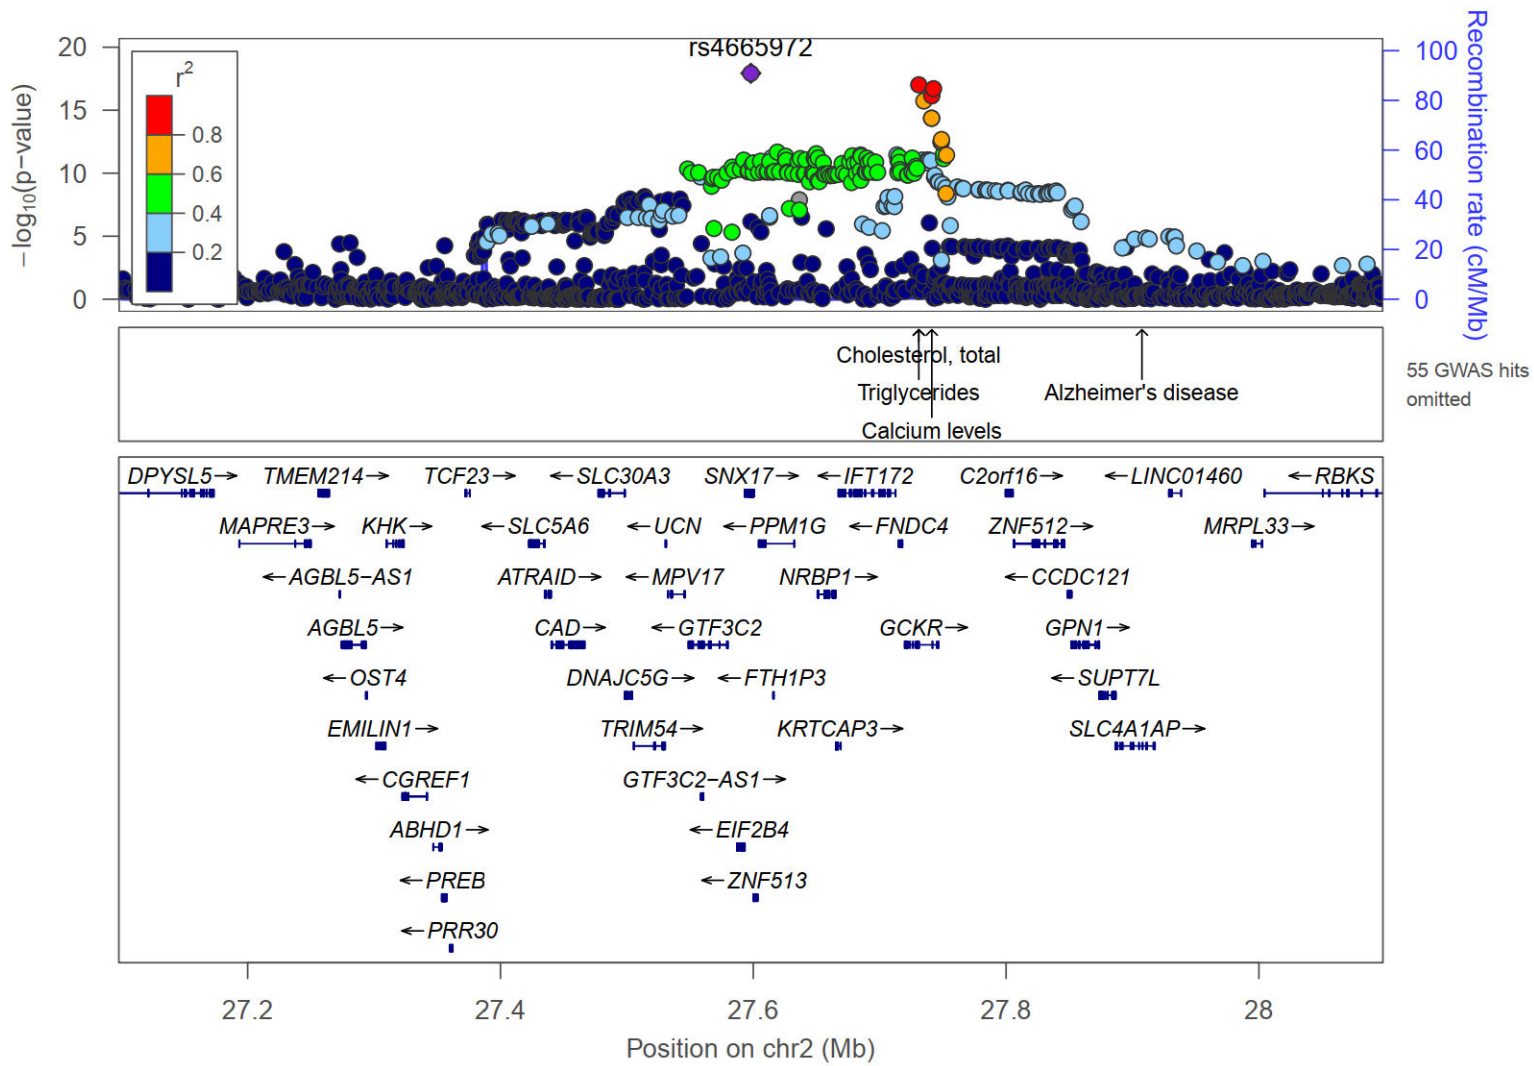

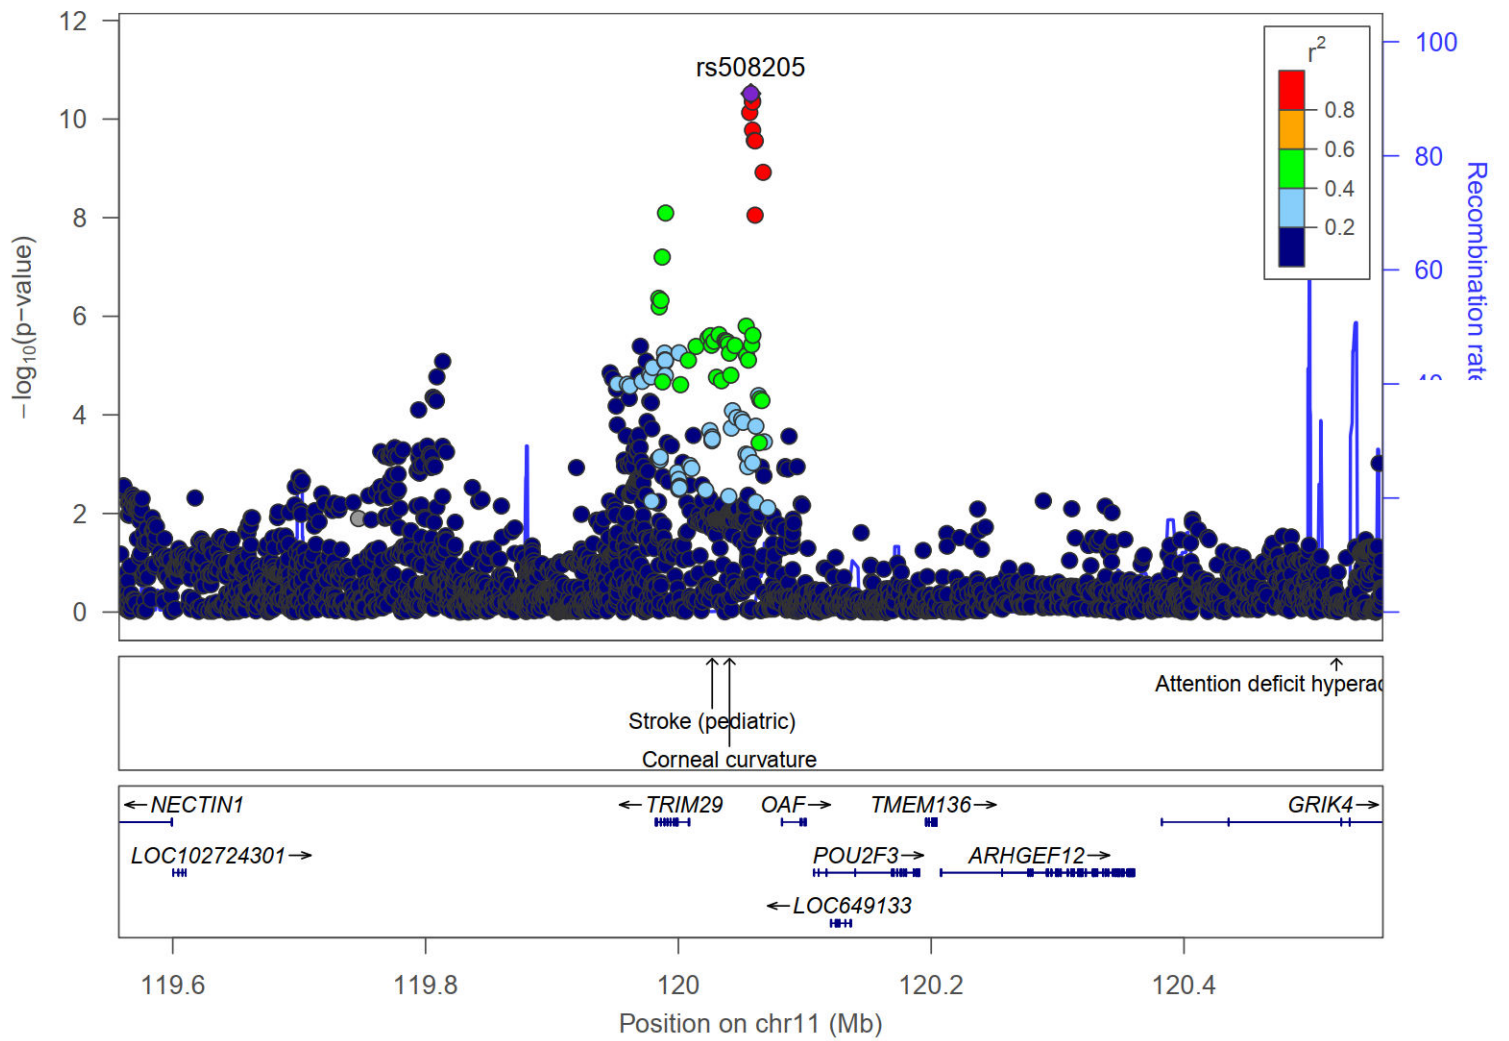

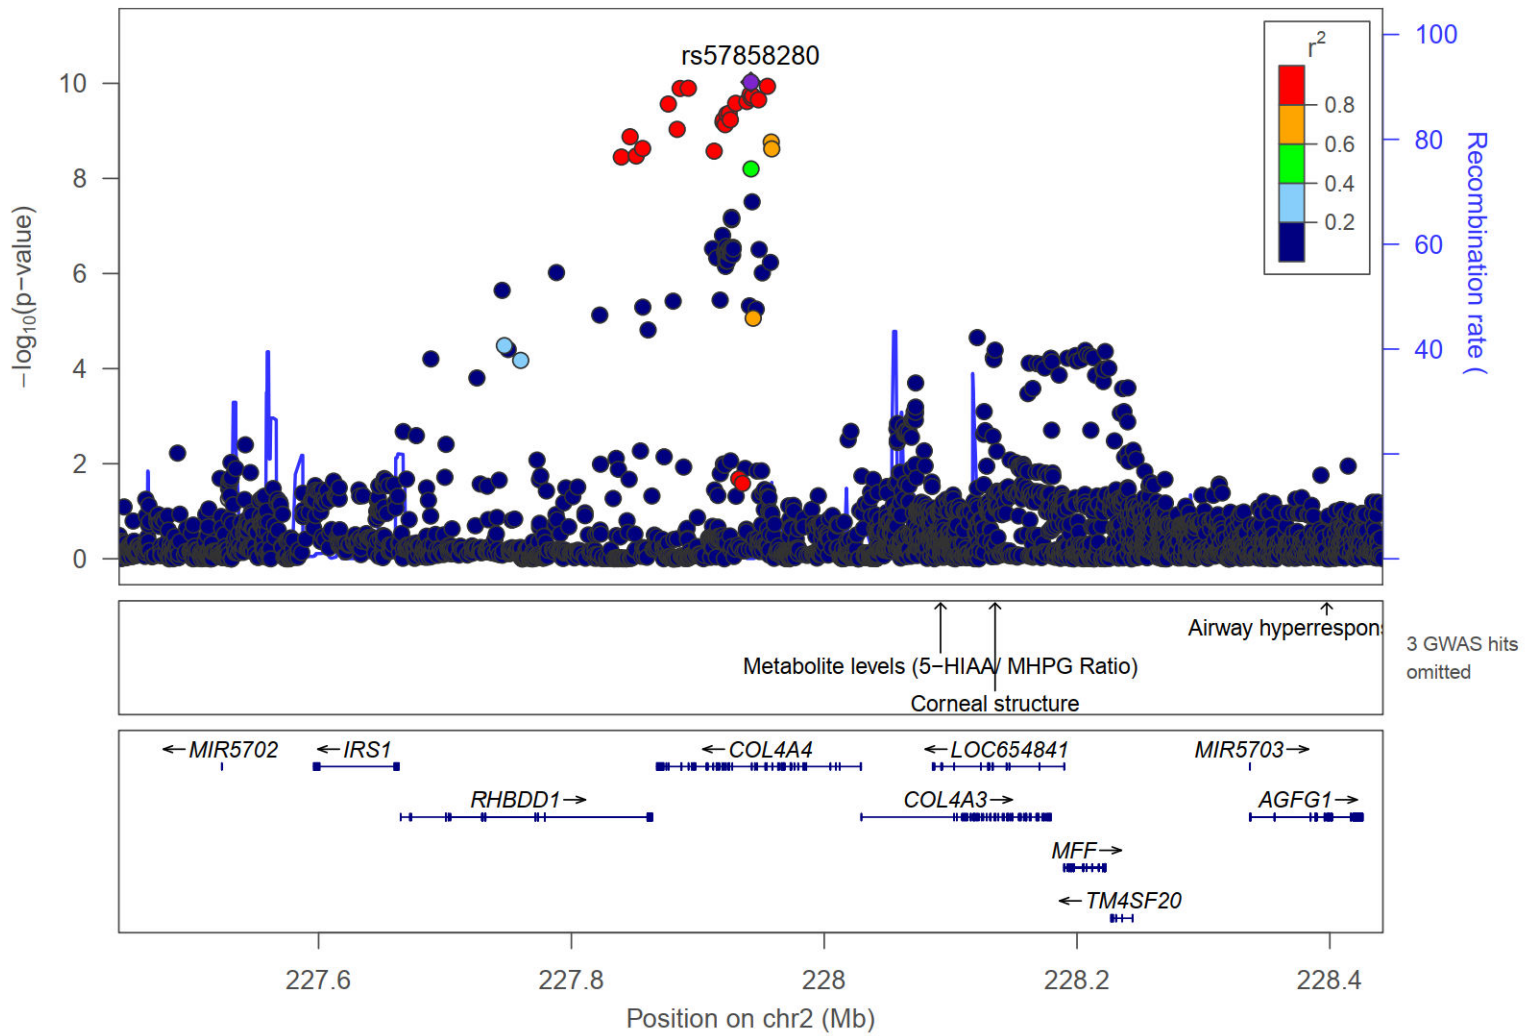

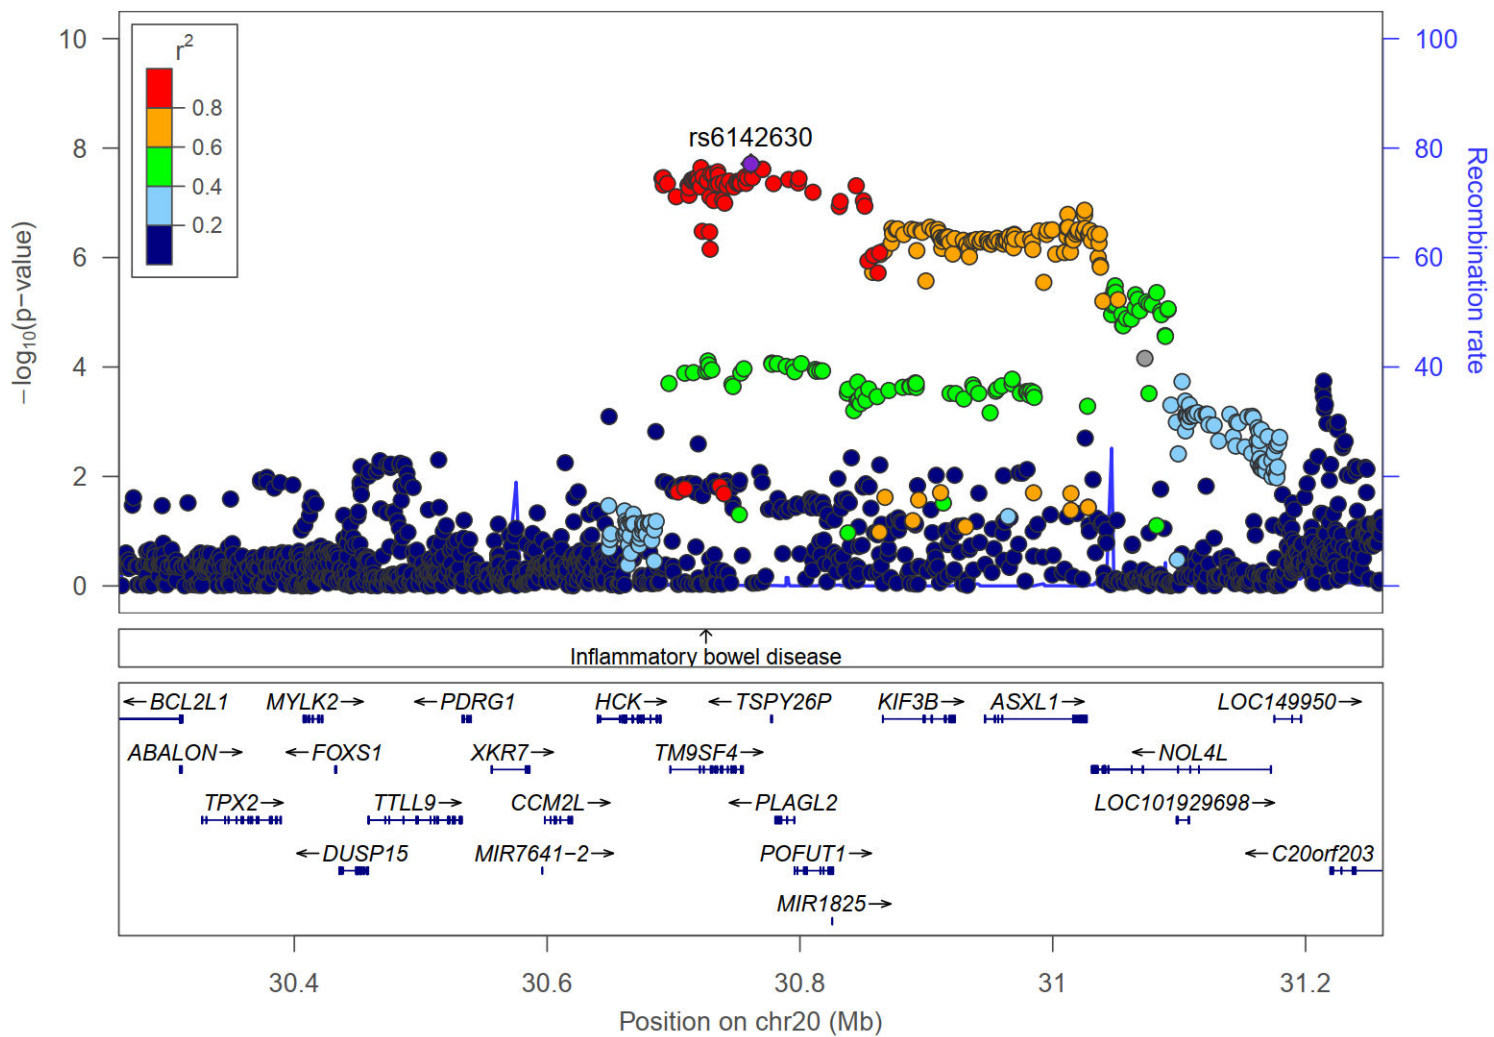

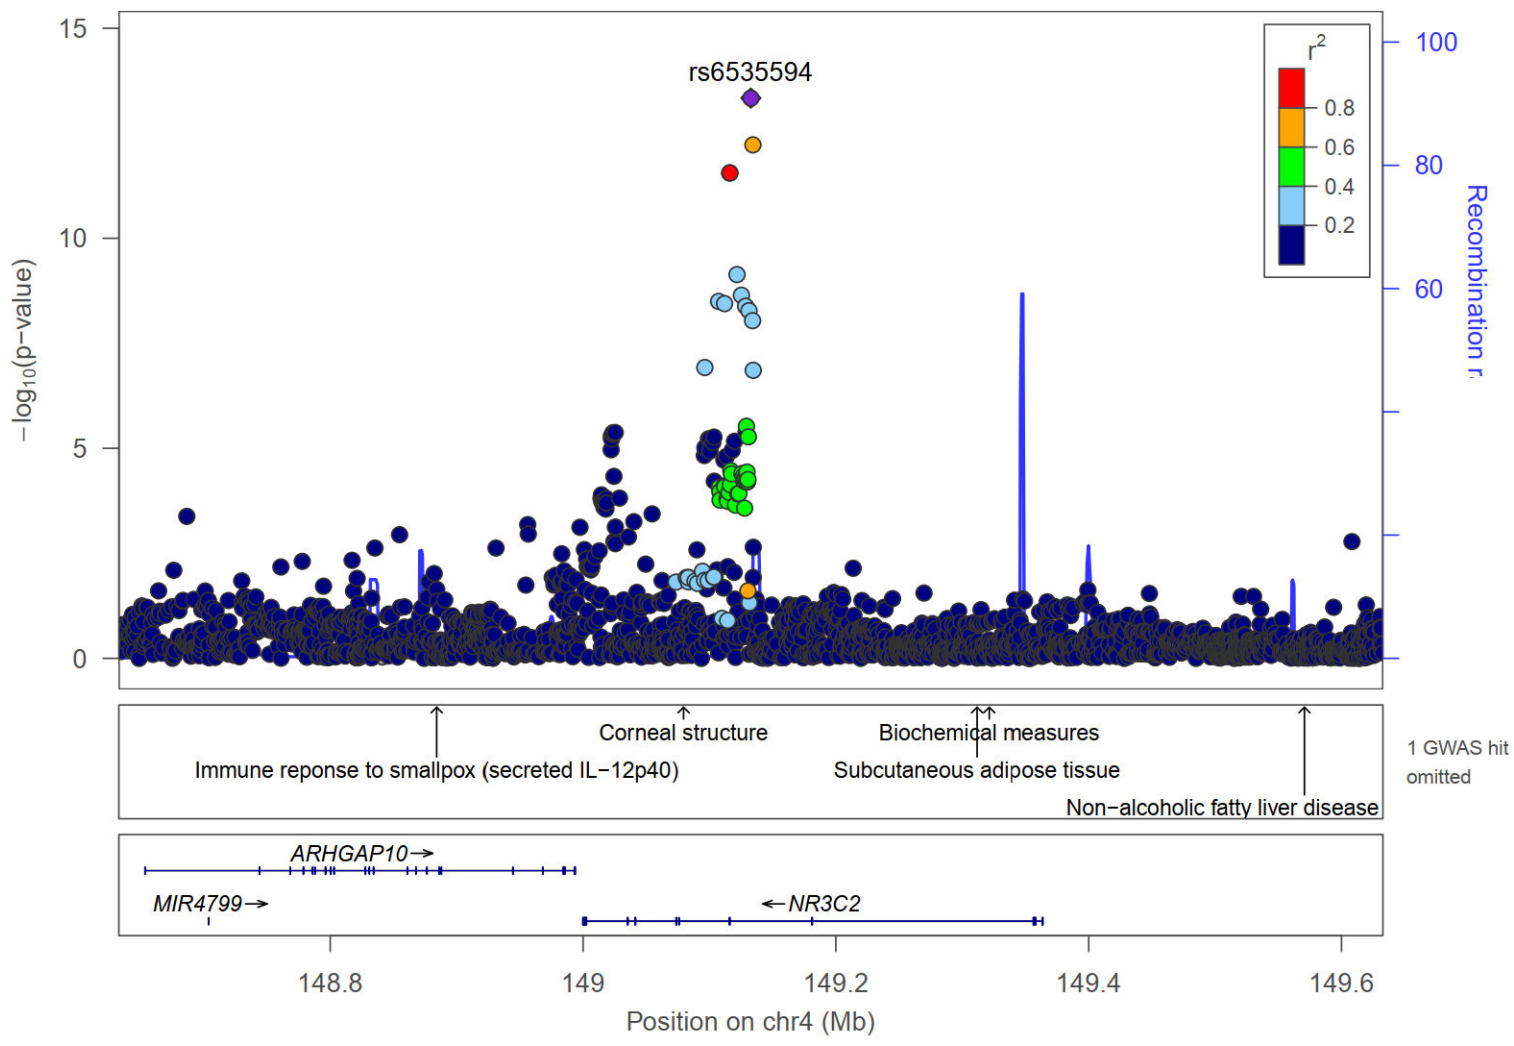

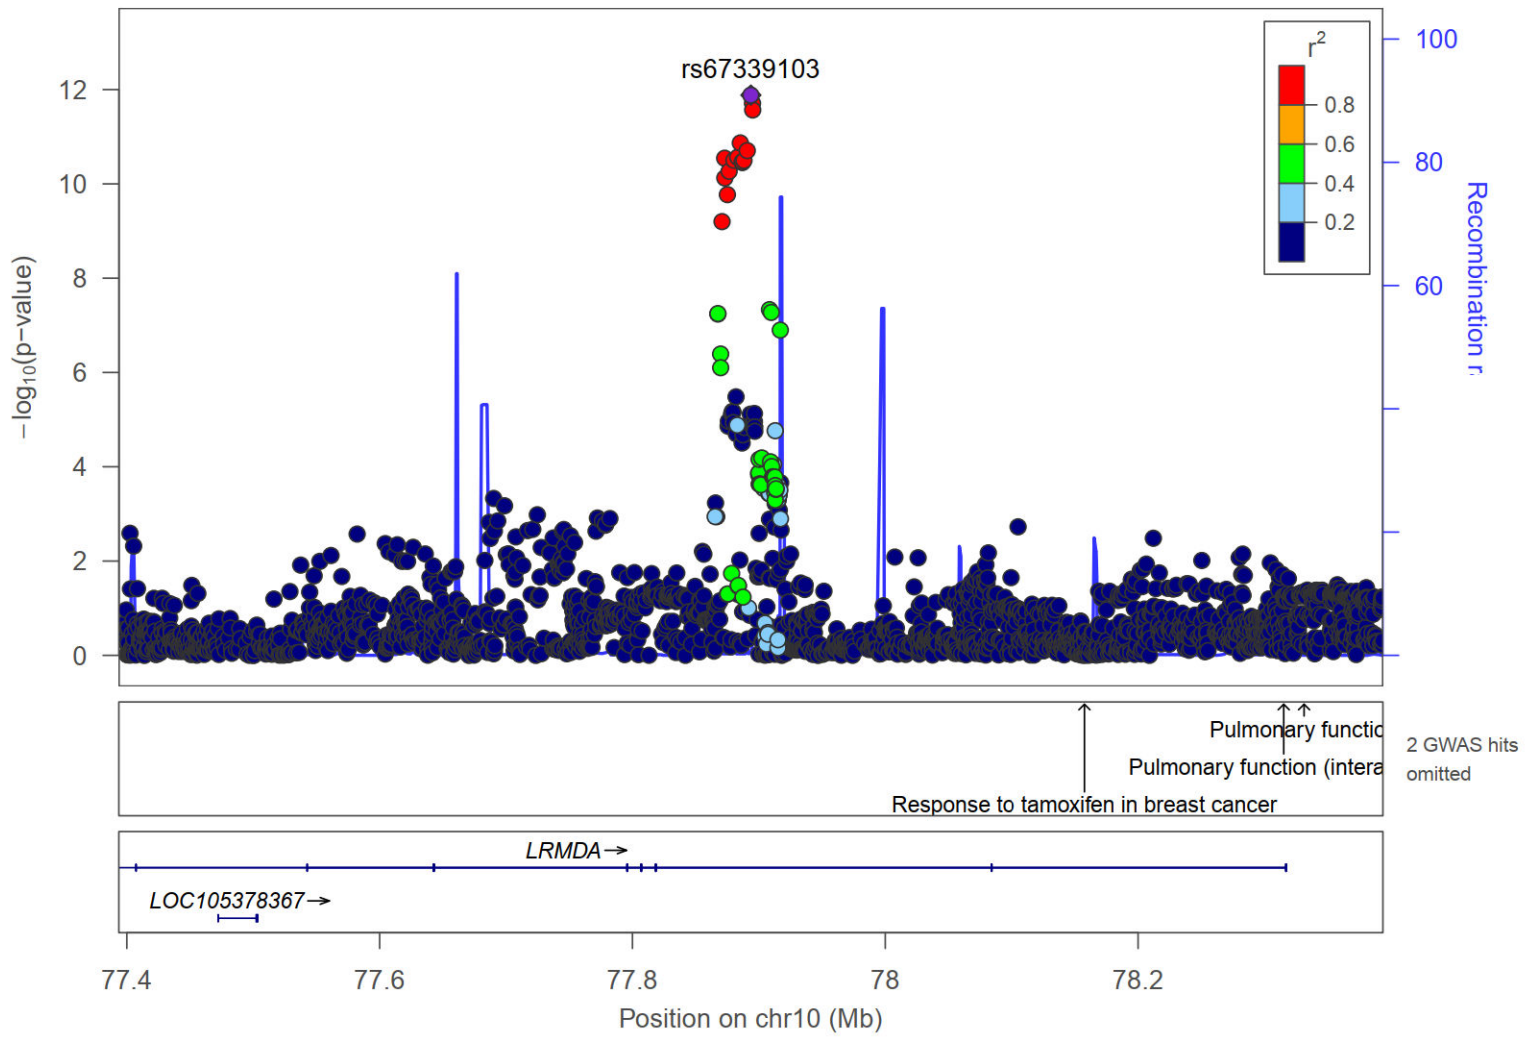



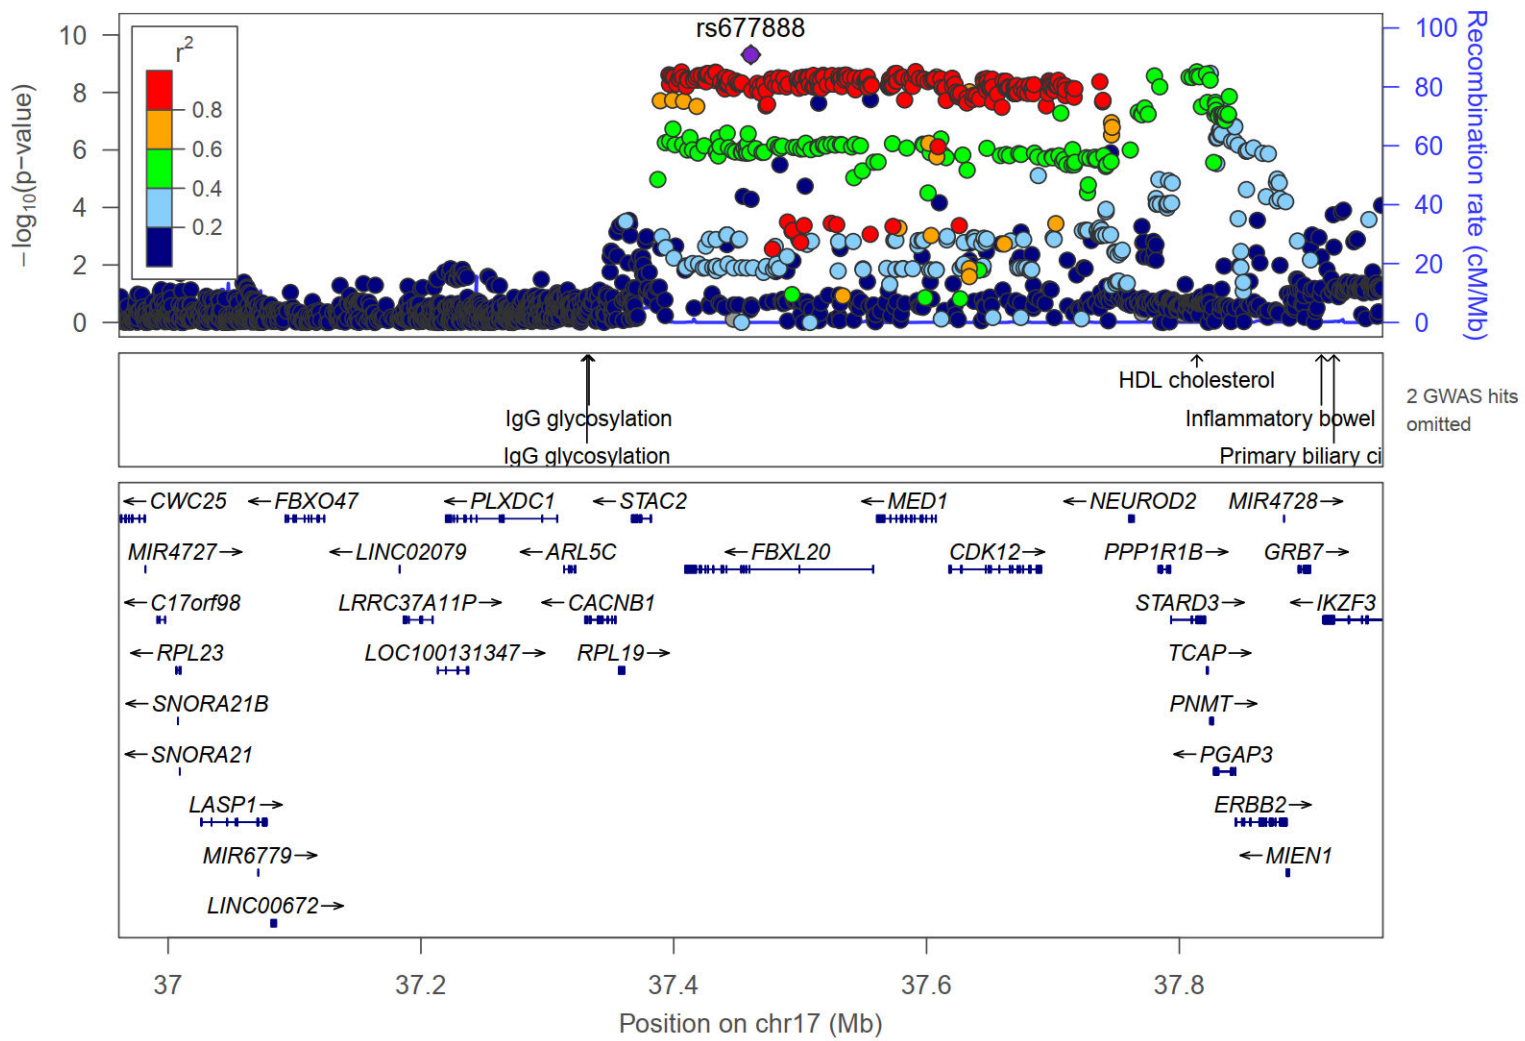

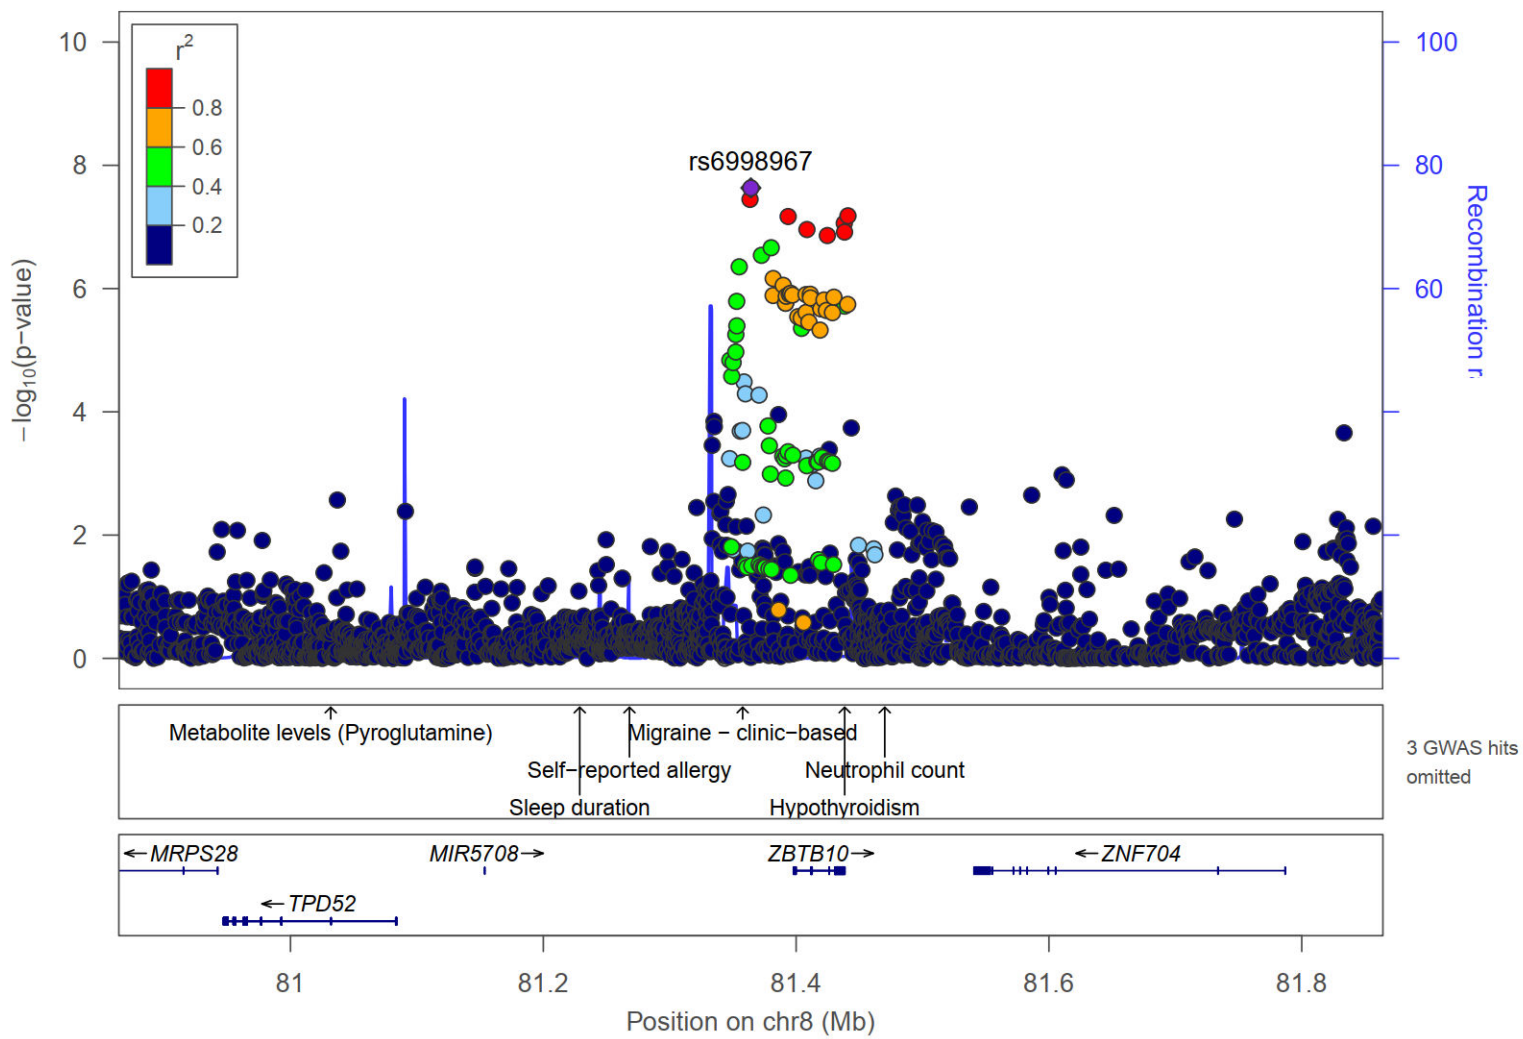



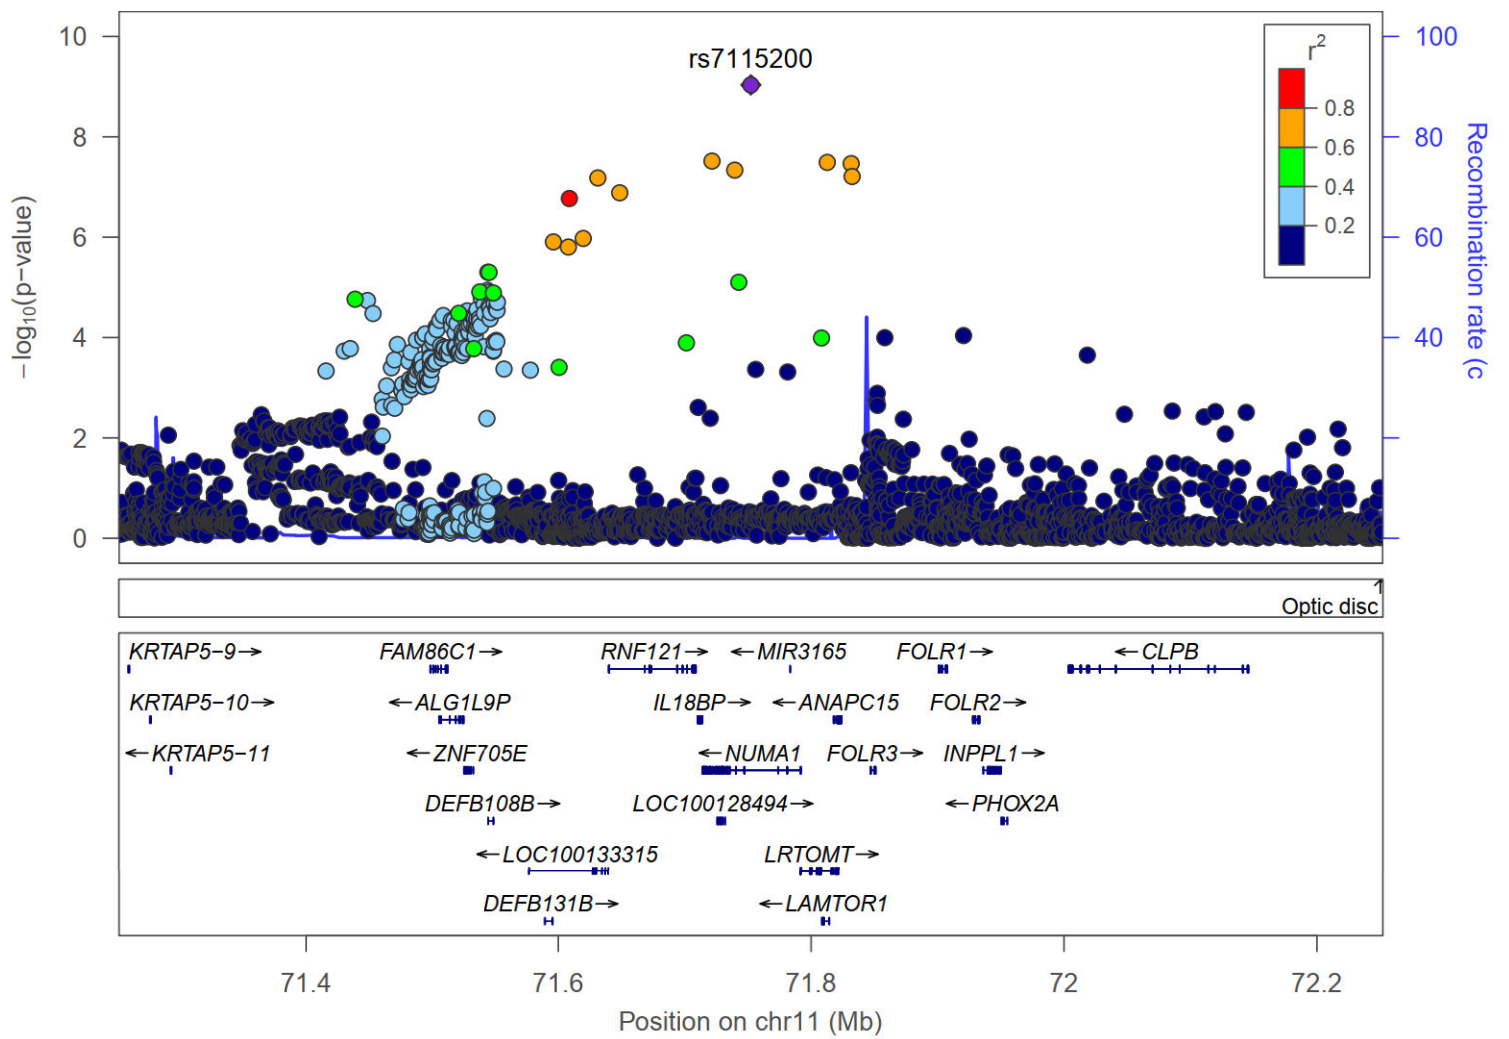

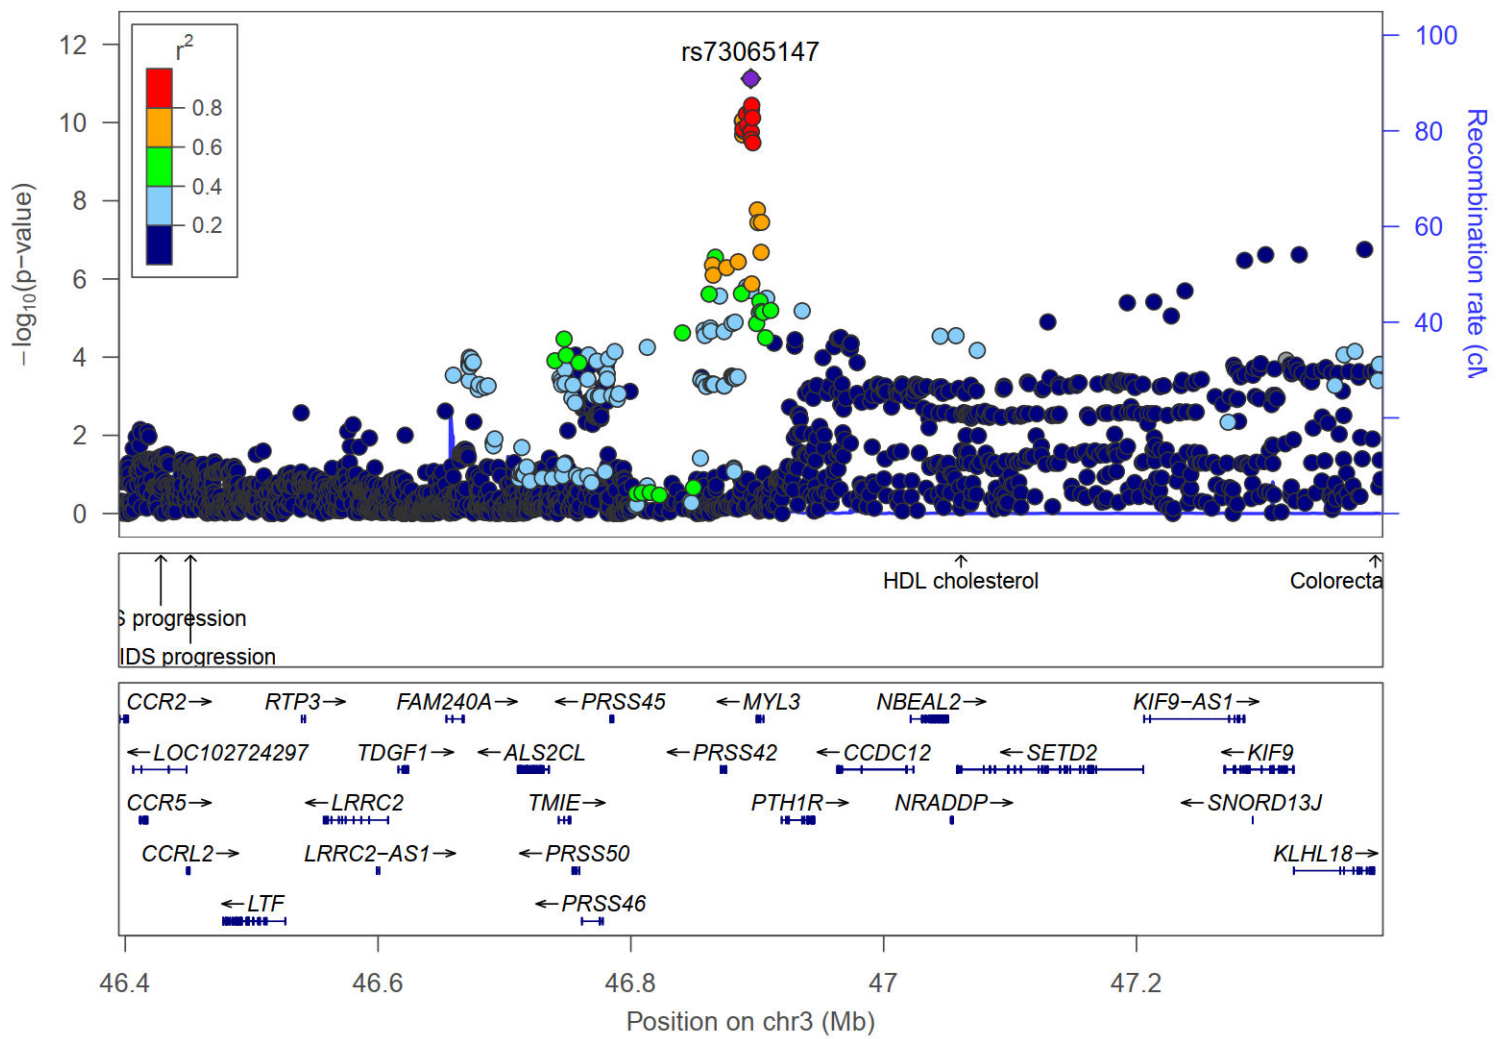

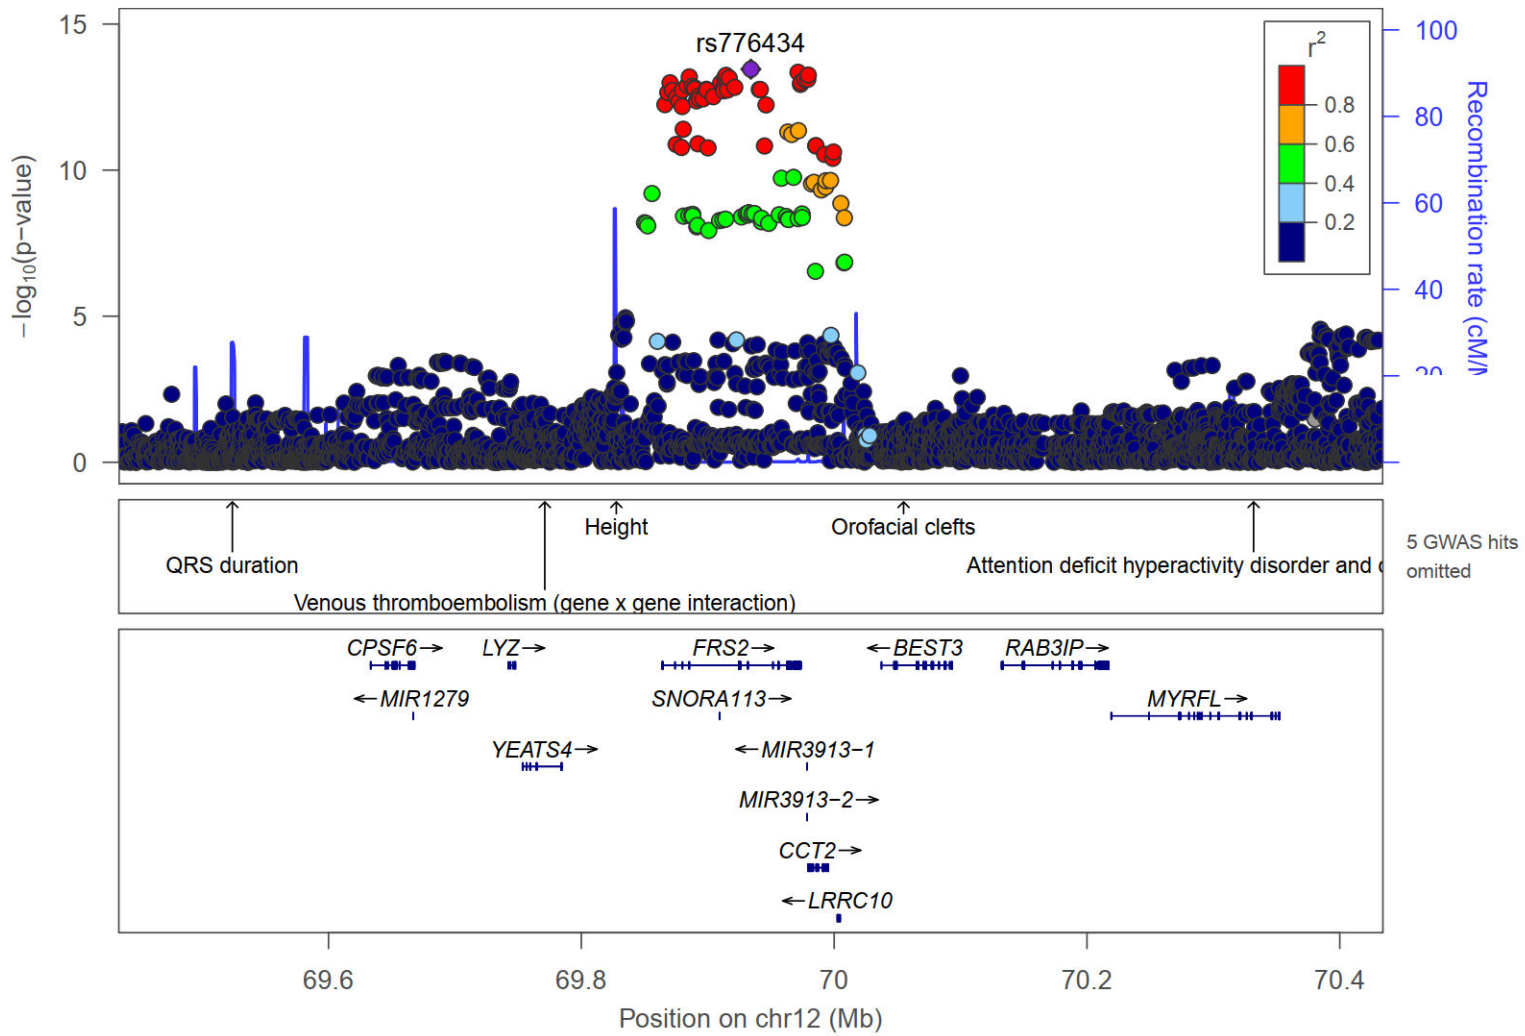

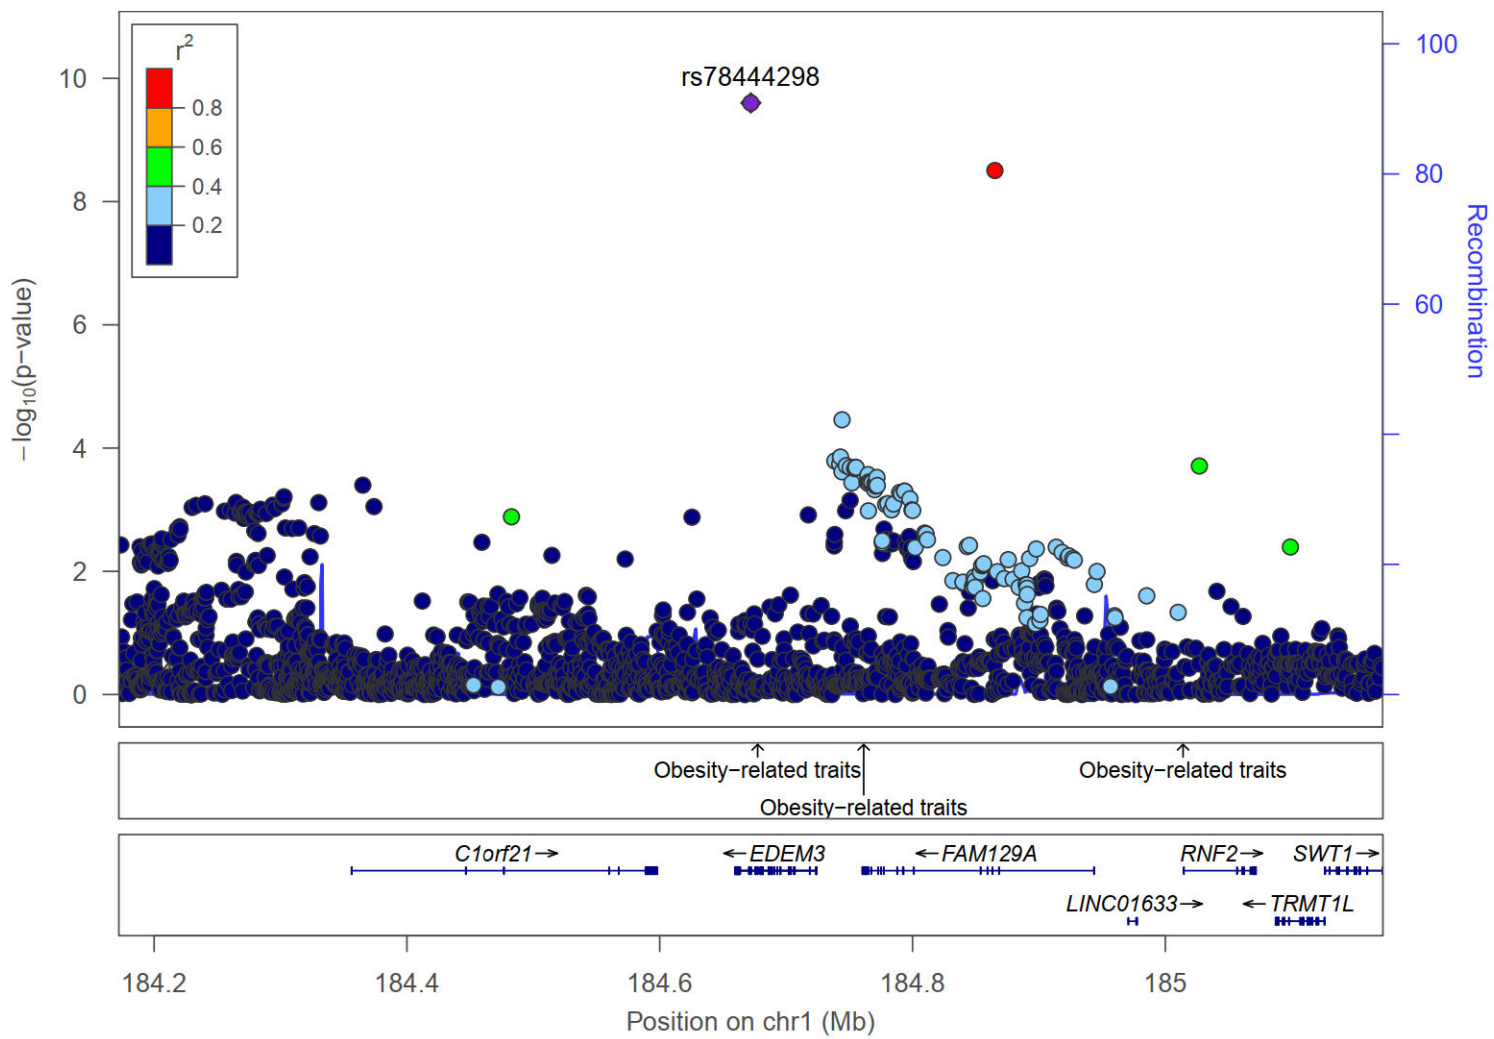

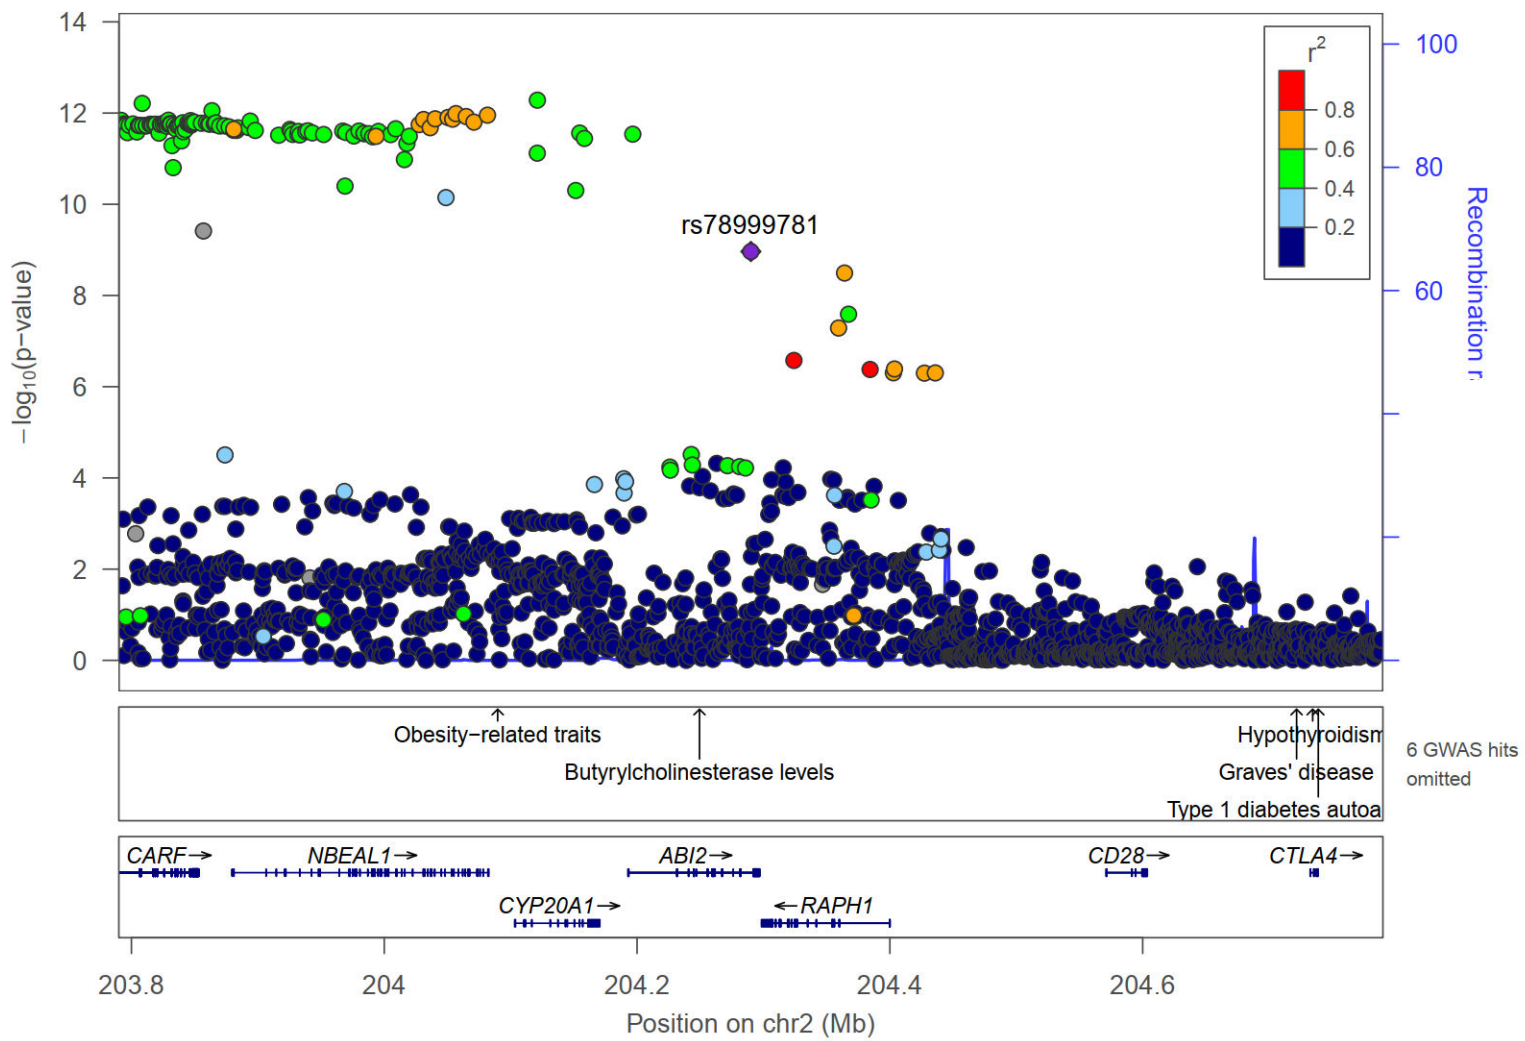

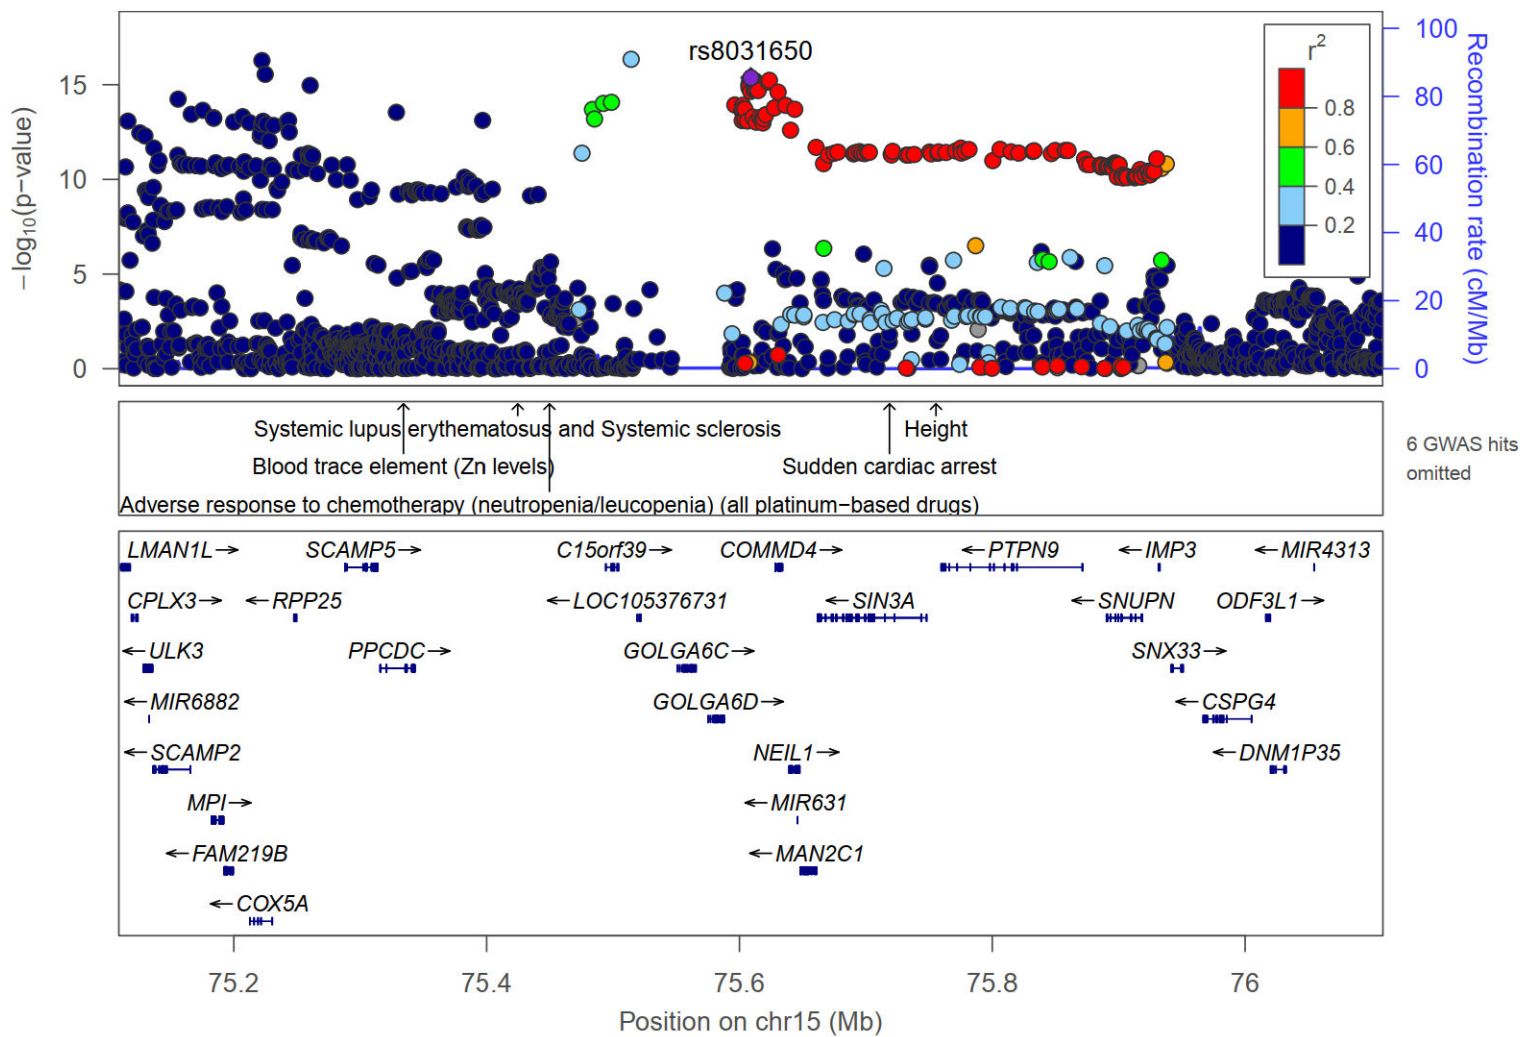



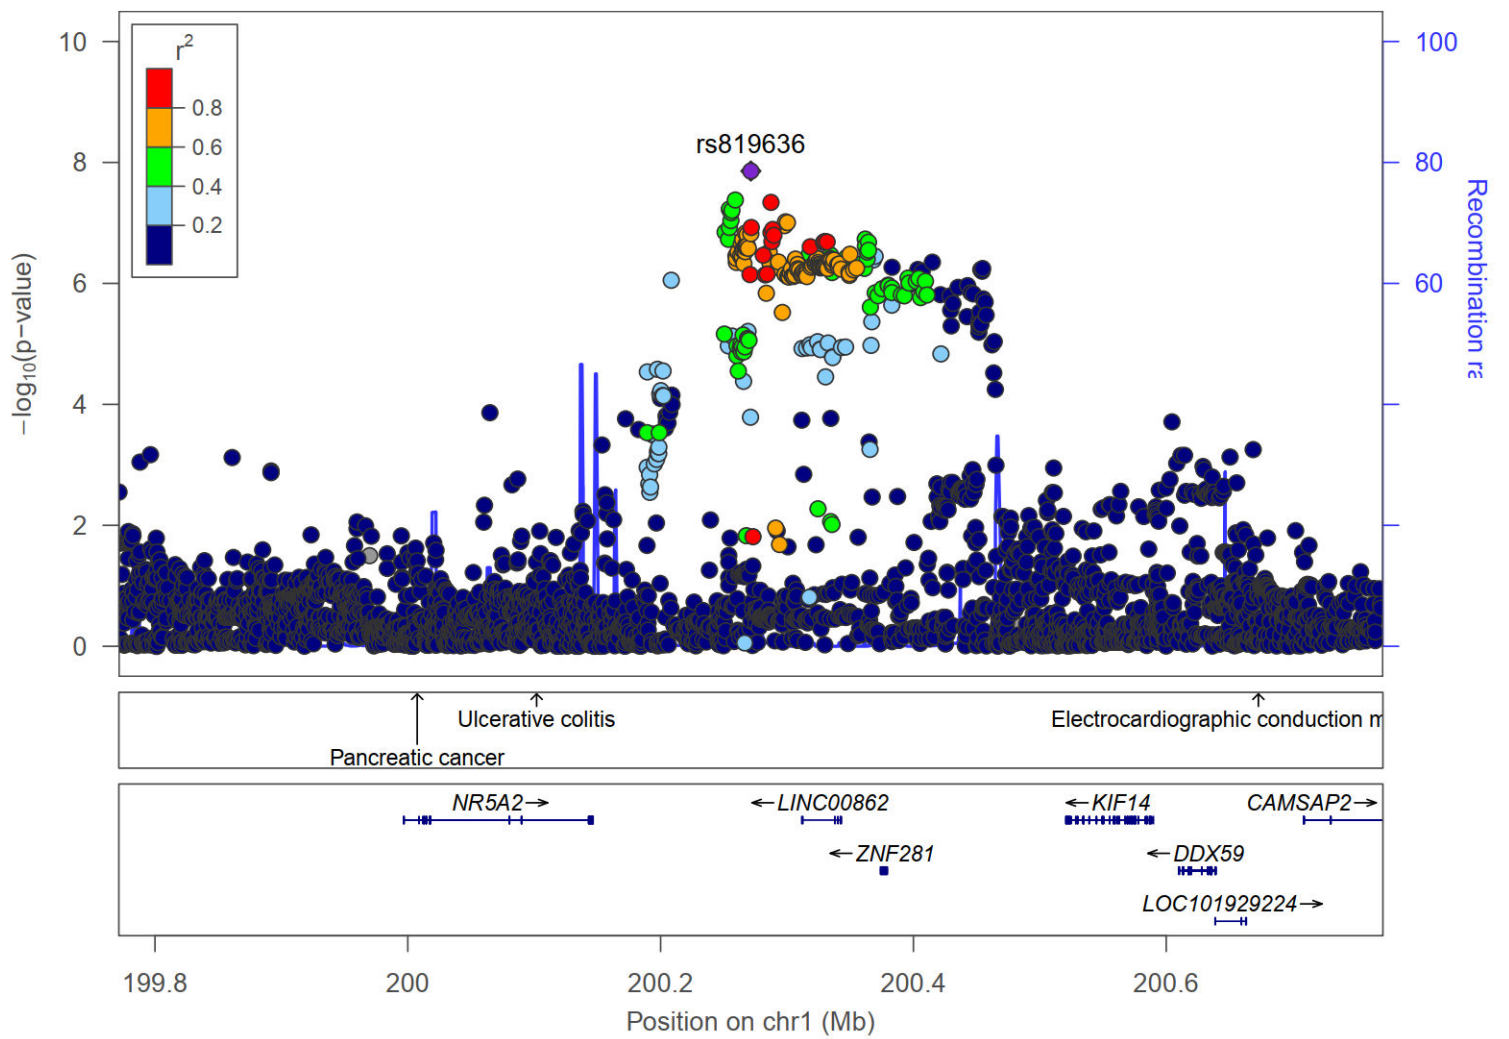



Regional association plots are shown for all genome-wide significant index SNPs. The dots are plotted on the y-axis according to their meta-analysis association p-value, and colored according to their correlation  $r^2$  with the index SNP estimated based on the 1000 Genomes EUR reference samples (gray for missing data). Plots were generated using the stand-alone version 1.3 of LocusZoom<sup>2</sup>. Genetic positions refer to GRCh37/hg19 coordinates.

**Supplementary Figure 3: Expected number of discoveries at increasing GWAS discovery sample sizes.**

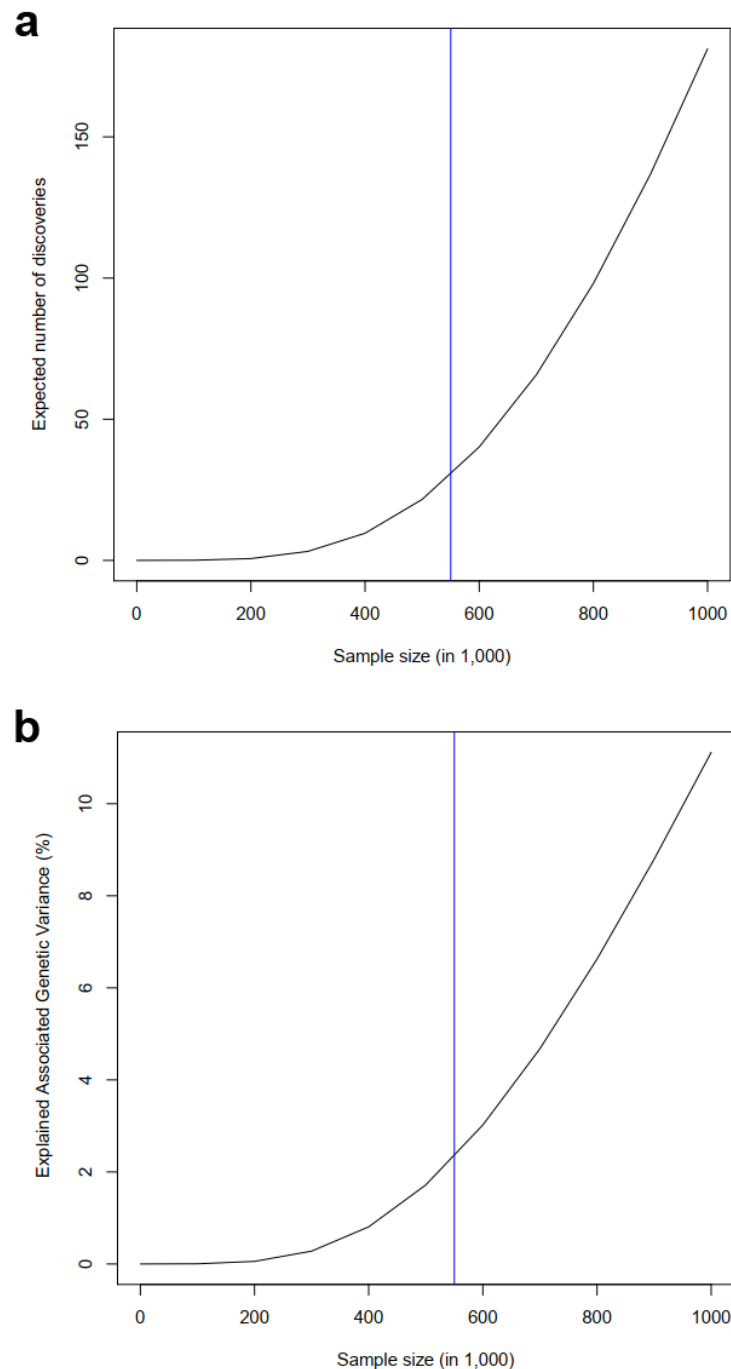

The panels show the estimate the number of expected discoveries (a) and the corresponding percentage of GWAS heritability explained (b) with increases in sample size using the summary statistics of our UACR trans-ethnic meta-analysis as input. The vertical blue line marks the number of predicted discoveries for UACR at the current sample size and may represent an underestimate because of many SNPs with small effects.

**Supplementary Figure 4: Regional association plots for loci identified in trans-ethnic GWAS meta-analysis of UACR among individuals with diabetes**

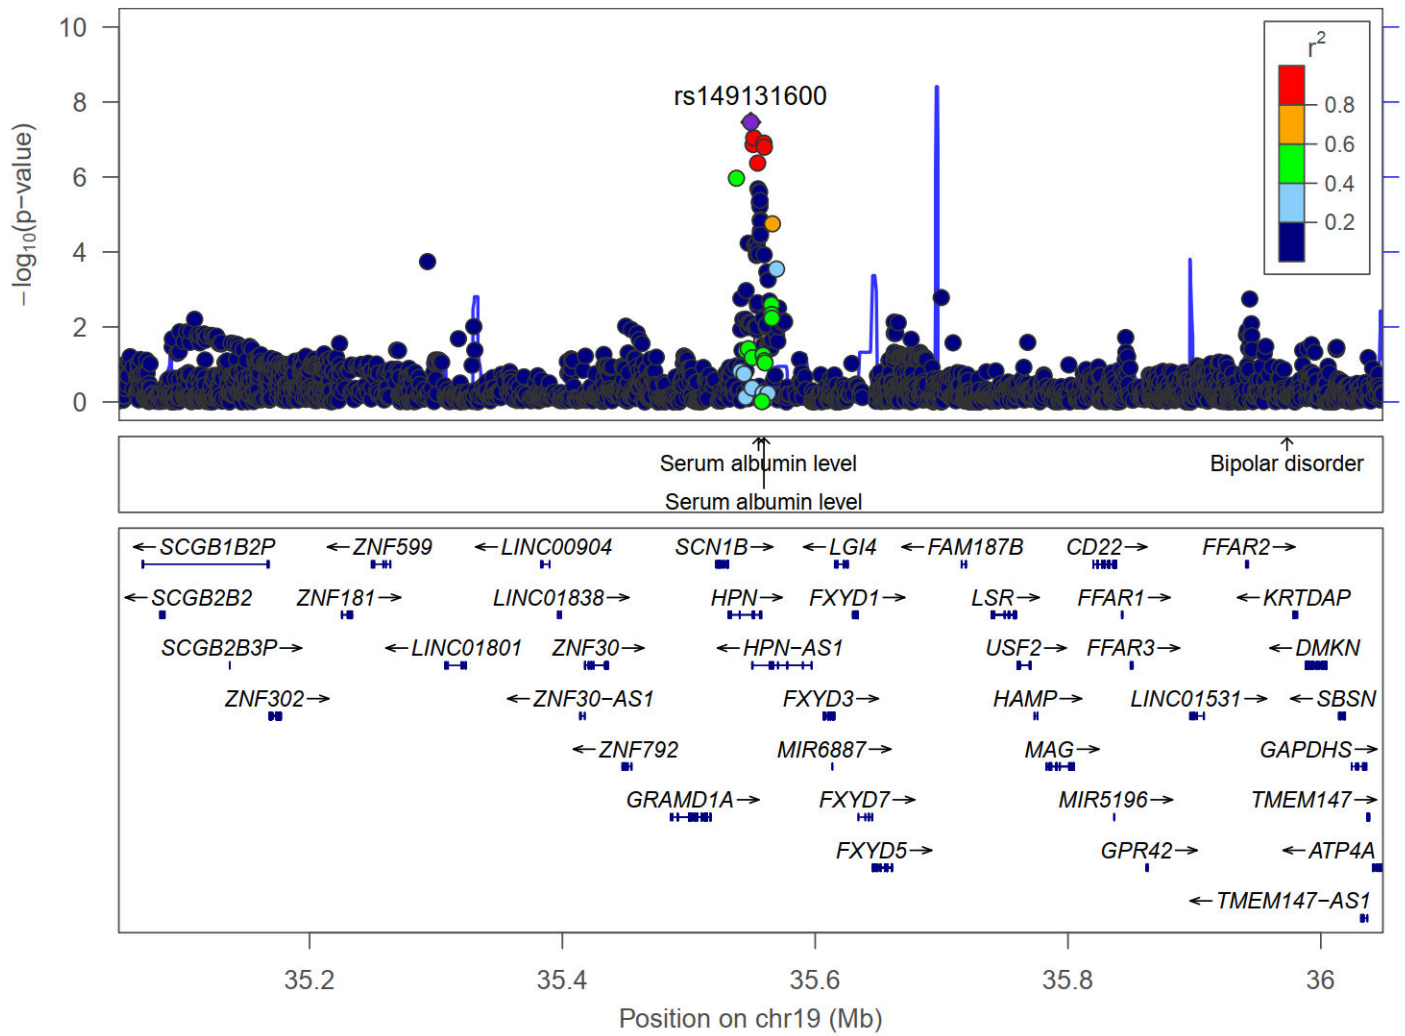

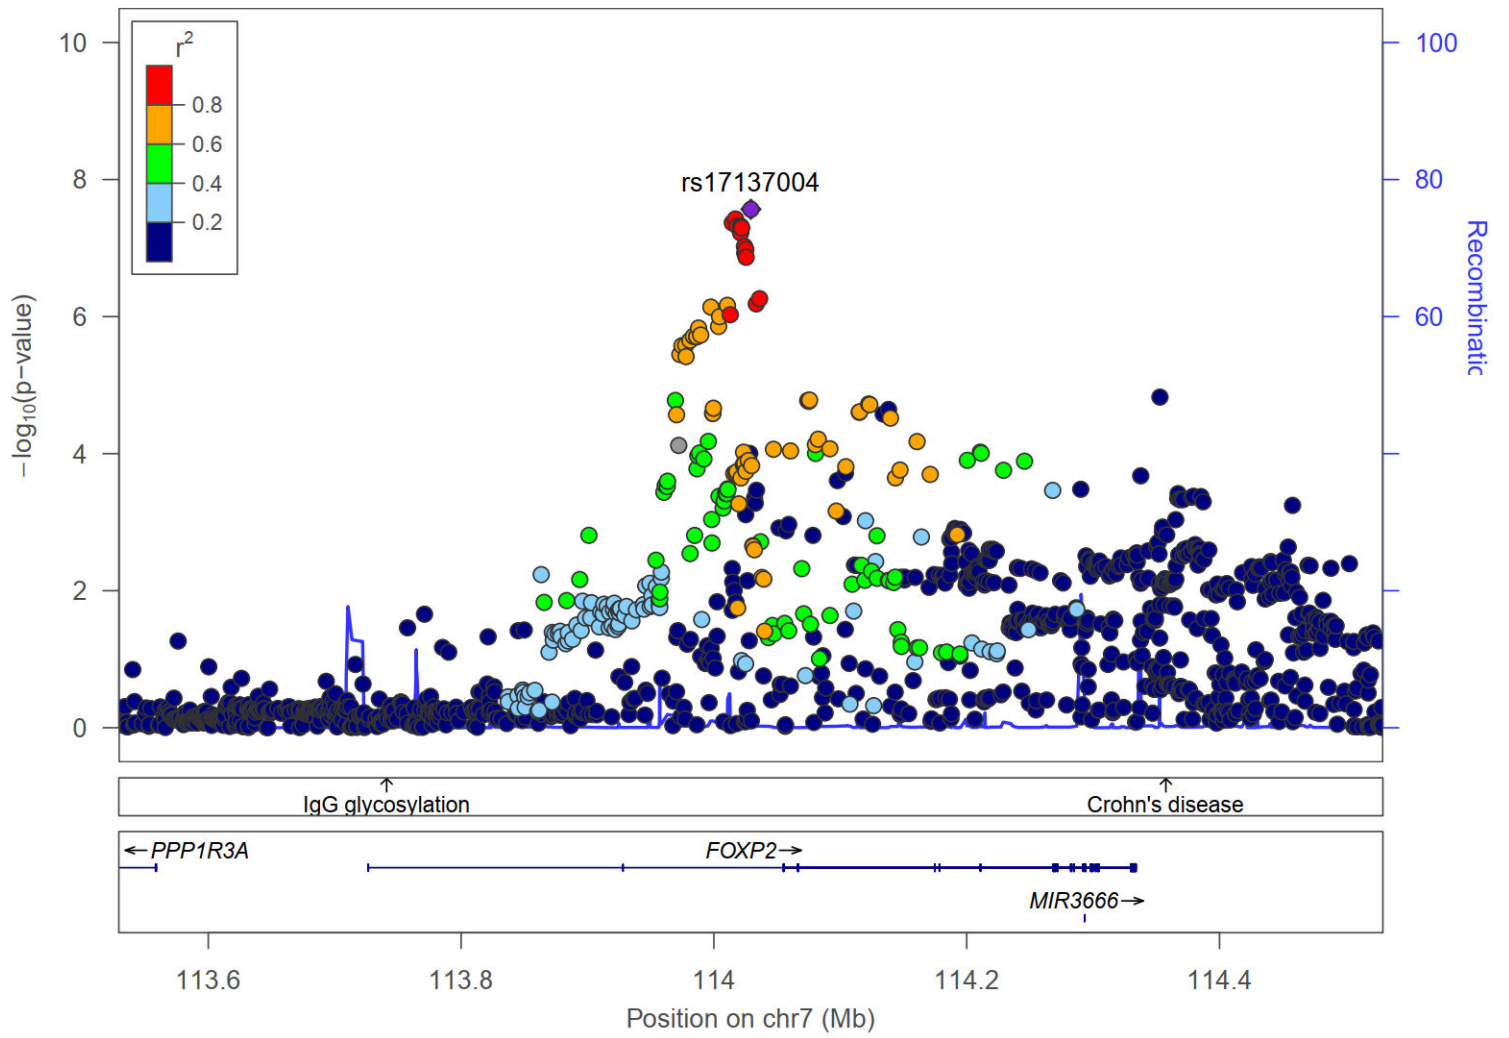

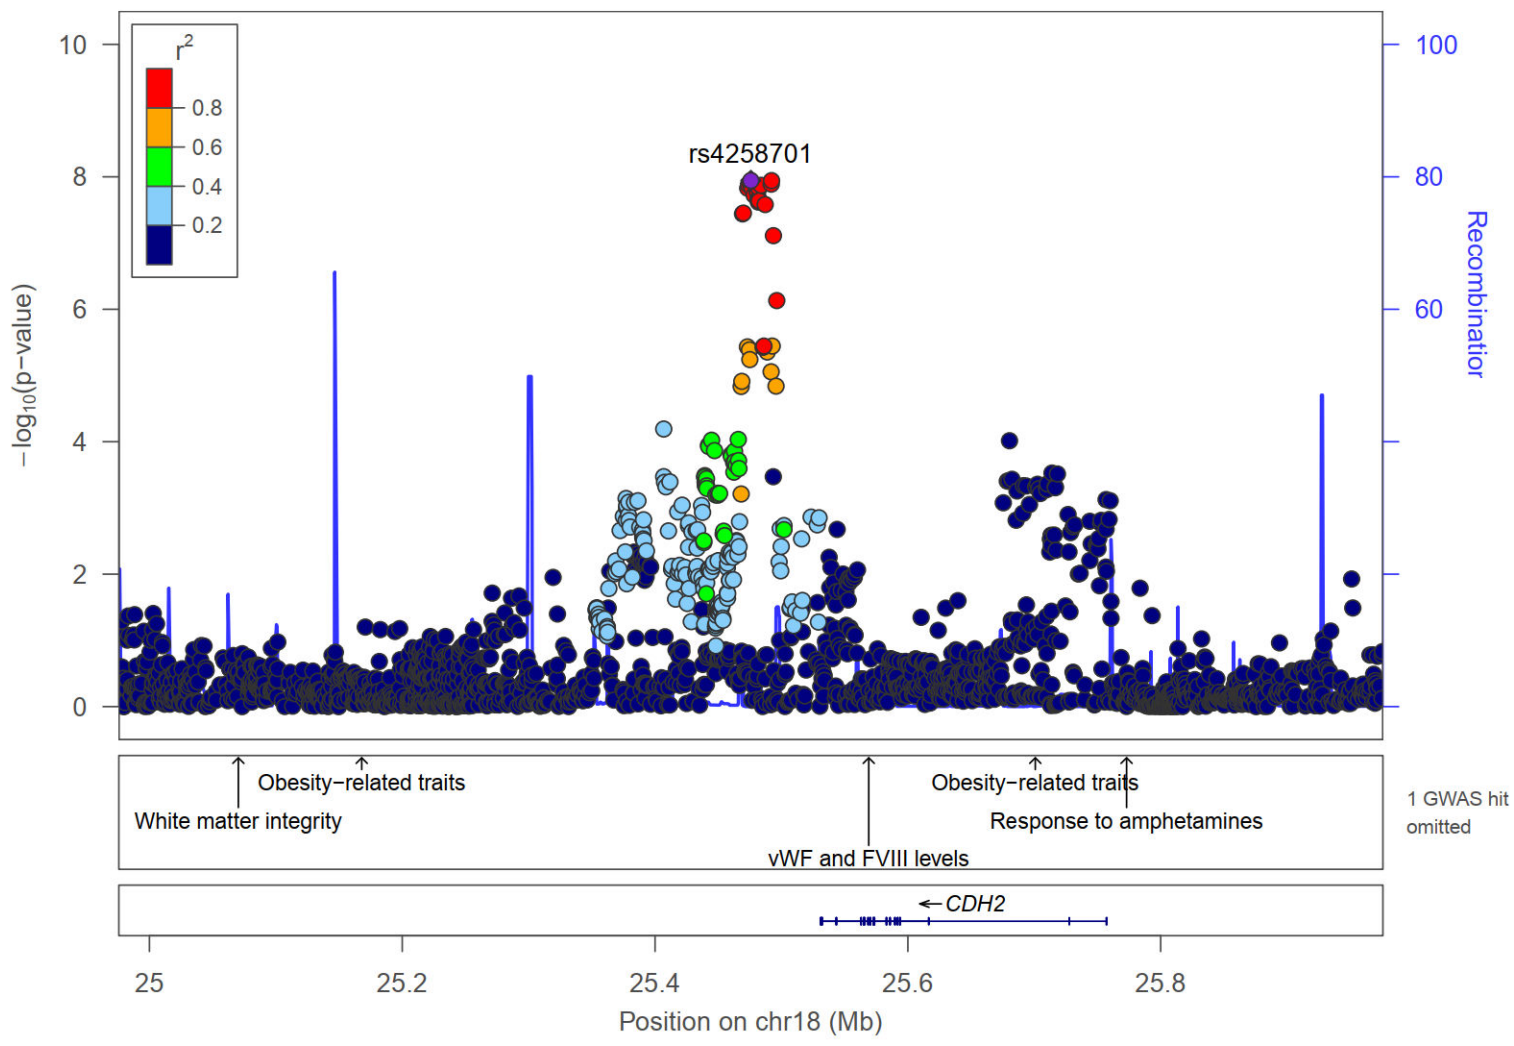

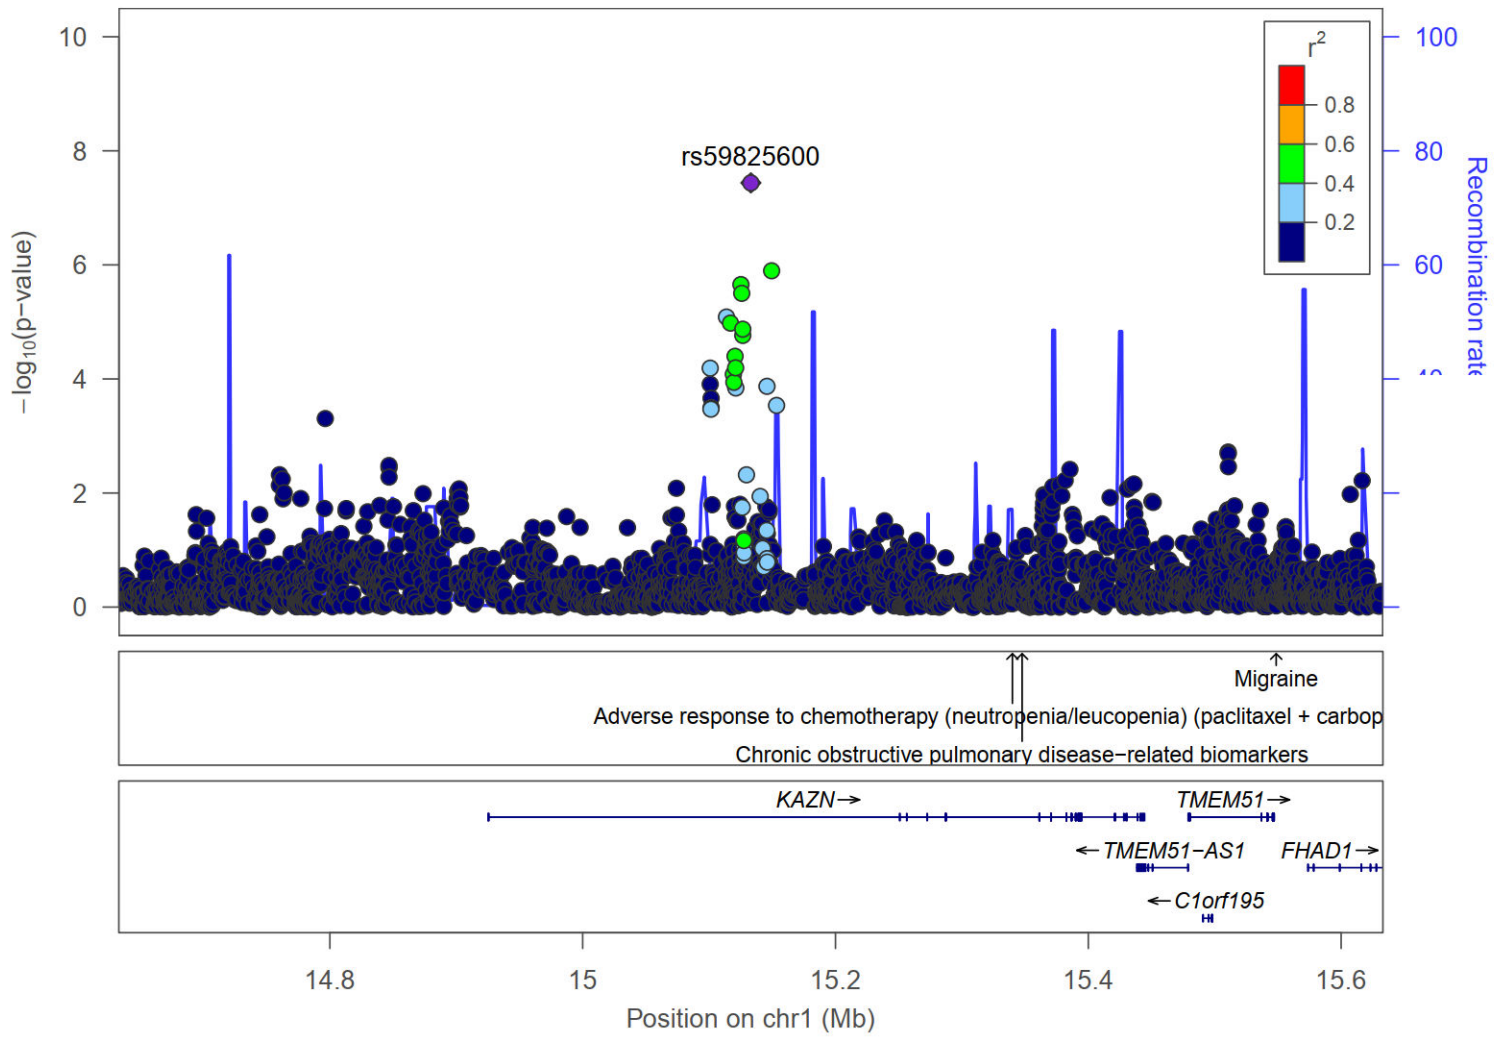



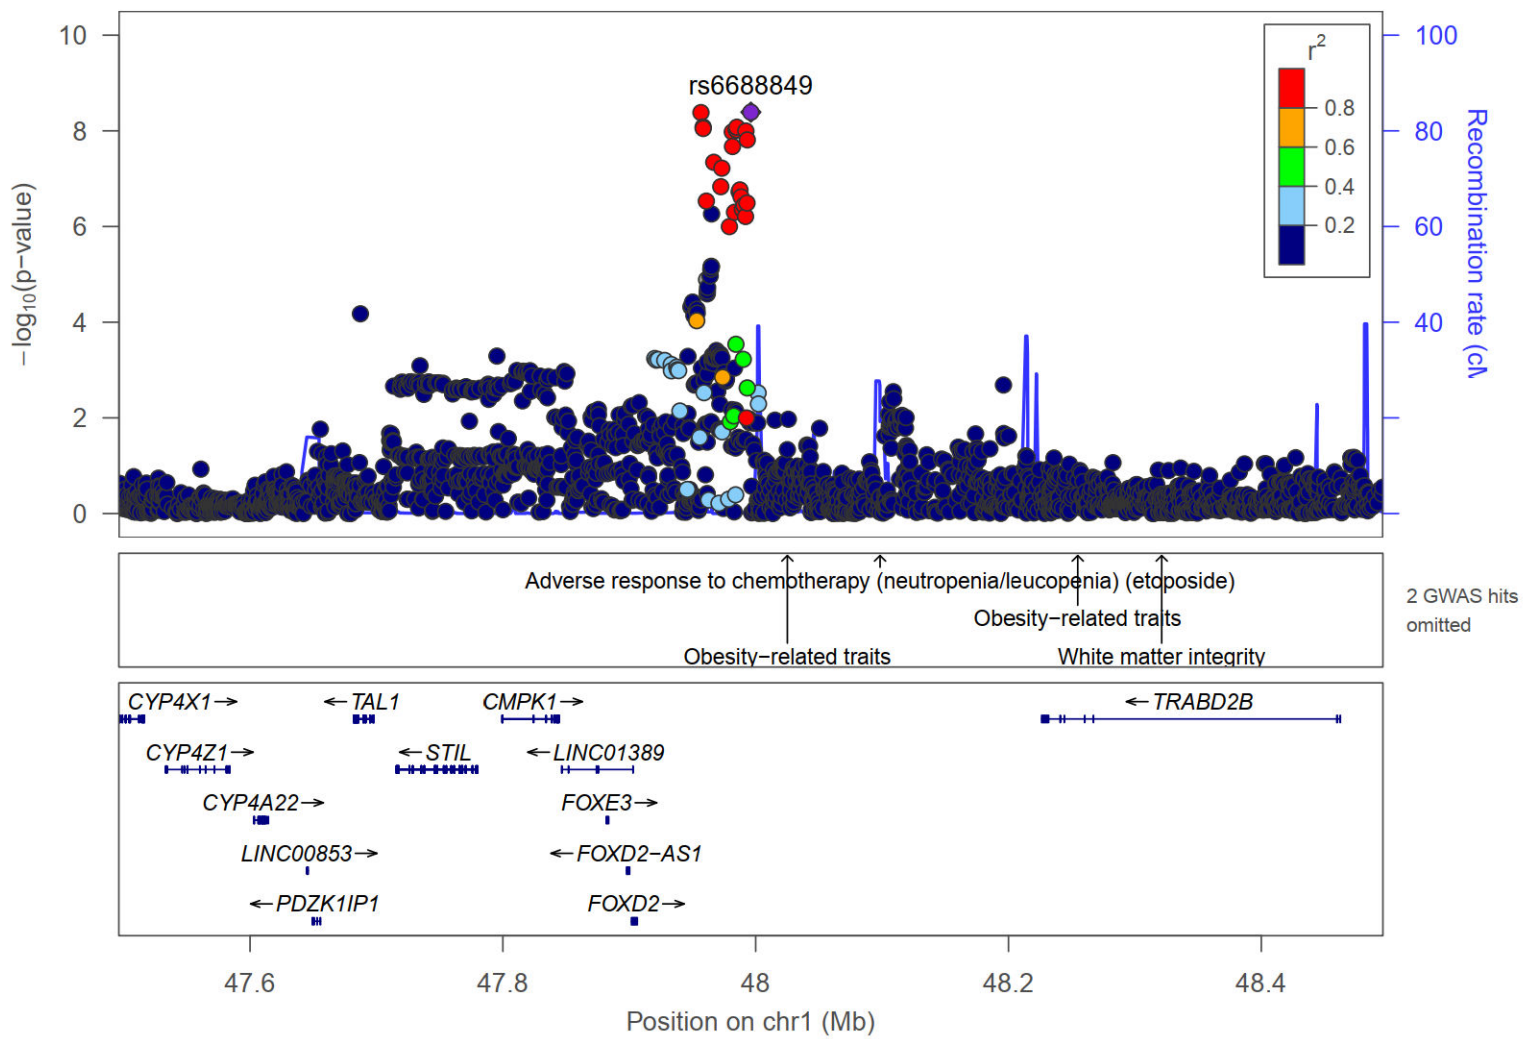

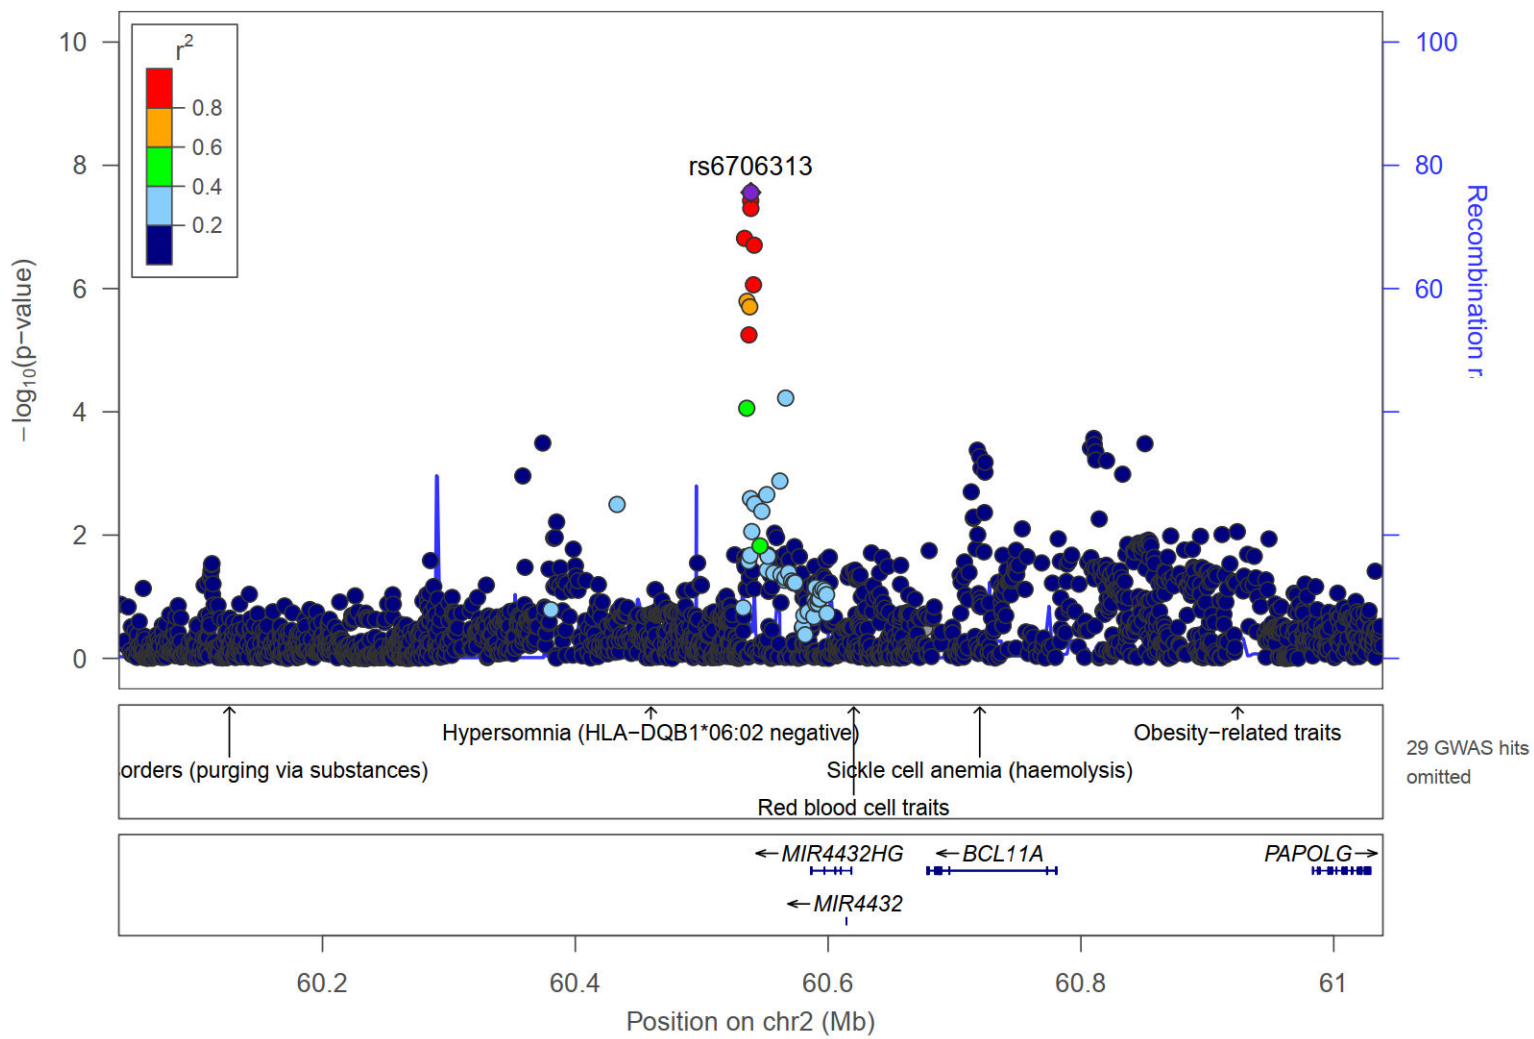

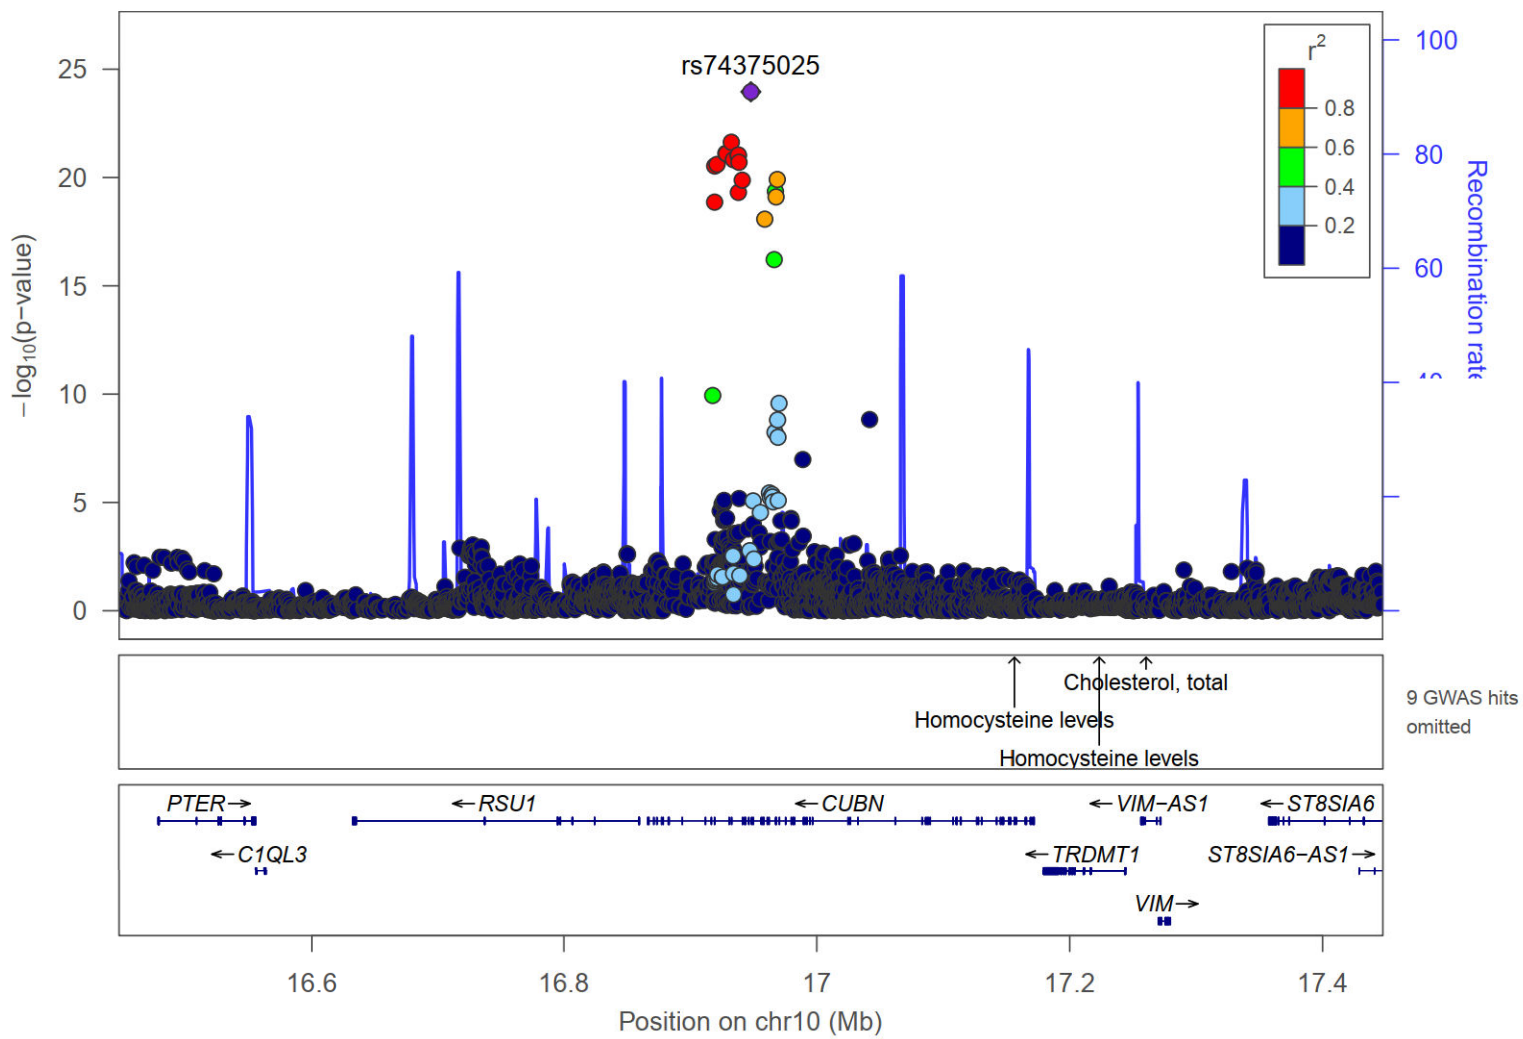

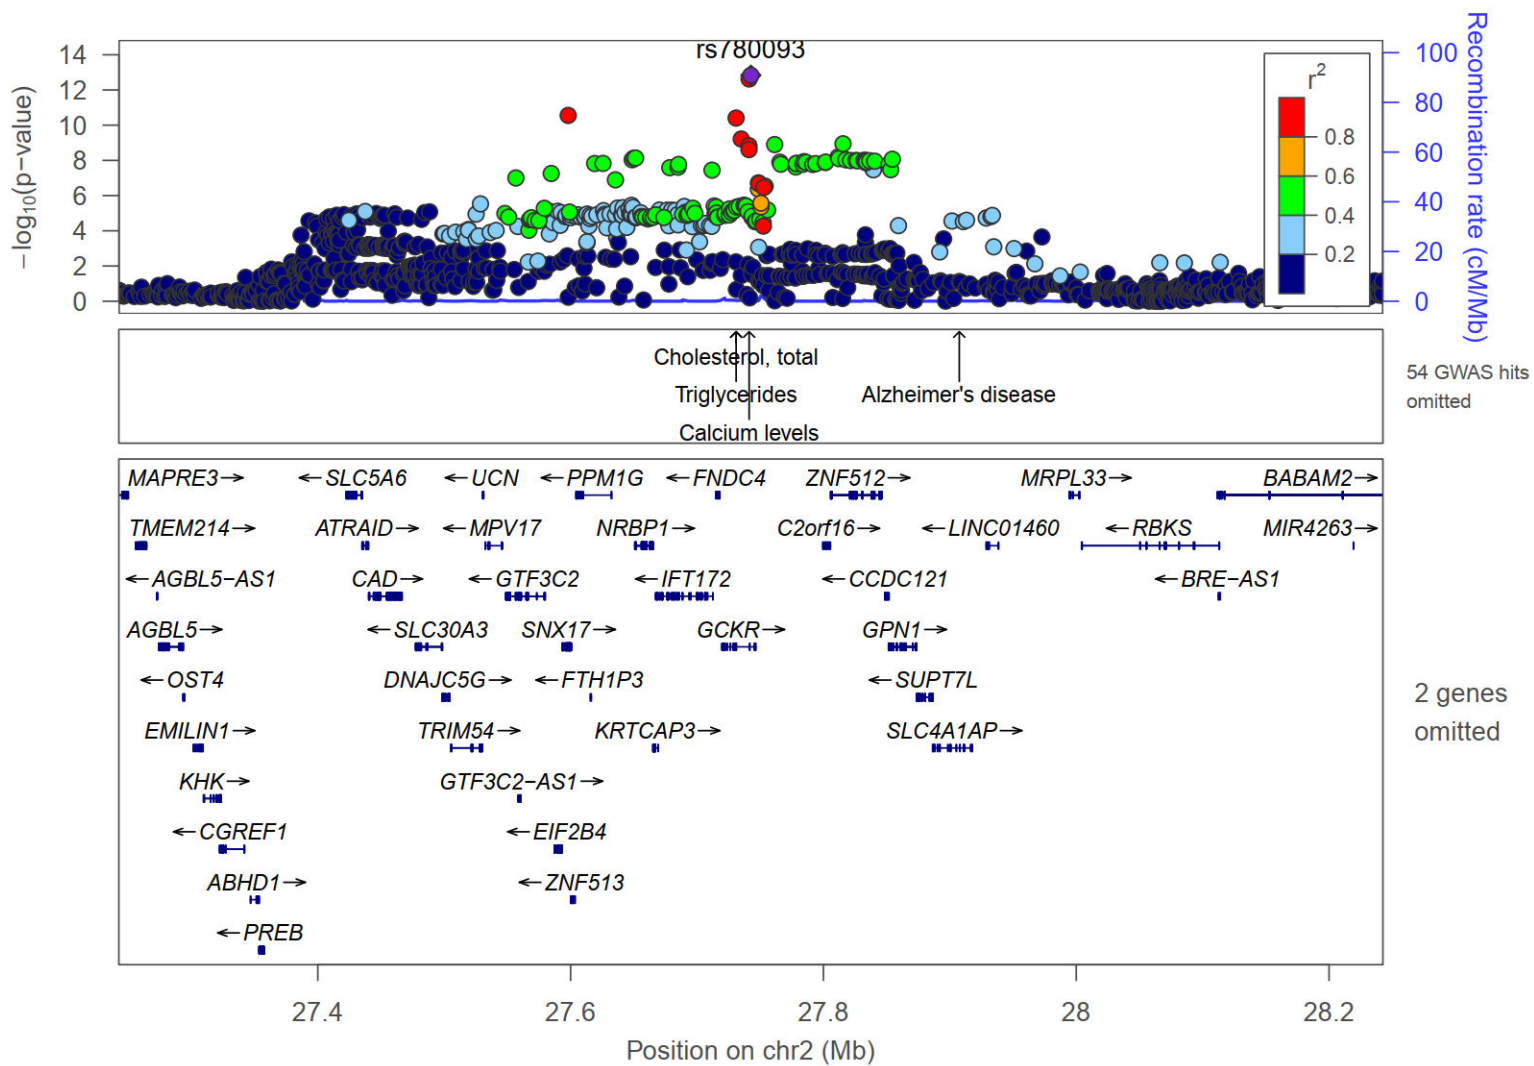

Regional association plots are shown for all genome-wide significant index SNPs. The dots are plotted on the y-axis according to their meta-analysis association p-value, and colored according to their correlation  $r^2$  with the index SNP estimated based on the 1000 Genomes EUR reference samples (gray for missing data). Plots were generated using the stand-alone version 1.3 of LocusZoom<sup>2</sup>. Genetic positions refer to GRCh37/hg19 coordinates.

# Supplementary Figure 5: Manhattan plots for all secondary GWAS meta-analyses

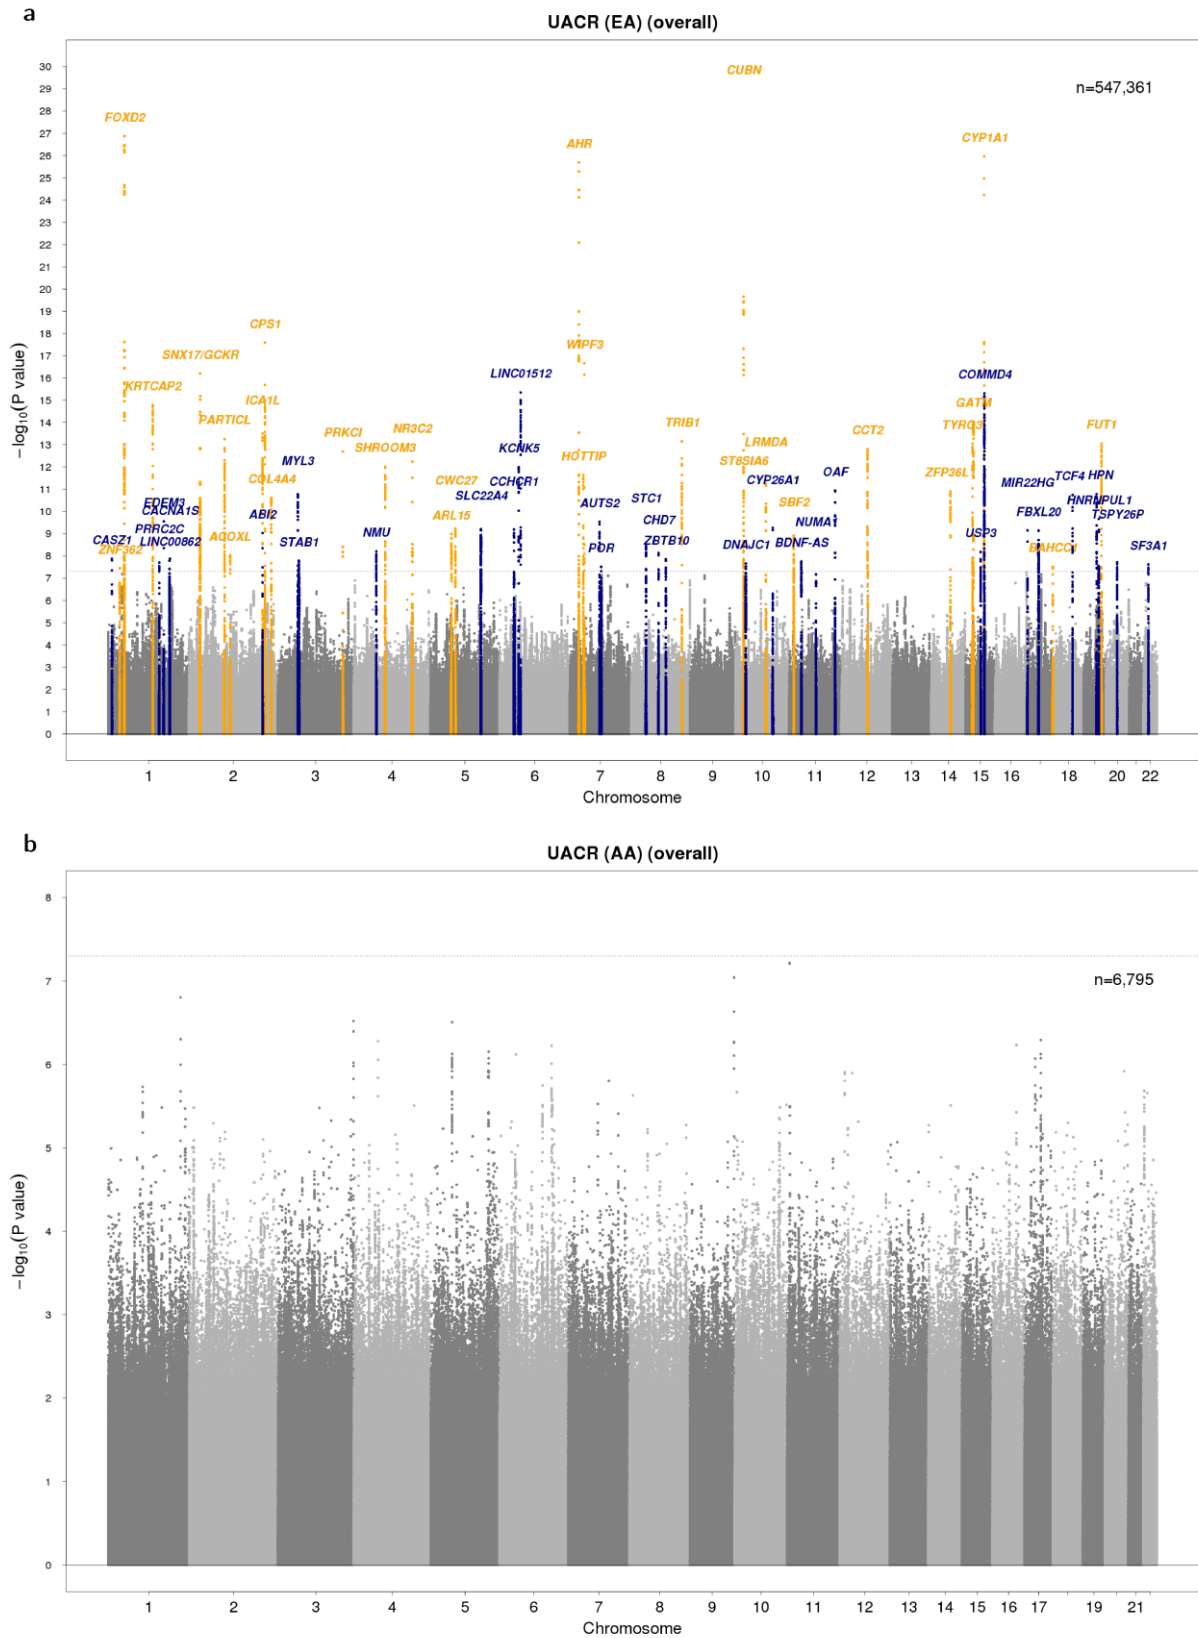

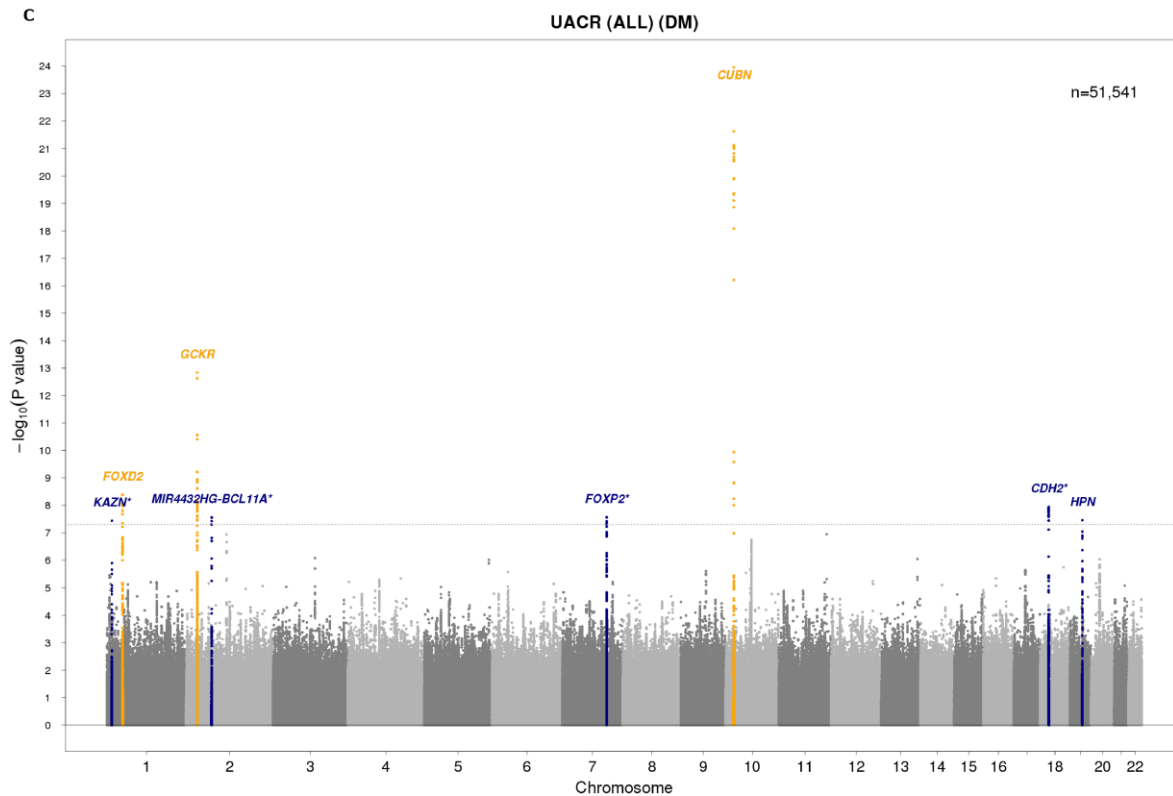

Manhattan plots of the GWAS meta-analysis results for UACR in individuals of European ancestry (a), in individuals of African ancestry (b), and among trans-ethnic individuals with diabetes (c). SNPs are plotted on the x-axis according to their position on each chromosome with the  $-\log_{10}(\text{p-value})$  of the meta-analysis association test on the y-axis. The solid horizontal line indicates the threshold for genome-wide significance,  $5 \times 10^{-8}$ . The labels show the closest gene. New loci are colored in blue, previously published UACR loci in orange. Genomic loci in panel (c) that are specific for individuals with diabetes are marked with an asterisk.



## Supplementary Figure 6: QQ plots for all GWAS meta-analyses

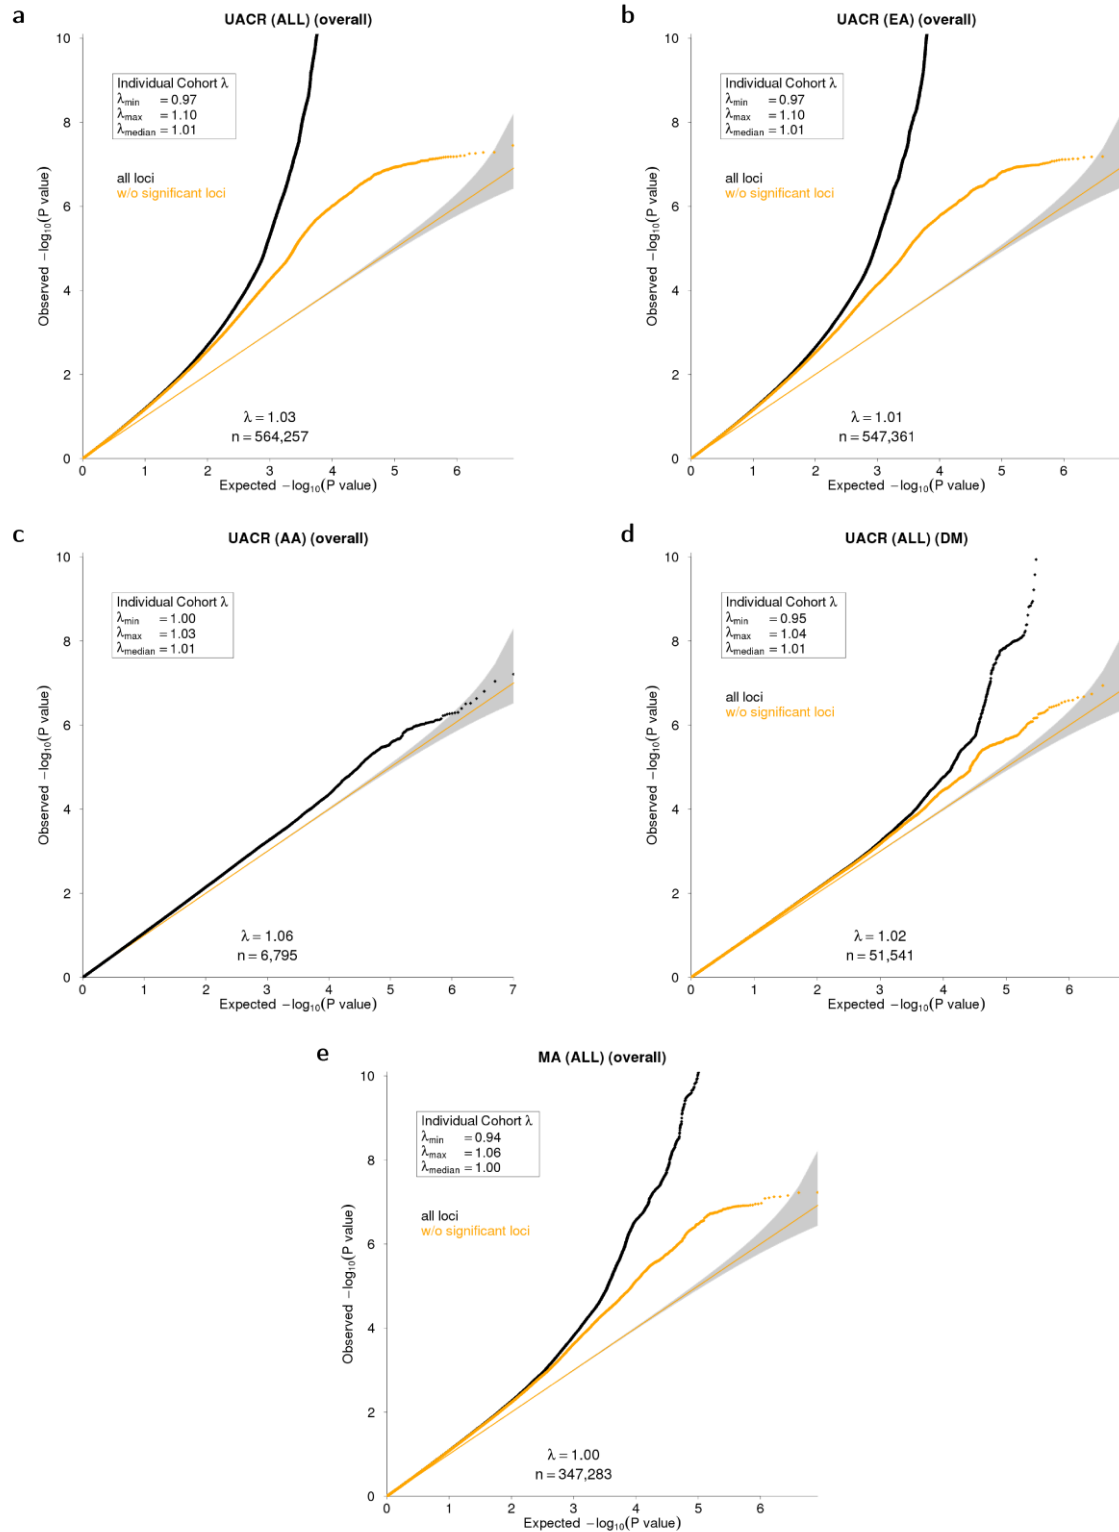

Quantile-quantile (QQ) plots of the GWAS meta-analysis results for UACR in the trans-ethnic sample (a), in individuals of European ancestry (b), in individuals of African ancestry (c), among trans-ethnic individuals with diabetes (d), and for trans-ethnic microalbuminuria meta-analysis (e). The observed p-values of the meta-analysis association test are plotted on the y-axis against their expected distribution under the null hypothesis of no association on the x-axis. Results for all SNPs are shown in black, and results after removal of loci ( $\pm 500\text{kb}$  of index SNP) genome-wide significantly ( $p < 5 \times 10^{-8}$ ) associated with the trait are shown in yellow (the African ancestry GWAS revealed no genome-wide significant associations). Gray bands represent 95% confidence intervals.  $\lambda$ : lambda, genomic control parameter; n: sample size.

**Supplementary Figure 7: Enrichment analysis results for physiological system where UACR-associated genes are highly expressed**

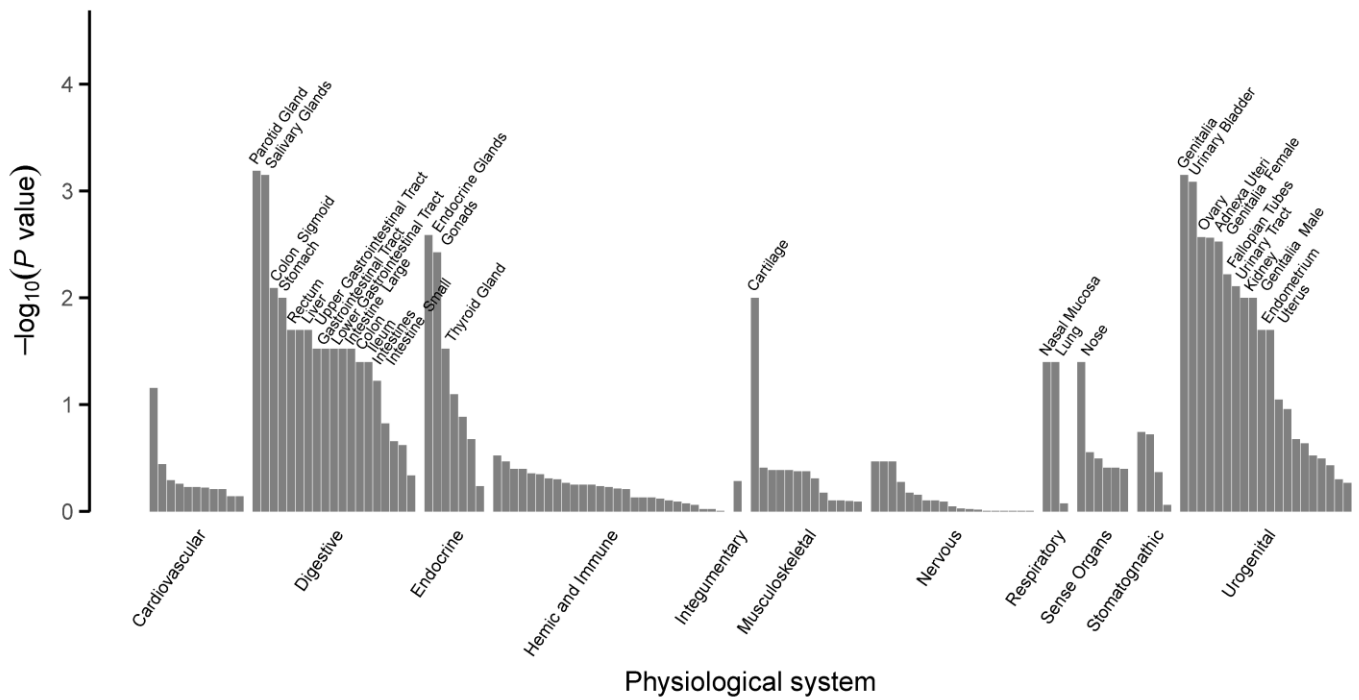

Results for enrichment of physiological systems based on the trans-ethnic UACR GWAS meta-analysis obtained by DEPICT software are shown. The x-axis is labeled by MeSH first level terms. Nominally significant associations ( $p < 0.05$ ) are labeled in the figure. The y-axis represents the  $-\log_{10}(p\text{-value})$  of the enrichment test implemented in DEPICT.

### Supplementary Figure 8: Co-localization of UACR-association signals with gene expression in *cis* across 47 human tissues

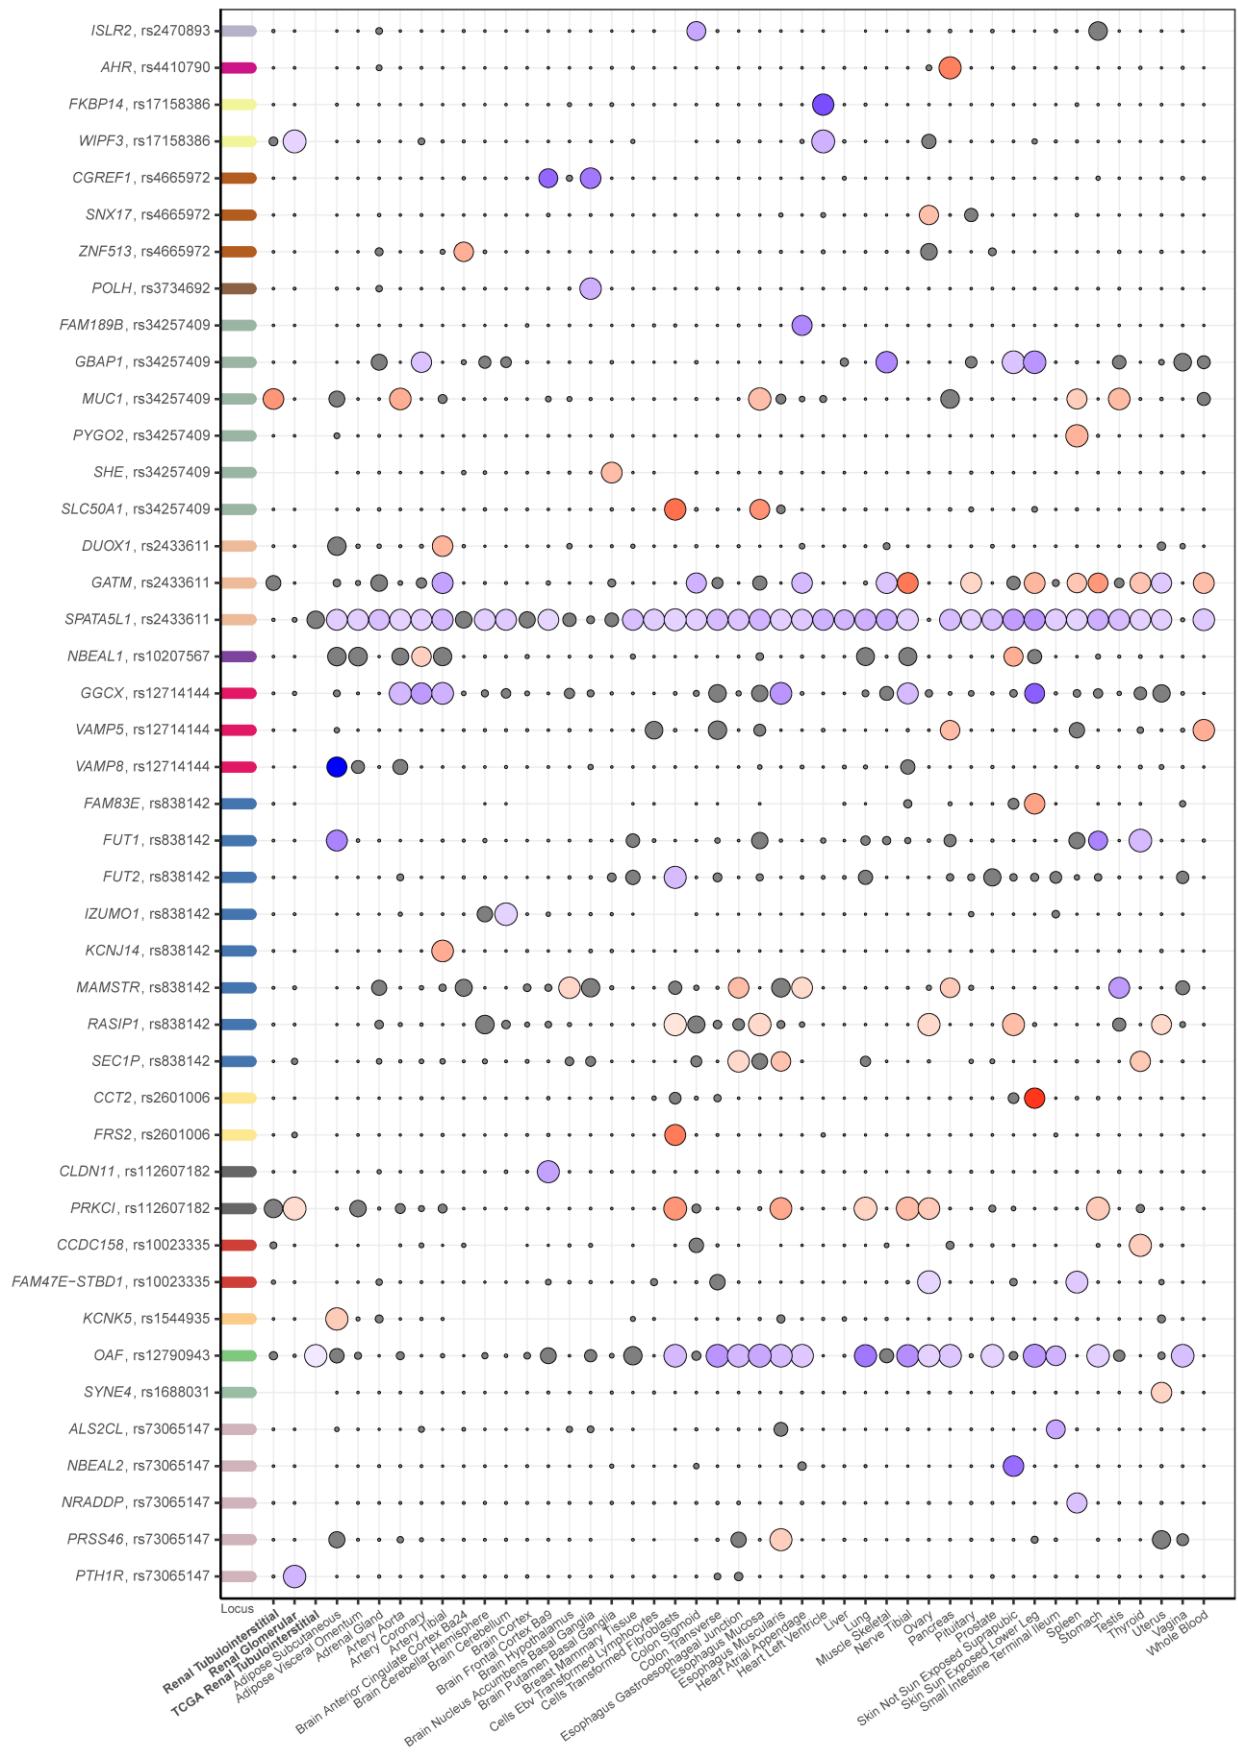

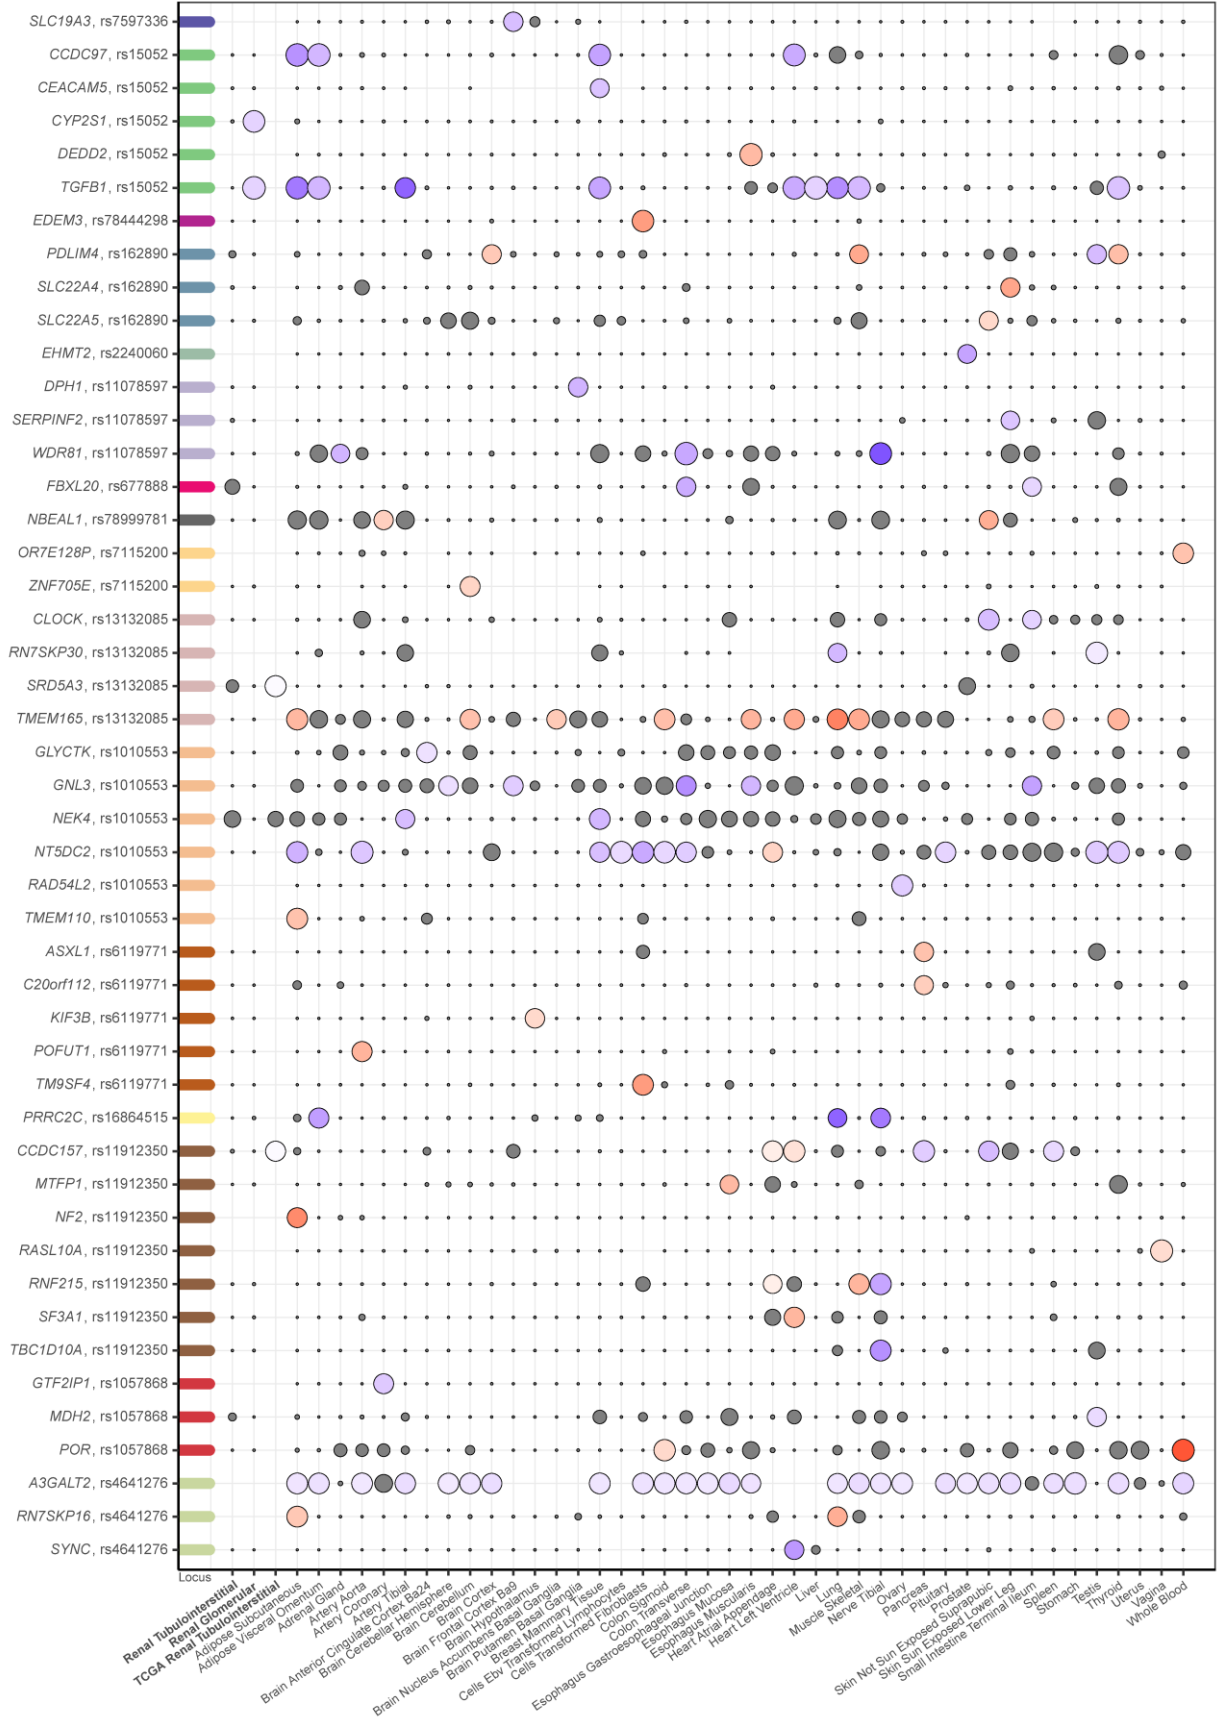

**Posterior probability  
of colocalization**

- [0.0, 0.2)
- [0.2, 0.4)
- [0.4, 0.6)
- [0.6, 0.8)
- [0.8, 1.0]

**Change in gene expression  
with increased UACR**

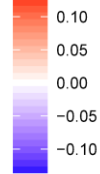

The plot shows genes whose expression levels in any tested tissues co-localized with the UACR association signal with a posterior probability of  $\geq 80\%$ . Genes and their respective index SNP are shown on the y-axis. Co-localization across tissues (x-axis) is illustrated as dots, where the size of the dots indicates the posterior probability of the co-localization. The change in UACR is color-coded relative to the change in gene expression, or gray in case of a posterior probability  $< 0.80$ . Kidney tissues are labeled in bold.

Supplementary Figure 9: The *Drosophila* OAF and *PRKCI* are both required for nephrocyte function and *PRKCI*-RNAi affects slit diaphragm formation

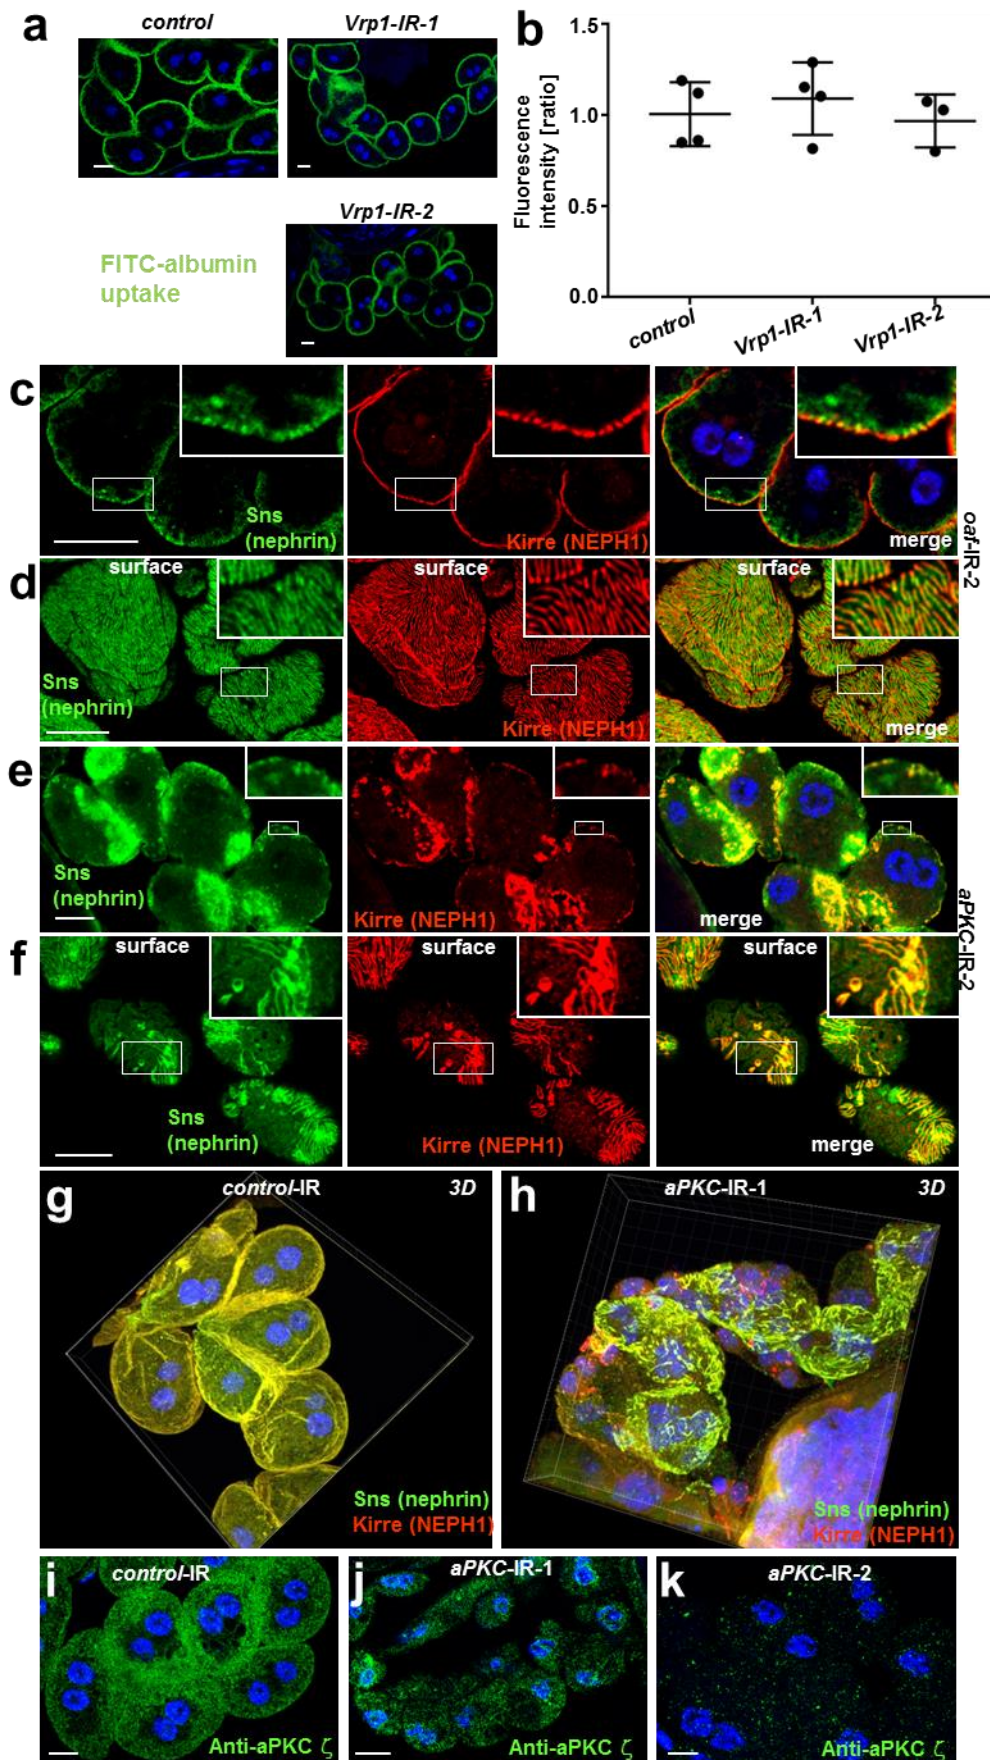



(a) Garland cell nephrocytes were exposed to FITC-albumin. Nephrocytes expressing control-RNAi exhibit intense endocytosis of FITC-albumin. Expression of *Vrp1*-RNAi has no significant effect on FITC-albumin uptake. (b) Quantitation of fluorescence intensity from FITC-albumin uptake is shown for the indicated genotypes. Values are presented as mean±standard deviation of the ratio to a control experiment. Statistical significance was calculated using ANOVA and Dunnett's *post hoc* analysis. A statistically significant difference (defined as  $p < 0.05$ ) was not observed (N=4 for *Vrp1*-RNAi-1, N=3 for *Vrp1*-RNAi-2).

(c) Staining the slit diaphragm proteins Sns (ortholog of nephrin) and Kirre (ortholog of NEPH1) in nephrocytes expressing *oaf*-RNAi-2 shows regular formation of slit diaphragms on the entire nephrocyte surface. (d) Tangential sections through the surface of control nephrocytes reveals the regular fingerprint-like pattern of slit diaphragm proteins.

(e-f) Expression of *aPKC*-RNAi-2 results in a clustered and irregular pattern of slit diaphragm proteins (inset in e) and a complete loss of slit diaphragm protein from distinct areas on the cell surface (insets f).

3D reconstructions from sequential confocal sections of nephrocytes expressing (g) control-RNAi and (h) *aPKC*-RNAi are shown. The surface is completely covered but slit diaphragm protein in the control but upon silencing aPKC large gaps appear.

(i-k) Staining control garland cell nephrocytes using anti-aPKC  $\zeta$ , an antibody that is known to detect *Drosophila* aPKC, reveals a punctate staining pattern that is concentrated at the periphery of the cell including the membrane (i). Expression of *aPKC*-RNAi-1 (j) and *aPKC*-RNAi-2 (k) results in a distinct reduction of the antibody signal from the cell surface and periphery. This indicates a successful knockdown of aPKC on the protein level. Images were recorded at identical settings of the confocal microscope.

All scale bars represent 10  $\mu\text{m}$ .

**Supplementary Table 1: Association results of the UACR genetic risk score quartiles with microalbuminuria in the UKBB**

| Quartile | Effect | SE    | Odds ratio (95% CI) | P-value   | N cases | N controls |
|----------|--------|-------|---------------------|-----------|---------|------------|
| I        |        |       | reference           |           | 6,281   | 54,096     |
| II       | 0.159  | 0.019 | 1.17 (1.13-1.22)    | 2.24E-17  | 7,001   | 51,618     |
| III      | 0.282  | 0.018 | 1.33 (1.28-1.38)    | 7.45E-53  | 7,583   | 49,799     |
| IV       | 0.527  | 0.018 | 1.69 (1.64-1.75)    | 3.04E-191 | 9,149   | 47,224     |

**Supplementary Table 2: Association results of the genetic risk score (GRS) analyses of UACR and it's risk factors**

| Exposure | Outcome | N SNPs | Effect | SE    | OR (95% CI)      | P-value         | N cases | N total | Interpretation of effect                                      |
|----------|---------|--------|--------|-------|------------------|-----------------|---------|---------|---------------------------------------------------------------|
| UACR     | CAD     | 57     | 0.003  | 0.085 | 1.00 (0.85-1.18) | 0.975           | 60,801  | 184,305 | change in log(OR) of CAD per SD unit increase of log(UACR)    |
| UACR     | HF      | 59     | 0.398  | 0.158 | 1.49 (1.09-2.03) | 0.012           | 6,065   | 408,313 | change in log(OR) of HF per SD unit increase of log(UACR)     |
| UACR     | HTN     | 59     | 0.386  | 0.041 | 1.47 (1.36-1.59) | <b>2.38E-21</b> | 226,011 | 408,539 | change in log(OR) of HTN per SD unit increase of log(UACR)    |
| UACR     | Stroke  | 57     | 0.145  | 0.074 | 1.16 (1.00-1.34) | 0.049           | 67,162  | 521,612 | change in log(OR) of Stroke per SD unit increase of log(UACR) |
| DBP      | UACR    | 319    | 0.007  | 0.001 | -                | <b>1.23E-24</b> | -       | 757,601 | change of SD unit of log(UACR) per mm Hg DBP increase         |
| SBP      | UACR    | 244    | 0.008  | 0.001 | -                | <b>3.52E-63</b> | -       | 757,601 | change of SD unit of log(UACR) per mm Hg SBP increase         |
| T2DM     | UACR    | 138    | 0.018  | 0.003 | -                | <b>1.01E-10</b> | 62,892  | 659,316 | change of SD unit of log(UACR) per unit increase in T2DM GRS  |

N SNPs gives the number of SNPs included in the genetic risk score. Significant P-values are marked bold.

N cases: number of cases; N total: total sample size of the non-UACR trait; OR [95% CI]: Odds ratio with 95% confidence interval; SD: standard deviation

CAD: coronary artery disease<sup>3</sup>

HF: heart failure (assessed in the UK BioBank)

HTN: hypertention (assessed in the UK BioBank)

Stroke: any stroke<sup>4</sup>

DBP, SBP: diastolic and systolic blood pressure<sup>5</sup>

T2DM: type 2 diabetes<sup>6</sup>

**Supplementary Table 3: Evidence for additional candidate causal genes at UACR-associated variants**

| Gene         | SNP        | credible set size | variant PP | functional consequence        | CADD | DHS | Brief summary of literature and gene function                                                                                                                                                                                                                                                                                                                                                                                                               |
|--------------|------------|-------------------|------------|-------------------------------|------|-----|-------------------------------------------------------------------------------------------------------------------------------------------------------------------------------------------------------------------------------------------------------------------------------------------------------------------------------------------------------------------------------------------------------------------------------------------------------------|
| <i>EDEM3</i> | rs78444298 | 2                 | 0.92       | p.Pro746Ser (NP_079467.3)     | 24.6 | -   | The protein encoded by the ER Degradation Enhancing Alpha-Mannosidase Like Protein 3 ( <i>EDEM3</i> ) gene belongs to a group of proteins that accelerate degradation of misfolded glycoproteins in the ER. It catalyzes mannose trimming of N-glycans. This variant has been reported in an exome chip study of eGFR (PMID: 27920155).                                                                                                                     |
| <i>CUBN</i>  | rs45551835 | 1                 | 1.00       | p.Ala2914Val (NP_001072.2)    | 34.0 | -   | The cubilin gene ( <i>CUBN</i> ) has been reported in the first GWAS of UACR (PMID: 21355061) and has been replicated many times since. The encoded cubilin protein is important for reabsorption of filtered albumin in the proximal tubule. <i>CUBN</i> KO mice lose albumin in the urine (PMID: 21926402). Rare mutations cause aut-rec megaloblastic anemia-1, Finnish type (#261100). Patients show low-molecular weight proteinuria (PMID: 11717447). |
| <i>CPS1</i>  | rs1047891  | 15                | 0.96       | p.Thr1412Asn (NP_001116105.1) | 22.1 | -   | Carbamoyl-Phosphate Synthase 1 ( <i>CPS1</i> ) encodes a key enzyme of the urea cycle that is important to remove excess urea. Rare mutations cause aut-rec carbamoylphosphate synthetase I deficiency (#237300). GWAS locus for eGFR (PMID: 20383146) and many other quantitative biomarkers. This variant has been reported to associate with hyperammonemia after valproate therapy (PMID: 23997965).                                                    |
| <i>GCKR</i>  | rs1260326  | 5                 | 0.09       | p.Leu446Pro (NP_001477.2)     | 0.1  | 1*  | The Glucokinase Regulator ( <i>GCKR</i> ) gene encodes a regulatory protein inhibiting glucokinase in pancreatic islet cells and liver. Has been identified in previous GWAS of serum albumin (PMID: 23022100), glycated albumin (PMID: 29844224) and multiple other cardiometabolic traits including diabetes.                                                                                                                                             |

This table includes all genes supported by missense variants with high posterior probability (>0.5) of association, or missense variants mapping into small credible sets of size ≤5.

1\*: ENCODE kidney

**Supplementary Table 4: Results of the trans-eQTL analysis**

| SNP meta-analysis | SNP Chr:Position (b37) | SNP p-value meta-analysis | Max. Posterior Probability meta-analysis | LD between SNP and eQTL-SNP ( $r^2$ ) | eQTL-SNP         | eQTL-SNP Chr:Position (b37) | eQTL-Gene       | Chr eQTL Gene | Tissue source of eQTL study | p-value eQTL | inter-chromosomal trans-eQTL |
|-------------------|------------------------|---------------------------|------------------------------------------|---------------------------------------|------------------|-----------------------------|-----------------|---------------|-----------------------------|--------------|------------------------------|
| rs12714144        | 2:85754578             | 5.5E-14                   | 0.194                                    | 0.97                                  | chr2:85753464:D  | 2:85753464                  | <i>DPEP3</i>    | 16            | *1                          | 1.29E-14     | yes                          |
| rs12714144        | 2:85754578             | 5.5E-14                   | 0.194                                    | 0.97                                  | 2:85753464:TTTG_ | 2:85753464                  | <i>DPEP3</i>    | 16            | *2                          | 5.51E-11     | yes                          |
| rs2240060         | 6:31114900             | 6.4E-10                   | 0.183                                    | 1                                     | rs115017941      | 6:31115604                  | <i>BTN3A2</i>   | 6             | *1                          | 3.08E-08     | no                           |
| rs2240060         | 6:31114900             | 6.4E-10                   | 0.183                                    | 1                                     | 6:31108485       | 6:31108485                  | <i>BTN3A2</i>   | 6             | *2                          | 2.70E-11     | no                           |
| rs2240060         | 6:31114900             | 6.4E-10                   | 0.183                                    | 1                                     | rs115017941      | 6:31115604                  | <i>HLA-DRB1</i> | 6             | *1                          | 3.21E-126    | no                           |
| rs2240060         | 6:31114900             | 6.4E-10                   | 0.183                                    | 1                                     | 6:31108485       | 6:31108485                  | <i>HLA-DRB1</i> | 6             | *2                          | 1.82E-63     | no                           |

\*1: PBMC and Whole Blood, LIFE A1&B3 study<sup>7-9</sup>

\*2: Whole Blood, Framingham Heart Study<sup>10</sup>

**Supplementary Table 5: Co-localization results of UACR association signals with those from associations with plasma protein levels**

| UACR SNP   | UACR SNP chr | UACR SNP position | protein name       | protein SNP | protein SNP chr | protein SNP position | protein SNP type | LD ( $r^2$ ) | No. SNPs | PP H4 abf |
|------------|--------------|-------------------|--------------------|-------------|-----------------|----------------------|------------------|--------------|----------|-----------|
| rs12790943 | 11           | 120058623         | OAF.6414.8.3       | rs508205    | 11              | 120057343            | conditional_hit  | 0.90         | 1526     | 0.99      |
| rs1010553  | 3            | 52540773          | AP4M1.10076.1.3    | rs12493107  | 3               | 52706724             | top_sentinel     | 0.50         | 1163     | 0.68      |
| rs162890   | 5            | 131623658         | C1QTNF5.7810.20.3  | rs11955347  | 5               | 131567924            | top_sentinel     | 0.41         | 1398     | 0.62      |
| rs838142   | 19           | 49252151          | CCL25.14068.29.3   | rs35106244  | 19              | 49203829             | top_sentinel     | 0.22         | 1492     | 0.55      |
| rs838142   | 19           | 49252151          | ALPI.10463.23.3    | rs679574    | 19              | 49206108             | top_sentinel     | 0.23         | 1492     | 0.53      |
| rs12790943 | 11           | 120058623         | OAF.6414.8.3       | rs117554512 | 11              | 120098329            | top_sentinel     | 0.00         | 1527     | 0.42      |
| rs838142   | 19           | 49252151          | FUT3.4548.4.2      | rs679574    | 19              | 49206108             | top_sentinel     | 0.23         | 1492     | 0.35      |
| rs838142   | 19           | 49252151          | FGF19.2762.30.2    | rs601338    | 19              | 49206674             | top_sentinel     | 0.24         | 1492     | 0.31      |
| rs838142   | 19           | 49252151          | GOLM1.8983.7.3     | rs601338    | 19              | 49206674             | top_sentinel     | 0.24         | 1492     | 0.27      |
| rs838142   | 19           | 49252151          | FAM177A1.8039.41.3 | rs679574    | 19              | 49206108             | top_sentinel     | 0.23         | 1492     | 0.26      |
| rs838142   | 19           | 49252151          | CCL15.14109.15.3   | rs681343    | 19              | 49206462             | top_sentinel     | 0.24         | 1492     | 0.25      |
| rs838142   | 19           | 49252151          | FAM3D.13102.1.3    | rs601338    | 19              | 49206674             | top_sentinel     | 0.24         | 1492     | 0.22      |
| rs6119771  | 20           | 30770375          | POFUT1.5634.39.3   | rs35968884  | 20              | 30818823             | conditional_hit  | 0.00         | 814      | 0.06      |
| rs2240060  | 6            | 31114900          | CREB3L4.11308.8.3  | rs41558819  | 6               | 31324166             | conditional_hit  | 0.00         | 6890     | 0.016     |
| rs2240060  | 6            | 31114900          | LRPAP1.3640.14.3   | rs28572463  | 6               | 31209854             | conditional_hit  | 0.01         | 6890     | 0.002     |
| rs56043834 | 19           | 41331149          | MIA.2687.2.1       | rs2604877   | 19              | 41275048             | top_sentinel     | 0.01         | 1672     | 0.0005    |
| rs1010553  | 3            | 52540773          | SEMA3G.5628.21.3   | rs13091025  | 3               | 52467324             | conditional_hit  | 0.11         | 1162     | 0.0003    |
| rs35572189 | 17           | 79419025          | ENTHD2.7947.19.3   | rs61745945  | 17              | 79205421             | top_sentinel     | 0.00         | 1858     | 0.0003    |
| rs2240060  | 6            | 31114900          | LRPAP1.8829.4.3    | 6:31149622  | 6               | 31149622             | conditional_hit  | 0.01         | 6890     | 0.0002    |
| rs56043834 | 19           | 41331149          | MIA.2687.2.1       | rs34532358  | 19              | 41288723             | conditional_hit  | 0.08         | 1660     | 7.0E-05   |
| rs2240060  | 6            | 31114900          | GNLY.3195.50.2     | rs558163186 | 6               | 31253305             | top_sentinel     | 0.06         | 6891     | 2.1E-05   |
| rs6119771  | 20           | 30770375          | POFUT1.5634.39.3   | rs76143353  | 20              | 30815755             | top_sentinel     | 0.04         | 815      | 2.0E-05   |
| rs15052    | 19           | 41813375          | B3GNT8.9297.12.3   | rs557663478 | 19              | 41933790             | top_sentinel     | 0.00         | 1303     | 1.7E-05   |
| rs12714144 | 2            | 85754578          | GNLY.3195.50.2     | rs10169536  | 2               | 85912860             | conditional_hit  | 0.02         | 1503     | 1.6E-05   |
| rs15052    | 19           | 41813375          | B3GNT2.7980.72.3   | rs67047091  | 19              | 41938684             | top_sentinel     | 0.00         | 1303     | 1.5E-05   |
| rs2240060  | 6            | 31114900          | GZMA.3440.7.2      | rs10569394  | 6               | 31240246             | top_sentinel     | 0.06         | 6891     | 1.4E-05   |
| rs7115200  | 11           | 71752160          | STAB1.14599.18.3   | rs139130389 | 11              | 71850156             | top_sentinel     | 0.00         | 1417     | 1.4E-05   |
| rs1010553  | 3            | 52540773          | SEMA3G.5628.21.3   | rs2016575   | 3               | 52477080             | top_sentinel     | 0.06         | 1163     | 1.3E-05   |
| rs7115200  | 11           | 71752160          | CST8.10572.65.3    | rs139130389 | 11              | 71850156             | top_sentinel     | 0.00         | 1417     | 1.2E-05   |
| rs2240060  | 6            | 31114900          | LRPAP1.3640.14.3   | rs41552714  | 6               | 31324756             | top_sentinel     | 0.01         | 6891     | 2.1E-06   |
| rs2240060  | 6            | 31114900          | LRPAP1.8829.4.3    | rs41552714  | 6               | 31324756             | top_sentinel     | 0.01         | 6891     | 2.1E-06   |
| rs2240060  | 6            | 31114900          | CREB3L4.11308.8.3  | rs9295987   | 6               | 31349844             | top_sentinel     | 0.02         | 6891     | 1.6E-06   |
| rs2240060  | 6            | 31114900          | LILRB1.5090.49.2   | rs141232332 | 6               | 31075601             | top_sentinel     | 0.14         | 6891     | 1.5E-06   |
| rs12790943 | 11           | 120058623         | IL25.4137.57.2     | rs2508490   | 11              | 120099679            | top_sentinel     | 0.01         | 1527     | 4.1E-08   |
| rs12714144 | 2            | 85754578          | GNLY.3195.50.2     | rs17430897  | 2               | 85912962             | conditional_hit  | 0.01         | 1504     | 2.6E-10   |
| rs12714144 | 2            | 85754578          | GNLY.3195.50.2     | rs12151621  | 2               | 85934499             | top_sentinel     | 0.00         | 1505     | 1.3E-10   |
| rs3734692  | 6            | 43817791          | VEGFA.14032.2.3    | rs6921438   | 6               | 43925607             | top_sentinel     | 0.00         | 1507     | 1.2E-12   |
| rs3734692  | 6            | 43817791          | VEGFA.2597.8.3     | rs6921438   | 6               | 43925607             | top_sentinel     | 0.00         | 1507     | 1.2E-12   |

PP: posterior probability; LD: linkage disequilibrium; PP H4 abf: posterior probability of the H4 test (one common causal variant of trait and pQTL association)

## References

1. GTEx Consortium *et al.* Genetic effects on gene expression across human tissues. *Nature* **550**, 204–213 (2017).
2. Pruim, R. J. *et al.* LocusZoom: regional visualization of genome-wide association scan results. *Bioinformatics* **26**, 2336–7 (2010).
3. Nikpay, M. *et al.* A comprehensive 1,000 Genomes-based genome-wide association meta-analysis of coronary artery disease. *Nat. Genet.* **47**, 1121–1130 (2015).
4. Malik, R. *et al.* Multiancestry genome-wide association study of 520,000 subjects identifies 32 loci associated with stroke and stroke subtypes. *Nat. Genet.* **50**, 524–537 (2018).
5. Evangelou, E. *et al.* Genetic analysis of over 1 million people identifies 535 new loci associated with blood pressure traits. *Nat. Genet.* **50**, 1412–1425 (2018).
6. Xue, A. *et al.* Genome-wide association analyses identify 143 risk variants and putative regulatory mechanisms for type 2 diabetes. *Nat. Commun.* **9**, 2941 (2018).
7. Kirsten, H. *et al.* Dissecting the genetics of the human transcriptome identifies novel trait-related trans-eQTLs and corroborates the regulatory relevance of non-protein coding loci†. *Hum. Mol. Genet.* **24**, 4746–63 (2015).
8. Beutner, F. *et al.* Rationale and design of the Leipzig (LIFE) Heart Study: phenotyping and cardiovascular characteristics of patients with coronary artery disease. *PLoS One* **6**, e29070 (2011).
9. Loeffler, M. *et al.* The LIFE-Adult-Study: objectives and design of a population-based cohort study with 10,000 deeply phenotyped adults in Germany. *BMC Public Health* **15**, 691 (2015).
10. Joehanes, R. *et al.* Integrated genome-wide analysis of expression quantitative trait loci aids interpretation of genomic association studies. *Genome Biol.* **18**, 16 (2017).
